# Supplementary material for: Native-carboxylate-assisted enantioselective C–H annulations with allenes and 1,3-dienes on ferrocene
Source: Royal Society of Chemistry journal article supplement (doi:10.1039/d5cc06160a), 2025-12-09
Supplement: d5cc06160a2.pdf [file d5cc06160a2.pdf]

*Supporting Information*

**Native Carboxylate-Assisted Enantioselective C–H Annulations with Allenes and 1,3-Dienes on Ferrocene**

Devendra Parganiha, Yagya Dutt Upadhyay, Sumit Khevariya,<sup>#</sup> Pruthviraj Amar Patil,<sup>#</sup> Svastik Jaiswal, Yogesh Dhasmana, and Sangit Kumar<sup>\*</sup>

Department of Chemistry, Indian Institute of Science Education and Research (IISER) Bhopal, Bhopal By-pass Road, Bhauri, Bhopal, Madhya Pradesh, India, 462 066

E-mail: [sangitkumar@iiserb.ac.in](mailto:sangitkumar@iiserb.ac.in)

| S. No | Contents                                                                                                                                             | Page No. |
|-------|------------------------------------------------------------------------------------------------------------------------------------------------------|----------|
| 1     | General experimental details and synthesis of ferrocenyl carboxylic acid derivatives, MPAA ligands, allenes, and dienes                              | 2-4      |
| 2     | Optimization of the reaction condition for the enantioselective C–H annulations of ferrocene carboxylic acid with allene <b>2a</b>                   | 5-7      |
| 3     | Synthesis of ferrocene fused isochromans <b>3a-3v</b> with allenes and dienes.                                                                       | 8-19     |
| 4     | Post-synthetic transformation: Synthesis of 1,2-keto ferrocene acid <b>4</b>                                                                         | 20       |
| 5     | HPLC Traces of planar chiral ferrocene fused isochromans <b>3a-4</b>                                                                                 | 21-36    |
| 6     | Crystallographic details of compound <b>3d</b>                                                                                                       | 37-44    |
| 7     | Computational studies for enantiodetermining transition states                                                                                       | 45-50    |
| 8     | Multinuclear ( <sup>1</sup> H, <sup>13</sup> C,) NMR spectra of planar chiral ferrocene fused isochromans <b>3a-4</b> and post-derivatized compounds | 46-99    |
| 9     | References                                                                                                                                           | 100      |

## General Experimental Details

Starting materials were prepared under an inert atmosphere ( $N_2$ , Ar), and Pd-catalyzed ferrocene fused isochroman derivatives were prepared under dry air. Primary analyses were carried out using thin-layer chromatography (TLC) with silica-coated plates. Reagents were procured from commercial sources, including Sigma Aldrich, Alfa Aesar, BLD Pharma, and Spectrochem. The solvents were meticulously dried following standard procedures. Nuclear Magnetic Resonance (NMR) spectral data were collected using Bruker 400, 500, and 700 MHz spectrometers, with chemical shift values reported in parts per million (ppm) relative to  $CDCl_3$  as an internal standard (7.26 ppm for  $^1H$ , 77.16 ppm for  $^{13}C$ ).  $^{19}F$  NMR data are reported in  $\delta$  units (ppm) and were measured relative to the signals for residual  $CFCl_3$  (0.00 ppm) in the deuterated chloroform solvent unless otherwise stated. Multiplicity was denoted using the following abbreviations: s (singlet), d (doublet), t (triplet), q (quartet), dd (doublet of doublet), td (triplet of doublet), and m (multiplet). High-resolution mass spectrometric (HRMS) analyses were performed using a quadrupole time-of-flight mass spectrometry (Q-TOF-MS) instrument with an electrospray ionization (ESI) technique. Chiral analysis was carried out using high-performance liquid chromatography (HPLC) equipment from Agilent Technologies and PerkinElmer for compounds **3a** and **3h** only employing CHIRALCELL OZ-3, AD-H, and AD-3 chiral HPLC columns. The weighing balance utilized was from Sartorius (model BSA224S-CW). Single crystal X-ray data were collected using a Bruker APEX-II CCD diffractometer equipped with a CMOS Photon 100 detector. Crystal structures were refined using the Olex2 and WinGX Program System package with the SHELXL-2019/2 program. The starting material and amines were freshly prepared by following a reported procedure with slight modifications, while ferrocene carboxylic acid and its derivatives<sup>1</sup> were directly purchased from BLD Pharm India and used without further purification or synthesized according to the literature. Amino acids and *R*-BINOL were directly purchased from commercial sources and further modified using the reported procedure.

## Synthesis of precursors **2a-2m**

Allenes **2a-2k**, and diene (**2l-2m**) were synthesized according to the previously reported literature procedure<sup>2</sup>, and allene **2g** was purchased commercially.

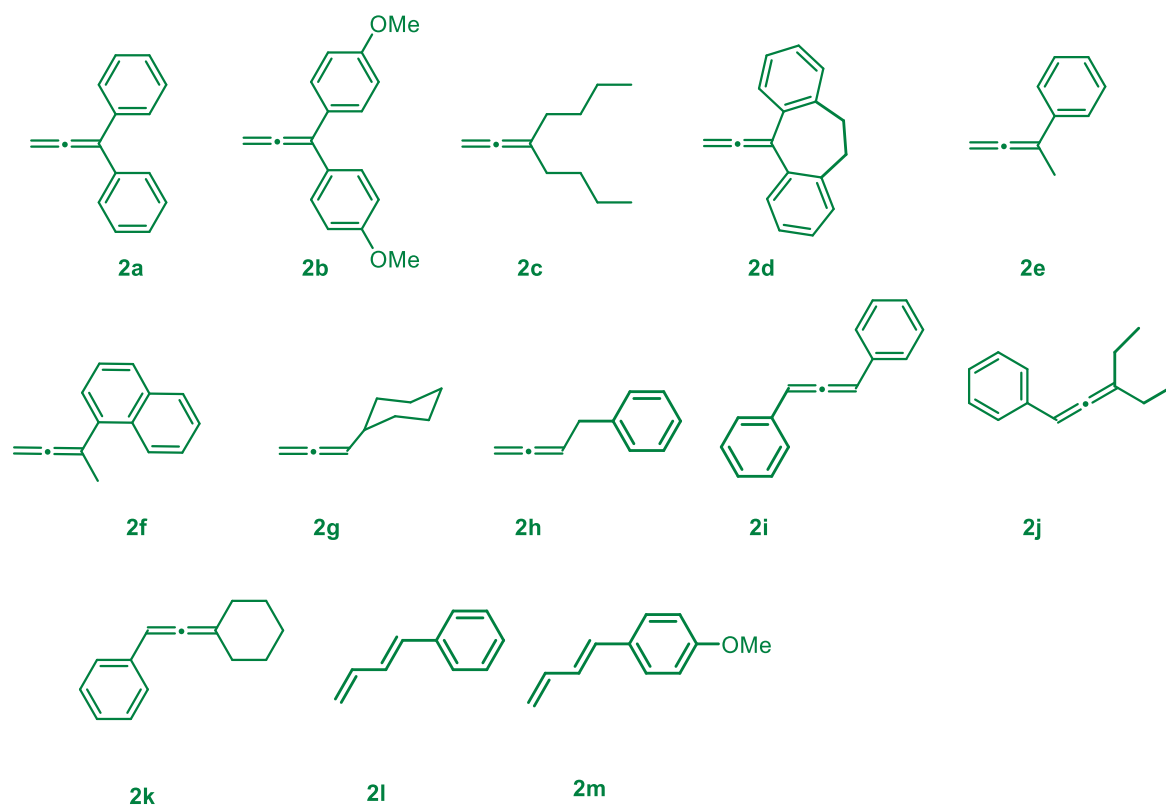

**Figure S1.** Synthesis of allenes and dienes **2a-2m**.

## Synthesis of ligand L1-L12

Monoprotected amino acid-derived ligand **L1-L9**, **L11** was synthesized according to the reported literature<sup>3</sup> procedure and **L10**, **L12** was purchased commercially.

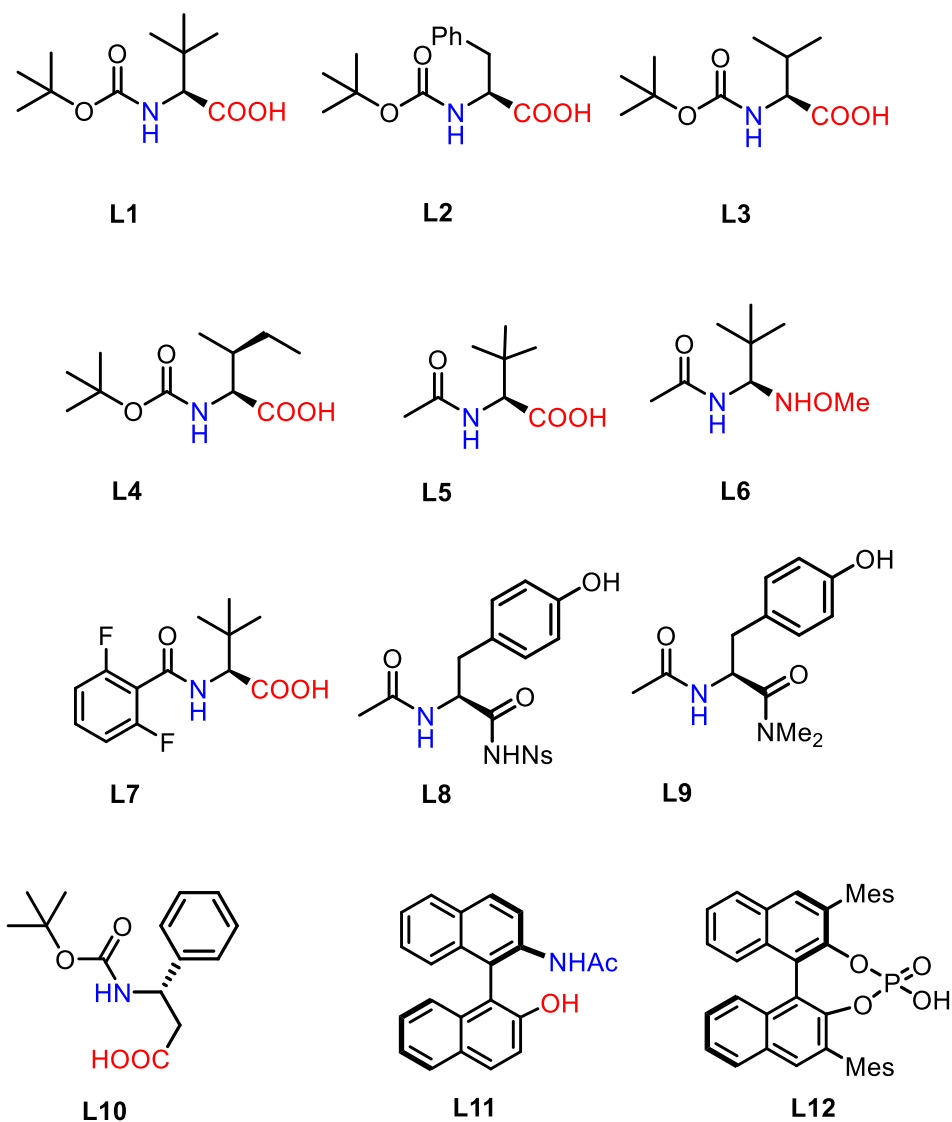

**Figure S2.** List of ligand **L1-L12**

## Reaction Optimization

Reaction optimization for enantioselective synthesis of ferrocene fused isochroman derivatives

**Table S1.** Reaction optimization by varying the solvents, time, and temperature <sup>a</sup>

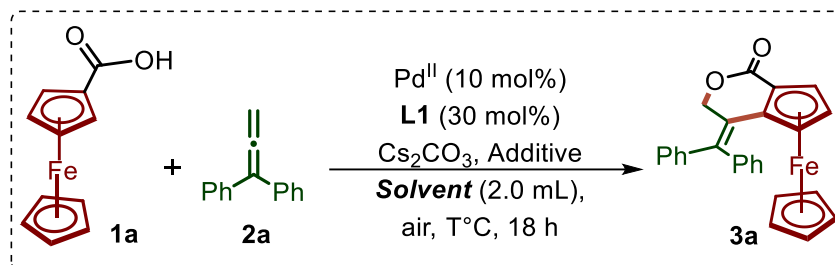

| Entry    | Solvent                         | Additive | Temp. (°C) | Yield (%) <sup>b</sup> | <i>er</i> (%) <sup>c</sup> |
|----------|---------------------------------|----------|------------|------------------------|----------------------------|
| 1        | THF                             | -        | 60         | 40                     | 82:18                      |
| 2        | Toluene                         | -        | 60         | 18                     | 60:40                      |
| 3        | DMF                             | -        | 60         | NR                     | -                          |
| 4        | DMSO                            | -        | 60         | 8                      | 78:22                      |
|          | TFE                             | -        | 60         | NR                     | -                          |
|          | HFIP                            | -        | 60         | NR                     | -                          |
| 5        | <i>tert</i> -amyl alcohol       | -        | 60         | 72                     | 85:15                      |
| <b>6</b> | <b><i>tert</i>-amyl alcohol</b> | -        | <b>35</b>  | <b>65</b>              | <b>90:10</b>               |
| 7        | <i>tert</i> -amyl alcohol       | TBAB     | 35         | 66                     | 88:12                      |

*Reaction conditions:* (a) **1a** (30 mg, 0.13 mmol, 1 equiv), **2a** (2 equiv), Pd(OAc)<sub>2</sub> (10 mol%), **L1** (30 mol%), Additive (0.5 equiv), Cs<sub>2</sub>CO<sub>3</sub> (1.2 equiv), solvent (2 mL), air, T °C, 18h. (b) Crude yield of **3a** is determined by <sup>1</sup>H NMR with CH<sub>2</sub>Br<sub>2</sub> as an internal standard. (c) *er* of **3a** was determined by HPLC analysis.

**Table S2.** Base Optimization <sup>a</sup>

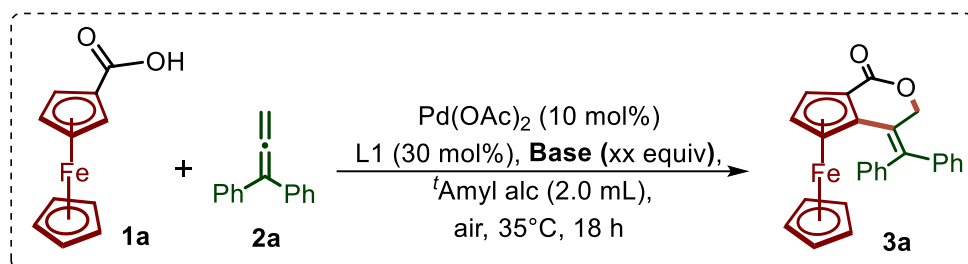

| Entry                 | Base                            | Equiv      | Yield (%) <sup>b</sup> | <i>er</i> (%) <sup>c</sup> |
|-----------------------|---------------------------------|------------|------------------------|----------------------------|
| <b>1</b>              | Cs <sub>2</sub> CO <sub>3</sub> | <b>1.2</b> | <b>65</b>              | <b>90:10</b>               |
| 2                     | K <sub>2</sub> CO <sub>3</sub>  | 1.2        | 55                     | 84:16                      |
| 3                     | Na <sub>2</sub> CO <sub>3</sub> | 1.2        | 57                     | 78:22                      |
| 4                     | Li <sub>2</sub> CO <sub>3</sub> | 1.2        | NR                     | -                          |
| 5                     | CsOAc                           | 1.2        | 66                     | 70:30                      |
| 6                     | KF                              | 1.2        | 62                     | 87:13                      |
| 7                     | CsF                             | 1.2        | 71                     | 91:9                       |
| 8                     | NEt <sub>3</sub>                | 1.2        | NR                     | -                          |
| <b>9</b>              | <b>CsF</b>                      | <b>1.5</b> | <b>72</b>              | <b>92:8</b>                |
| 10                    | CsF                             | 2          | 72                     | 91:9                       |
| 11                    | CsF                             | 2.5        | 72                     | 90:10                      |
| <b>12<sup>d</sup></b> | <b>CsF</b>                      | <b>1.8</b> | <b>80</b>              | <b>93:7</b>                |

*Reaction conditions:* (a) **1a** (30 mg, 0.13 mmol, 1 equiv), **2a** (2 equiv), Pd(OAc)<sub>2</sub> (10 mol%), **L1** (30 mol%), **Base** (xx equiv), *tert* amyl alc (2 mL), air, 35 °C, 18h. (b) Crude yield of **3a** is determined by <sup>1</sup>H NMR with CH<sub>2</sub>Br<sub>2</sub> as an internal standard. (c) *er* of **3a** was determined by HPLC analysis. (d) 0.6 equiv of **L1** was used instead of 0.3 equiv with 1.8 equiv CsF.

**Table S3.** Ligand Screening <sup>a</sup>

|                                                                                                                                                             |                                                                                                                                        |                                                                                                                                         |                                                                                                                                           |
|-------------------------------------------------------------------------------------------------------------------------------------------------------------|----------------------------------------------------------------------------------------------------------------------------------------|-----------------------------------------------------------------------------------------------------------------------------------------|-------------------------------------------------------------------------------------------------------------------------------------------|
| 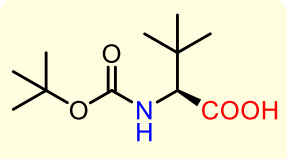 <p><b>L1</b><br/>75% Yield<sup>b</sup><br/>92:8 <i>er</i><sup>c</sup></p> |  <p><b>L2</b><br/>68% Yield<br/>88:12 <i>er</i></p>   |  <p><b>L3</b><br/>65% Yield<br/>86:14 <i>er</i></p>   |  <p><b>L4</b><br/>40% Yield<br/>82:18 <i>er</i></p>    |
|  <p><b>L5</b><br/>59% Yield<br/>87:13 <i>er</i></p>                        |  <p><b>L6</b><br/>60% Yield<br/>88:12 <i>er</i></p>   |  <p><b>L7</b><br/>10% Yield<br/>50:50 <i>er</i></p>   |  <p><b>L8</b><br/>38% Yield<br/>50:50 <i>er</i></p>    |
|  <p><b>L9</b><br/>30% Yield<br/>50:50 <i>er</i></p>                       |  <p><b>L10</b><br/>60% Yield<br/>50:50 <i>er</i></p> |  <p><b>L11</b><br/>22% Yield<br/>50:50 <i>er</i></p> |  <p><b>L12</b><br/>26% Yield<br/>54:46 <i>er</i></p> |

*Reaction conditions:* (a) **1a** (30 mg, 0.13 mmol, 1 equiv), **2a** (2 equiv), Pd(OAc)<sub>2</sub> (10 mol%), **L1** (30 mol%), CsF (1.5 equiv), tert amyl alc (2 mL), air, 35 °C, 18h. (b) Crude yield of **3a** is determined by <sup>1</sup>H NMR with CH<sub>2</sub>Br<sub>2</sub> as an internal standard. (c) *er* of **3a** was determined by HPLC analysis.

## General procedure for the enantioselective synthesis of ferrocene fused isochromans with allenes and dienes

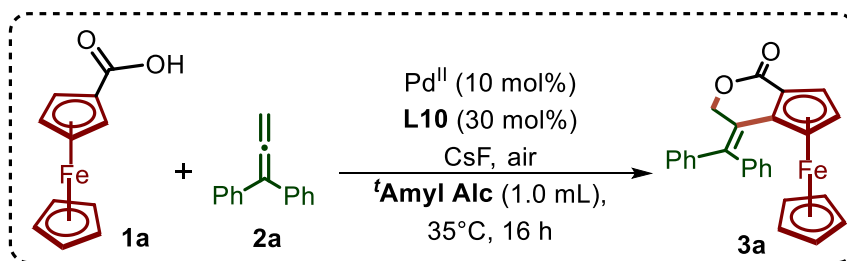

**Scheme S1.** Pd-catalyzed C-H activation oxidative deamination of ferrocene carboxylic acid **1a** with allene **2a**

In a Schlenk tube, Pd(OAc)<sub>2</sub> (6 mg, 0.026 mmol, 10 mol%), **L1** (18 mg, 0.078 mmol, 30 mol %), CsF (50 mg, 0.32 mmol, 1.2 equiv), and ferrocene carboxylic acid **1a** (60 mg, 0.26 mmol, 1 equiv) were added in dry *tert*-amyl alcohol (1.5 mL) under an inert atmosphere and solution was stirred for 10 min. After pre-stirring, allene **2a** (100 μL, 0.52 mmol, 2 equiv) was added to the resulting reaction mixture. The tube was sealed with a rubber septum, and a air atmosphere was maintained in the flask with a balloon. The reaction was stirred at 35 °C, for 18 h. The crude reaction mixture was passed through a celite pad, evaporation, and column chromatography on silica gel (mesh 100-200) using a hexane: ethyl acetate solvent system to afford Chiral ferrocene fused formaldehyde derivative (**3a**).



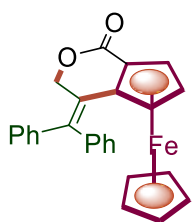

**Chiral ferrocene fused isochroman 3a** was purified on silica gel (mesh 100-200) in (hexanes: ethylacetate; 80:20), obtained as an orange solid, mp:130-131 °C. Yield: 77 mg (70%).  $^1\text{H}$  NMR (400 MHz,  $\text{CDCl}_3$ )  $\delta$  7.40 – 7.33 (m, 6H), 7.21 (s, 2H), 7.13 (d,  $J$  = 7.0 Hz, 2H), 5.46 (d,  $J$  = 12.9 Hz, 1H), 5.05 (d,  $J$  = 12.9 Hz, 1H), 4.97 (s, 1H), 4.39 (s, 1H), 4.30 (s, 5H), 3.62 (s, 1H).  $^{13}\text{C}\{^1\text{H}\}$  NMR (101 MHz,  $\text{CDCl}_3$ )  $\delta$  171.0 (C), 141.5 (C), 140.5 (C), 140.0 (CH), 129.8 (CH), 129.3 (CH), 128.6 (CH), 128.4 (CH), 128.0 (CH), 127.8 (C), 124.7 (C), 84.1 (C), 71.9 (C), 71.3 (CH), 70.9 (CH), 70.0 (CH), 68.0 (CH), 67.6 ( $\text{CH}_2$ ). HRLCMS (ESI)  $m/z$ :  $[\text{M}+\text{H}]^+$  Calcd for  $\text{C}_{26}\text{H}_{21}\text{FeO}_2$  421.0886, found 421.0897. Enantioselectivity 93:7 of **3a** was determined by chiral HPLC analysis on OZ-3 (hexane: isopropanol = 80:20, 1 mL/min,  $\lambda$ =254 nm).

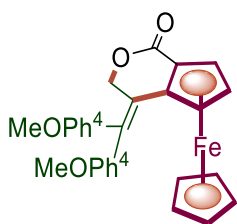

**Chiral ferrocene fused isochroman 3b** was purified on silica gel (mesh 100-200) in (hexanes: ethylacetate; 80:20), obtained as an orange solid, mp:135-136 °C. Yield: 82 mg (66%).  $^1\text{H}$  NMR (400 MHz,  $\text{CDCl}_3$ )  $\delta$  7.09 (d,  $J$  = 8.3 Hz, 2H), 7.02 (d,  $J$  = 8.2 Hz, 2H), 6.88 (dd,  $J$  = 13.0, 8.4 Hz, 4H), 5.46 (d,  $J$  = 12.7 Hz, 1H), 5.05 (d,  $J$  = 12.8 Hz, 1H), 4.96 (s, 1H), 4.40 (t,  $J$  = 2.8 Hz, 1H), 4.29 (s, 5H), 3.85 (s, 6H), 3.73 (s, 1H).  $^{13}\text{C}$  NMR (101 MHz,  $\text{CDCl}_3$ )  $\delta$  171.2 (C), 159.3 (C), 159.2 (C), 139.6 (C), 134.0 (C), 133.3 (CH), 131.3 (CH), 130.8 (CH), 123.0 (CH), 113.8 (C), 113.6 (C), 85.2 (C), 71.6 (C), 71.7 (CH), 70.9 (CH), 70.0 (CH), 67.6 (CH), 67.5 ( $\text{CH}_2$ ), 55.3 ( $\text{CH}_3$ ), 55.2 ( $\text{CH}_3$ ). HRLCMS (ESI)  $m/z$ :  $[\text{M}+\text{H}]^+$  Calcd for  $\text{C}_{28}\text{H}_{25}\text{FeO}_4$  481.1097, found 481.1091. Enantioselectivity 90:10 of **3b** was determined by chiral HPLC analysis on OZ-3 (hexane: isopropanol = 80:20, 1 mL/min,  $\lambda$ =254 nm).

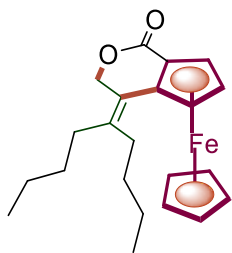

**Chiral ferrocene fused isochroman 3c** was purified on silica gel (mesh 100-200) in (hexanes: ethylacetate; 80:20), obtained as an orange solid, mp:135-136 °C. Yield: 66 mg (70%).  $^1\text{H}$  NMR (700 MHz,  $\text{CDCl}_3$ )  $\delta$  5.59 (s, 1H), 5.09 (s, 1H), 5.04 (dd,  $J = 2.7, 1.3$  Hz, 1H), 4.86 (dd,  $J = 2.6, 1.3$  Hz, 1H), 4.58 (t,  $J = 2.6$  Hz, 1H), 4.21 (s, 5H), 1.97 (tt,  $J = 15.7, 6.5$  Hz, 2H), 1.66 (tt,  $J = 16.2, 6.9$  Hz, 4H), 1.49 – 1.39 (m, 2H), 1.14 (dd,  $J = 21.5, 6.0$  Hz, 4H), 1.00 (t,  $J = 7.4$  Hz, 3H), 0.80 (t,  $J = 7.1$  Hz, 3H).  $^{13}\text{C}$  NMR (176 MHz,  $\text{CDCl}_3$ )  $\delta$  170.7 (C), 141.8 (C), 108.4 (C), 91.0 (C), 83.5 (C), 71.9 (CH), 71.9 (CH), 69.2 (CH), 66.2 (CH), 64.7 ( $\text{CH}_2$ ), 42.9 ( $\text{CH}_2$ ), 37.5 ( $\text{CH}_2$ ), 26.0 ( $\text{CH}_2$ ), 25.9 ( $\text{CH}_2$ ), 23.0 ( $\text{CH}_2$ ), 22.7 ( $\text{CH}_2$ ), 14.1 ( $\text{CH}_3$ ), 13.8 ( $\text{CH}_3$ ). HRLCMS (ESI)  $m/z$ :  $[\text{M}+\text{H}]^+$  Calcd for  $\text{C}_{22}\text{H}_{29}\text{FeO}_2$  381.1512, found 381.1518. Enantioselectivity 85:15 of **3c** was determined by chiral HPLC analysis on OZ-3 (hexane: isopropanol = 90:10, 1 mL/min,  $\lambda=254$  nm).

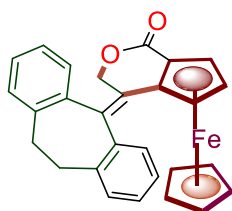

**Chiral ferrocene fused isochroman 3d** was purified on silica gel (mesh 100-200) in (hexanes: ethylacetate; 80:20), obtained as an orange solid, mp:145-146 °C. Yield: 85 mg (68%).  $^1\text{H}$  NMR (400 MHz,  $\text{CDCl}_3$ )  $\delta$  7.24 (dq,  $J = 5.8, 2.9$  Hz, 6H), 7.16 – 7.09 (m, 2H), 5.32 (s, 1H), 5.27 (s, 1H), 5.23 (s, 1H), 4.98 (s, 1H), 4.23 (s, 5H), 3.59 (d,  $J = 3.0$  Hz, 1H), 3.55 – 3.40 (m, 2H), 2.98 (q,  $J = 9.0, 8.2$  Hz, 2H).  $^{13}\text{C}$  NMR (176 MHz,  $\text{CDCl}_3$ )  $\delta$  171.3 (C), 140.0 (C), 139.2 (C), 138.9 (C), 137.7 (CH), 137.5 (CH), 129.9 (CH), 129.4 (CH), 128.0 (CH), 127.9 (CH), 127.8 (CH), 127.3 (CH), 126.4 (CH), 126.3 (C), 124.0 (C), 83.5 (C), 71.8 (C), 70.7 (CH), 70.2 (CH), 70.0 (CH), 68.0 (CH), 67.8 ( $\text{CH}_2$ ), 32.4 ( $\text{CH}_2$ ), 32.0 ( $\text{CH}_2$ ). HRLCMS (ESI)  $m/z$ :  $[\text{M}+\text{H}]^+$  Calcd for  $\text{C}_{28}\text{H}_{23}\text{FeO}_2$  447.1042, found 447.1015. Enantioselectivity 92:8 of **3d** was determined by chiral HPLC analysis on OZ-3 (hexane: isopropanol = 80:20, 1 mL/min,  $\lambda=254$  nm).

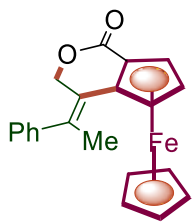

**Chiral ferrocene fused isochroman 3e** was purified on silica gel (mesh 100-200) in (hexanes: ethylacetate; 85:15), obtained as an orange solid, mp:131-132 °C. Yield: 70 mg (71%). <sup>1</sup>H NMR (400 MHz, CDCl<sub>3</sub>) δ 7.40 (d, *J* = 7.5 Hz, 2H), 7.36 (d, *J* = 7.2 Hz, 1H), 7.17 (d, *J* = 7.0 Hz, 2H), 5.09 (dd, *J* = 12.6, 0.9 Hz, 1H), 5.05 (d, *J* = 1.6 Hz, 1H), 4.90 (d, *J* = 1.4 Hz, 1H), 4.78 (d, *J* = 12.6 Hz, 1H), 4.69 (t, *J* = 2.5 Hz, 1H), 4.32 (s, 5H), 2.33 (s, 3H). <sup>13</sup>C NMR (176 MHz, CDCl<sub>3</sub>) δ 171.2 (C), 142.3 (C), 136.9 (CH), 128.5 (CH), 127.8 (CH), 127.6 (C), 122.8 (C), 84.7 (C), 71.7 (C), 71.1 (CH), 71.0 (CH), 70.8 (CH), 70.0 (CH), 68.5 (CH<sub>2</sub>), 22.6 (CH<sub>3</sub>). HRLCMS (ESI) *m/z*: [M+H]<sup>+</sup> Calcd for C<sub>28</sub>H<sub>23</sub>FeO<sub>2</sub> 359.0729, found 359.0703. Enantioselectivity 92:8 of **3e** was determined by chiral HPLC analysis on OD-H (hexane: isopropanol = 95:5, 1 mL/min, λ=254 nm).

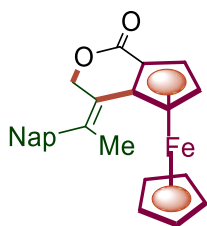

**Chiral ferrocene fused isochroman 3f** was purified on silica gel (mesh 100-200) in (hexanes: ethylacetate; 85:15), obtained as an orange solid, mp:135-136 °C. Yield: 70 mg (66%). <sup>1</sup>H NMR (400 MHz, CDCl<sub>3</sub>) δ 7.94 – 7.84 (m, 3H), 7.60 (s, 1H), 7.58 – 7.52 (m, 2H), 7.33 (d, *J* = 8.4 Hz, 1H), 5.16 (d, *J* = 12.6 Hz, 1H), 5.08 (d, *J* = 3.0 Hz, 1H), 4.94 (d, *J* = 2.9 Hz, 1H), 4.85 (d, *J* = 12.6 Hz, 1H), 4.72 (t, *J* = 3.1 Hz, 1H), 4.37 (s, 5H), 4.20 (s, 1H), 2.42 (s, 3H). <sup>13</sup>C NMR (176 MHz, CDCl<sub>3</sub>) δ 171.2 (C), 139.7 (C), 136.8 (C), 133.0 (CH), 132.6(CH), 128.3 (CH), 127.9 (CH), 127.7 (CH), 126.6 (CH), 126.5 (CH), 126.3 (CH), 125.8 (C), 123.3 (C), 84.7 (C), 71.8 (C), 71.2 (CH), 71.1 (CH), 70.9 (CH), 70.0 (CH), 68.6 (CH), 67.1 (CH<sub>2</sub>), 22.6 (CH<sub>3</sub>). HRLCMS (ESI) *m/z*: [M+H]<sup>+</sup> Calcd for C<sub>25</sub>H<sub>21</sub>FeO<sub>2</sub> 409.0886, found 409.0884. Enantioselectivity 92:8 of **3f** was determined by chiral HPLC analysis on OZ-3 (hexane: isopropanol = 80:20, 1 mL/min, λ=254 nm).

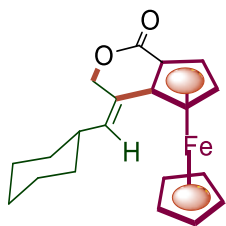

**Chiral ferrocene fused isochroman 3g** was purified on silica gel (mesh 100-200) in (hexanes: ethylacetate; 85:15), obtained as an orange solid, mp:125-126 °C. Yield: 72 mg (68%).  $^1\text{H}$  NMR (700 MHz,  $\text{CDCl}_3$ )  $\delta$  5.54 (d,  $J$  = 2.1 Hz, 1H), 5.18 (d,  $J$  = 2.1 Hz, 1H), 5.05 (dd,  $J$  = 2.6, 1.2 Hz, 1H), 4.84 (dd,  $J$  = 2.6, 1.2 Hz, 1H), 4.75 (dt,  $J$  = 4.1, 2.1 Hz, 1H), 4.58 (t,  $J$  = 2.6 Hz, 1H), 4.21 (s, 5H), 2.17 – 2.04 (m, 1H), 1.95 – 1.86 (m, 2H) 1.68 – 1.57 (m, 2H), 1.49 – 1.41 (m, 2H), 1.39 – 1.27 (m, 4H).  $^{13}\text{C}$  NMR (176 MHz,  $\text{CDCl}_3$ )  $\delta$  170.8 (C), 137.7 (C), 109.0 (CH), 86.0 (C), 84.1 (C), 72.3 (CH), 71.9 (CH), 69.3 (CH), 65.8 (CH), 39.6 ( $\text{CH}_2$ ), 26.6 (CH), 26.4 ( $\text{CH}_2$ ), 26.2 ( $\text{CH}_2$ ), 26.2 ( $\text{CH}_2$ ). HRLCMS (ESI)  $m/z$ :  $[\text{M}+\text{H}]^+$  Calcd for  $\text{C}_{25}\text{H}_{21}\text{FeO}_2$  409.0886, found 409.0884. Enantioselectivity 93:7 of **3g** was determined by chiral HPLC analysis on OZ-3 (hexane: isopropanol = 90:10, 1 mL/min,  $\lambda$ =254 nm).

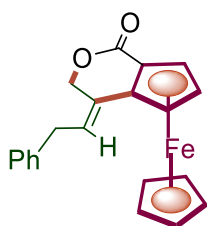

**Chiral ferrocene fused isochroman 3h** was purified on silica gel (mesh 100-200) in (hexanes: ethylacetate; 85:15), obtained as an orange solid, mp:125-126 °C. Yield: 59 mg (63%).  $^1\text{H}$  NMR (400 MHz,  $\text{CDCl}_3$ )  $\delta$  7.32 – 7.26 (m, 3H), 7.24 (d,  $J$  = 6.9 Hz, 1H), 7.18 (d,  $J$  = 7.3 Hz, 2H), 5.42 (s, 1H), 5.33 (t,  $J$  = 6.5 Hz, 1H), 5.01 (s, 2H), 4.84 (s, 1H), 4.59 (s, 1H), 4.20 (s, 5H), 3.18 (dd,  $J$  = 13.9, 6.5 Hz, 1H), 3.03 (dd,  $J$  = 13.9, 6.6 Hz, 1H).  $^{13}\text{C}$  NMR (126 MHz,  $\text{CDCl}_3$ )  $\delta$  169.9, 138.7, 136.4, 129.6, 128.3, 126.7, 109.6, 83.7, 82.8, 72.1, 71.9, 69.2, 66.5, 42.0. HRLCMS (ESI)  $m/z$ :  $[\text{M}+\text{H}]^+$  calcd for  $\text{C}_{21}\text{H}_{19}\text{FeO}_2$  359.0729, found 359.0749. Enantioselectivity 89:11 of **3h** was determined by chiral HPLC analysis on OZ-3 (hexane: isopropanol = 90:10, 1 mL/min,  $\lambda$ =254 nm).

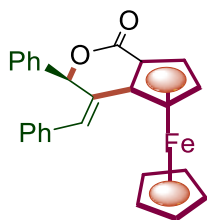

**Chiral ferrocene fused isochroman 3i** was purified on silica gel (mesh 100-200) in (hexanes: ethylacetate; 80:20), obtained as an orange solid, mp:126-127 °C. Yield: 68 mg (62%).  $^1\text{H}$  NMR (400 MHz,  $\text{CDCl}_3$ )  $\delta$  7.48 (d,  $J$  = 7.1 Hz, 2H), 7.45 – 7.35 (m, 5H), 7.34 – 7.27 (m, 3H), 6.43 (s, 1H), 6.31 (s, 1H), 5.18 – 4.96 (m, 1H), 4.47 (d,  $J$  = 15.6 Hz, 1H), 4.28 (s, 6H).  $^{13}\text{C}$   $\{^1\text{H}\}$  NMR (176 MHz,  $\text{CDCl}_3$ )  $\delta$  170.7 (C), 137.6 (C), 136.5 (C), 132.7 (C), 129.5 (CH), 128.6 (CH), 128.5 (CH), 128.3 (CH), 127.9 (CH), 127.6 (C), 85.7 (CH), 82.1 (C), 72.0 (C), 72.2 (CH), 71.6 (CH), 70.2 (CH), 68.5 (CH), 67.4 (CH). HRLCMS (ESI)  $m/z$ :  $[\text{M}+\text{H}]^+$  calcd for  $\text{C}_{26}\text{H}_{21}\text{FeO}_2$  421.0886, found 421.0892.

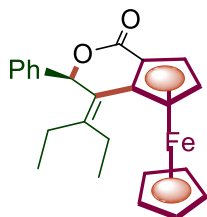

**Chiral ferrocene fused isochroman 3j** was purified on silica gel (mesh 100-200) in (hexanes: ethylacetate; 80:20), obtained as an orange solid, mp:134-135 °C. Yield: 54 mg (52%).  $^1\text{H}$  NMR (400 MHz,  $\text{CDCl}_3$ )  $\delta$  7.49 (t,  $J$  = 7.4 Hz, 2H), 7.40 (d,  $J$  = 7.6 Hz, 3H), 6.67 (s, 1H), 5.02 (d,  $J$  = 2.7 Hz, 1H), 4.35 (d,  $J$  = 2.8 Hz, 1H), 4.17 (s, 5H), 3.86 (d,  $J$  = 3.0 Hz, 1H), 2.11 (dq,  $J$  = 22.0, 7.4 Hz, 2H), 1.84 (dd,  $J$  = 7.5, 3.4 Hz, 2H), 1.29 (t,  $J$  = 7.2 Hz, 3H), 0.86 (t,  $J$  = 7.4 Hz, 3H).  $^{13}\text{C}$  NMR (176 MHz,  $\text{CDCl}_3$ )  $\delta$  171.1 (C), 138.2 (C), 134.3 (CH), 128.6 (CH), 128.5 (CH), 127.5 (C), 126.2 (C), 91.7 (CH), 81.3 (C), 72.3 (C), 72.0 (CH), 71.9 (CH), 69.9 (CH), 68.8 (CH), 36.5 ( $\text{CH}_2$ ), 30.2 ( $\text{CH}_2$ ), 8.7 ( $\text{CH}_3$ ), 8.5 ( $\text{CH}_3$ ). HRLCMS (ESI)  $m/z$ :  $[\text{M}+\text{H}]^+$  calcd for  $\text{C}_{24}\text{H}_{25}\text{FeO}_2$  401.1196, found 401.1199.

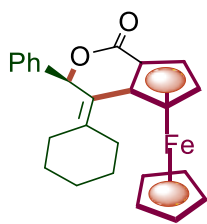

**Chiral ferrocene fused isochroman 3k** was purified on silica gel (mesh 100-200) in (hexanes: ethylacetate; 80:20), obtained as an orange solid, mp:143-144 °C. Yield: 53 mg (50%). <sup>1</sup>H NMR (400 MHz, CDCl<sub>3</sub>) δ 7.48 (d, *J* = 7.8 Hz, 2H), 7.39 (t, *J* = 6.6 Hz, 3H), 6.87 (s, 1H), 5.05 – 4.96 (m, 1H), 4.36 (t, *J* = 2.7 Hz, 1H), 4.08 (s, 5H), 3.96 (dd, *J* = 2.7, 1.3 Hz, 1H), 2.29 (dd, *J* = 12.7, 2.3 Hz, 1H), 2.19 – 2.04 (m, 3H), 1.79 (tdq, *J* = 10.6, 7.1, 3.5 Hz, 4H), 1.58 – 1.48 (m, 1H), 1.44 (td, *J* = 13.4, 4.3 Hz, 1H). <sup>13</sup>C NMR (176 MHz, CDCl<sub>3</sub>) δ 170.6 (C), 139.7 (C), 138.1 (CH), 128.6 (CH), 128.4 (CH), 127.4 (CH), 125.2 (C), 86.0 (C), 81.2 (C), 72.3 (CH), 72.2 (CH), 70.8 (CH), 69.0 (CH), 64.9 (CH), 39.5 (CH<sub>2</sub>), 34.9 (CH<sub>2</sub>), 25.2 (CH<sub>2</sub>), 21.6 (CH<sub>2</sub>), 21.5 (CH<sub>2</sub>). HRLCMS (ESI) *m/z*: [M+H]<sup>+</sup> for C<sub>25</sub>H<sub>25</sub>FeO<sub>2</sub> 413.1199, found 413.1223.

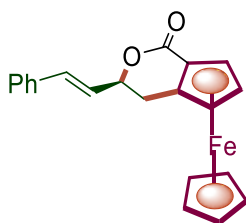

**Chiral ferrocene fused isochroman 3l** was purified on silica gel (mesh 100-200) in (hexanes: ethylacetate; 80:20), obtained as an orange solid, mp:130-131 °C. Yield: 58 mg (62%). <sup>1</sup>H NMR (400 MHz, CDCl<sub>3</sub>) δ 7.38 (t, *J* = 7.4 Hz, 3H), 7.34 – 7.29 (m, 2H), 6.85 (d, *J* = 16.1 Hz, 1H), 6.48 – 6.36 (m, 1H), 5.64 – 5.49 (m, 1H), 4.89 (d, *J* = 1.6 Hz, 1H), 4.54 (t, *J* = 2.5 Hz, 1H), 4.50 (s, 1H), 4.35 (s, 5H), 2.79 (dd, *J* = 15.5, 3.6 Hz, 1H), 2.60 (dd, *J* = 15.4, 11.9 Hz, 1H). <sup>13</sup>C NMR (101 MHz, CDCl<sub>3</sub>) δ 170.9 (C), 136.0 (C), 132.5 (CH), 128.7 (CH), 128.2 (CH), 126.7 (CH), 126.5 (CH), 88.0 (C), 80.4 (C), 71.5 (CH), 70.6 (CH), 70.2 (CH), 67.1 (CH), 66.7 (CH), 29.6 (CH<sub>2</sub>). HRLCMS (ESI) *m/z*: [M+H]<sup>+</sup> for C<sub>21</sub>H<sub>18</sub>FeO<sub>2</sub> 359.0729, found 359.0716.

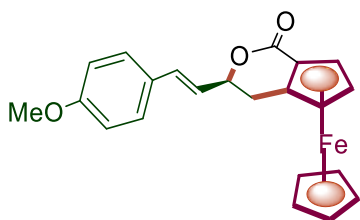

**Chiral ferrocene fused isochroman 3m** was purified on silica gel (mesh 100-200) in (hexanes: ethylacetate; 80:20), obtained as an orange solid, mp:136-137 °C. Yield: 60 mg (59%). <sup>1</sup>H NMR (400 MHz, CDCl<sub>3</sub>) δ 7.39 (d, *J* = 8.8 Hz, 2H), 6.91 (d, *J* = 8.8 Hz, 2H), 6.78 (d, *J* = 15.8 Hz, 1H), 6.26 (dd, *J* = 15.9, 6.4 Hz, 1H), 5.59 – 5.46 (m, 1H), 4.88 (d, *J* = 3.0 Hz, 1H), 4.54 (t, *J* = 2.7 Hz, 1H), 4.49 (d, *J* = 2.9 Hz, 1H), 4.34 (s, 5H), 3.85 (s, 3H), 2.77 (dd, *J* = 15.5, 3.6 Hz, 1H), 2.60 (dd, *J* = 15.5, 11.9 Hz, 1H). <sup>13</sup>C NMR (176 MHz, CDCl<sub>3</sub>) δ 171.0 (C), 159.7 (C), 132.2 (CH), 128.7 (CH), 127.9 (CH), 124.2 (CH), 114.1 (CH), 88.1 (C), 80.7 (C), 70.6 (CH), 70.2 (CH), 69.1 (CH), 66.7 (CH), 60.4 (CH), 55.3 (CH<sub>3</sub>), 29.7 (CH<sub>2</sub>). HRLCMS (ESI) *m/z*: [M+H]<sup>+</sup> for C<sub>22</sub>H<sub>21</sub>FeO<sub>3</sub> 389.0835, found 389.0830.

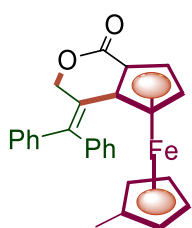

**Chiral ferrocene fused isochroman 3n** was purified on silica gel (mesh 100-200) in (hexanes: ethylacetate; 80:20), obtained as an orange solid, mp:144-145 °C. Yield: 66 mg (58%). <sup>1</sup>H NMR (400 MHz, CDCl<sub>3</sub>) δ 7.36 (m, 6H), 7.20 (dd, *J* = 6.4, 2.9 Hz, 2H), 7.13 (d, *J* = 6.3 Hz, 2H), 5.46 (d, *J* = 13.0 Hz, 1H), 5.05 (d, *J* = 13.0 Hz, 1H), 4.89 (d, *J* = 3.0 Hz, 1H), 4.33 (t, *J* = 2.9 Hz, 1H), 4.19 (brs, 2H), 4.15 (brs, 2H), 3.49 (d, *J* = 3.0 Hz, 1H), 1.94 (s, 3H). <sup>13</sup>C NMR (176 MHz, CDCl<sub>3</sub>) δ 170.8 (C), 141.7 (C), 140.5 (C), 139.7 (C), 129.8 (CH), 129.2 (CH), 128.6 (CH), 128.4 (CH), 127.9 (CH), 127.7 (CH), 124.7 (C), 86.4 (C), 83.9 (C), 72.8 (C), 71.9 (CH), 71.8 (CH), 71.2 (CH), 71.0 (CH), 70.4 (CH), 70.2 (CH), 68.7 (CH), 67.9 (CH<sub>2</sub>), 13.5 (CH<sub>3</sub>). HRLCMS (ESI) *m/z*: [M+H]<sup>+</sup> calcd for C<sub>27</sub>H<sub>23</sub>FeO<sub>2</sub> 435.1042, found 435.1053. Enantioselectivity 90:10 of **3n** was determined by chiral HPLC analysis on OZ-3 (hexane: isopropanol = 80:20, 1 mL/min, λ=254 nm).

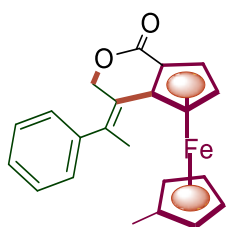

**Chiral ferrocene fused isochroman 3o** was purified on silica gel (mesh 100-200) in (hexanes: ethylacetate; 80:20), obtained as an orange solid, mp:141-142 °C. Yield: 50 mg (51%). <sup>1</sup>H NMR (400 MHz, CDCl<sub>3</sub>) δ 7.69 (d, *J* = 8.0 Hz, 2H), 7.47 (t, *J* = 7.6 Hz, 2H), 7.39 (d, *J* = 6.4

Hz, 1H), 5.52 (s, 1H), 5.04 (s, 1H), 4.98 (d,  $J = 2.8$  Hz, 1H), 4.71 (d,  $J = 2.8$  Hz, 1H), 4.55 (t,  $J = 2.6$  Hz, 1H), 3.83 (d,  $J = 2.5$  Hz, 4H), 1.87 (s, 3H), 1.85 (s, 3H).  $^{13}\text{C}$  NMR (176 MHz,  $\text{CDCl}_3$ )  $\delta$  170.6 (C), 143.2 (C), 128.4 (C), 128.2 (CH), 125.8 (CH), 124.8 (CH), 111.0 (C), 83.9 (C), 73.3 (C), 72.9 (C), 72.5 (CH), 71.5 (CH), 70.0 (CH), 68.1 (CH), 66.8 (CH), 65.3 ( $\text{CH}_2$ ), 29.9 ( $\text{CH}_3$ ), 12.8 ( $\text{CH}_3$ ). HRLCMS (ESI)  $m/z$ :  $[\text{M}+\text{H}]^+$  calcd for  $\text{C}_{22}\text{H}_{21}\text{FeO}_2$  373.0886, found 373.1002. Enantioselectivity 93:7 of **3o** was determined by chiral HPLC analysis on OX-3 (hexane: isopropanol = 70:30, 1 mL/min,  $\lambda=254$  nm).

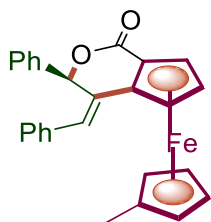

**Chiral ferrocene fused isochroman 3p** was purified on silica gel (mesh 100-200) in (hexanes: ethylacetate; 80:20), obtained as an orange solid, mp:141-142 °C. Yield: 55 mg (48%).  $^1\text{H}$  NMR (400 MHz,  $\text{CDCl}_3$ )  $\delta$  7.52 – 7.47 (m, 3H), 7.45 – 7.39 (m, 5H), 7.37 (dd,  $J = 5.9, 2.6$  Hz, 2H), 6.41 (s, 1H), 6.30 (s, 1H), 4.99 – 4.95 (m, 1H), 4.43 (t,  $J = 2.6$  Hz, 1H), 4.15 (d,  $J = 1.9$  Hz, 2H), 4.12 (d,  $J = 8.9$  Hz, 2H), 3.87 (s, 1H), 1.91 (s, 3H).  $^{13}\text{C}$  NMR (176 MHz,  $\text{CDCl}_3$ )  $\delta$  170.5 (C), 137.7 (C), 136.6 (C), 132.6 (C), 129.2 (CH), 128.6 (CH), 128.4 (CH), 128.4 (CH), 128.0 (CH), 127.6 (CH), 86.5 (CH), 85.6 (C), 82.0 (C), 73.0 (C), 72.5 (CH), 72.3 (CH), 71.0 (CH), 70.9 (CH), 70.7 (CH), 69.2 (CH), 12.9 ( $\text{CH}_3$ ). HRLCMS (ESI)  $m/z$ :  $[\text{M}+\text{H}]^+$  calcd for  $\text{C}_{27}\text{H}_{23}\text{FeO}_2$  435.1042, found 435.1031.

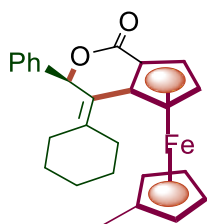

**Chiral ferrocene fused isochroman 3q** was purified on silica gel (mesh 100-200) in (hexanes: ethylacetate; 80:20), obtained as an orange solid, mp:146-147 °C. Yield: 49 mg (44%).  $^1\text{H}$  NMR (400 MHz,  $\text{CDCl}_3$ )  $\delta$  7.47 (d,  $J = 7.3$  Hz, 2H), 7.44 – 7.32 (m, 3H), 6.85 (s, 1H), 5.00 – 4.85 (m, 1H), 4.31 (t,  $J = 2.7$  Hz, 1H), 3.99 – 3.93 (m, 2H), 3.94 – 3.87 (m, 3H), 2.26 (dt,  $J = 9.6, 2.8$  Hz, 1H), 2.18 (t,  $J = 4.4$  Hz, 1H), 2.13 – 2.01 (m, 2H), 1.83 (s, 3H), 1.77 (dt,  $J = 12.8, 3.5$  Hz, 3H), 1.58 – 1.50 (m, 2H), 1.44 (td,  $J = 13.4, 4.4$  Hz, 1H).  $^{13}\text{C}$  NMR (176 MHz,  $\text{CDCl}_3$ )  $\delta$  170.0 (C), 139.4 (C), 138.1 (C), 128.6 (CH), 128.4 (CH), 127.3 (CH), 124.7 (CH), 86.3 (C),



86.0 (C), 81.2 (CH), 73.9 (CH), 72.9 (CH), 72.2 (CH), 71.8 (CH), 70.9 (CH), 70.8 (CH), 69.7 (CH), 65.6 (CH), 39.9 (CH<sub>2</sub>), 34.8 (CH<sub>2</sub>), 25.2 (CH<sub>2</sub>), 21.6 (CH<sub>2</sub>), 21.5 (CH<sub>2</sub>), 12.1 (CH<sub>3</sub>). HRLCMS (ESI)  $m/z$ :  $[M+H]^+$  calcd for C<sub>26</sub>H<sub>27</sub>FeO<sub>2</sub> 427.1355, found 427.1365.

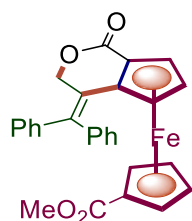

**Chiral ferrocene fused isochroman 3r** was purified on silica gel (mesh 100-200) in (hexanes: ethylacetate; 70:30), obtained as an orange solid, mp:149-150 °C. Yield: 39 mg (30%). <sup>1</sup>H NMR (400 MHz, CDCl<sub>3</sub>)  $\delta$  7.42 – 7.30 (m, 6H), 7.23 – 7.12 (m, 4H), 5.56 (d,  $J$  = 13.1 Hz, 1H), 5.07 (d,  $J$  = 13.1 Hz, 1H), 4.94 (s, 2H), 4.81 (s, 1H), 4.48 (dd,  $J$  = 15.8, 2.4 Hz, 2H), 4.40 (t,  $J$  = 2.8 Hz, 1H), 3.82 (s, 3H), 3.55 (d,  $J$  = 3.1 Hz, 1H). <sup>13</sup>C NMR (176 MHz, CDCl<sub>3</sub>)  $\delta$  170.1 (C), 169.6 (C), 141.8 (C), 141.3 (C), 140.2 (C), 129.7 (CH), 129.5 (CH), 128.6 (CH), 128.4 (CH), 128.2 (CH), 127.9 (CH), 123.2 (C), 85.7 (C), 74.3 (C), 73.3 (C), 73.2 (CH), 73.1 (CH), 72.9 (CH), 72.1 (CH), 71.1 (CH), 68.9 (CH), 68.6 (CH), 60.4 (CH<sub>2</sub>), 52.0 (CH<sub>3</sub>). HRLCMS (ESI)  $m/z$ :  $[M+Na]^+$  calcd for C<sub>28</sub>H<sub>22</sub>FeO<sub>4</sub>Na 501.0760, found 501.0744. Enantioselectivity 95:5 of **3r** was determined by chiral HPLC analysis on OX-3 (hexane: isopropanol = 70:30, 1 mL/min,  $\lambda$ =254 nm).

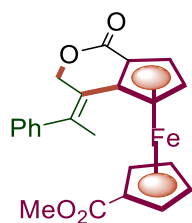

**Chiral ferrocene fused isochroman 3s** was purified on silica gel (mesh 100-200) in (hexanes: ethylacetate; 70:30), obtained as an orange solid, mp:146-147 °C. Yield: 32 mg (28%). <sup>1</sup>H NMR (400 MHz, CDCl<sub>3</sub>)  $\delta$  7.71 (d,  $J$  = 8.1 Hz, 2H), 7.50 (t,  $J$  = 7.8 Hz, 2H), 7.41 (t,  $J$  = 7.3 Hz, 1H), 5.59 (s, 1H), 5.13 (s, 1H), 5.08 (d,  $J$  = 3.1 Hz, 1H), 4.75 (d,  $J$  = 3.1 Hz, 1H), 4.65 (d,  $J$  = 1.6 Hz, 1H), 4.61 (d,  $J$  = 2.8 Hz, 1H), 4.52 (s, 1H), 4.17 (d,  $J$  = 3.1 Hz, 1H), 4.00 (d,  $J$  = 3.1 Hz, 1H), 3.79 (s, 3H), 1.86 (s, 3H). <sup>13</sup>C NMR (176 MHz, CDCl<sub>3</sub>)  $\delta$  170.1 (C), 169.0 (C), 143.0 (C), 142.9 (C), 128.4 (CH), 128.3 (CH), 125.8 (CH), 112.7 (CH), 88.6 (C), 84.8 (C), 75.3 (C), 74.4 (CH), 73.9 (CH), 73.6 (CH), 73.5 (CH), 72.2 (CH), 70.2 (CH), 67.4 (CH), 66.6 (CH<sub>2</sub>), 51.7 (CH<sub>3</sub>), 29.9 (CH<sub>3</sub>). HRLCMS (ESI)  $m/z$ :  $[M+Na]^+$  calcd for C<sub>23</sub>H<sub>20</sub>FeO<sub>4</sub>Na 439.0603,

found 439.0584. Enantioselectivity 95:5 of **3s** was determined by chiral HPLC analysis on OX-3 (hexane: isopropanol = 70:30, 1 mL/min,  $\lambda$ =254 nm).

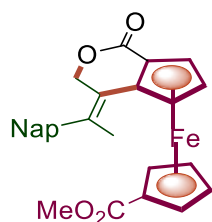

**Chiral ferrocene fused isochroman 3t** was purified on silica gel (mesh 100-200) in (hexanes: ethylacetate; 70:30), obtained as an orange solid, mp:147-148 °C. Yield: 34 mg (27%).  $^1\text{H}$  NMR (400 MHz,  $\text{CDCl}_3$ )  $\delta$  7.90 (t,  $J$  = 7.7 Hz, 3H), 7.69 (s, 1H), 7.61 – 7.51 (m, 2H), 7.40 (d,  $J$  = 8.5 Hz, 1H), 5.21 (d,  $J$  = 14.5 Hz, 1H), 5.08 (d,  $J$  = 3.4 Hz, 1H), 4.96 (d,  $J$  = 5.0 Hz, 1H), 4.88 (d,  $J$  = 13.0 Hz, 1H), 4.74 (t,  $J$  = 2.7 Hz, 1H), 4.59 (t,  $J$  = 3.3 Hz, 1H), 4.55 (t,  $J$  = 3.3 Hz, 1H), 3.82 (s, 3H), 2.39 (s, 3H).  $^{13}\text{C}$  NMR (176 MHz,  $\text{CDCl}_3$ )  $\delta$  171.2 (C), 169.9 (C), 139.5 (C), 138.6 (C), 133.0 (C), 132.6 (C), 128.4 (CH), 128.0 (CH), 127.7 (CH), 126.9 (CH), 126.6 (CH), 126.4 (CH), 125.9 (CH), 121.5 (C), 86.0 (C), 74.4 (C), 73.7 (C), 73.3 (CH), 73.1 (CH), 72.1 (CH), 71.0 (CH), 70.9 (CH), 69.4 (CH), 68.3 (CH), 60.4 ( $\text{CH}_2$ ), 51.9 ( $\text{CH}_3$ ), 22.8 ( $\text{CH}_3$ ). HRLCMS (ESI)  $m/z$ :  $[\text{M}+\text{Na}]^+$  calcd for  $\text{C}_{27}\text{H}_{22}\text{FeO}_4\text{Na}$  489.0760, found 489.0763. Enantioselectivity 96:4 of **3t** was determined by chiral HPLC analysis on OX-3 (hexane: isopropanol = 70:30, 1 mL/min,  $\lambda$ =254 nm).

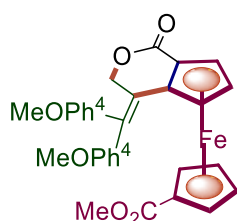

**Chiral ferrocene fused isochroman 3u** was purified on silica gel (mesh 100-200) in (hexanes: ethylacetate; 70:30), obtained as an orange solid, mp:149-150 °C. Yield: 35 mg (25%).  $^1\text{H}$  NMR (700 MHz,  $\text{CDCl}_3$ )  $\delta$  7.10 (d,  $J$  = 8.8 Hz, 2H), 7.05 (d,  $J$  = 8.8 Hz, 2H), 6.91 (d,  $J$  = 8.8 Hz, 2H), 6.86 (d,  $J$  = 8.8 Hz, 2H), 5.56 (d,  $J$  = 12.8 Hz, 1H), 5.08 (d,  $J$  = 12.8 Hz, 1H), 4.98 – 4.94 (m, 1H), 4.94 – 4.92 (m, 1H), 4.83 – 4.78 (m, 1H), 4.53 – 4.49 (m, 1H), 4.49 – 4.45 (m, 1H), 4.42 (t,  $J$  = 2.6 Hz, 1H), 3.85 (s, 3H), 3.85 (s, 3H), 3.82 (s, 3H), 3.67 (dd,  $J$  = 2.7, 1.3 Hz, 1H).  $^{13}\text{C}$  NMR (176 MHz,  $\text{CDCl}_3$ )  $\delta$  170.2 (C), 169.8 (C), 159.5 (C), 159.3 (C), 141.5 (C), 133.9 (CH), 133.0 (CH), 131.3 (CH), 131.1 (CH), 121.3 (CH), 113.8 (CH), 113.6 (C), 86.7 (C), 74.2 (C), 73.2 (C), 73.2 (CH), 72.9 (CH), 72.8 (CH), 71.9 (CH), 71.5 (CH), 71.1 (CH), 68.8

(CH), 68.2 (CH<sub>2</sub>), 55.4 (CH<sub>3</sub>), 55.3 (CH<sub>3</sub>), 55.2 (CH<sub>3</sub>). HRLCMS (ESI)  $m/z$ : [M+H]<sup>+</sup> calcd for C<sub>30</sub>H<sub>27</sub>FeO<sub>6</sub> 539.1142., found 539.1152. Enantioselectivity 95:5 of **3u** was determined by chiral HPLC analysis on OX-3 (hexane: isopropanol = 70:30, 1 mL/min,  $\lambda$ =254 nm).

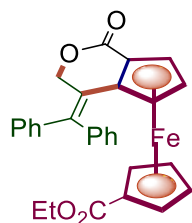

**Chiral ferrocene fused isochroman 3v** was purified on silica gel (mesh 100-200) in (hexanes: ethylacetate; 70:30), obtained as an orange solid, mp:155-156 °C. Yield: 24 mg (20%). <sup>1</sup>H NMR (400 MHz, CDCl<sub>3</sub>)  $\delta$  7.46 – 7.29 (m, 6H), 7.23 – 7.10 (m, 4H), 5.57 (d,  $J$  = 13.1 Hz, 1H), 5.06 (d,  $J$  = 13.1 Hz, 1H), 4.95 (d,  $J$  = 2.6 Hz, 2H), 4.83 (d,  $J$  = 2.6 Hz, 1H), 4.58 – 4.44 (m, 2H), 4.41 (t,  $J$  = 2.7 Hz, 1H), 4.29 (q,  $J$  = 7.1 Hz, 2H), 3.58 (d,  $J$  = 2.6 Hz, 1H), 1.34 (t,  $J$  = 7.1 Hz, 3H). <sup>13</sup>C NMR (101 MHz, CDCl<sub>3</sub>)  $\delta$  169.6 (C), 141.8 (C), 141.3 (C), 140.3 (C), 129.8 (CH), 129.4 (CH), 128.6 (CH), 128.4 (CH), 128.2 (CH), 127.9 (C), 123.2 (C), 85.7 (C), 74.7 (C), 73.3 (C), 73.2 (CH), 73.0 (CH), 72.7 (CH), 72.1 (CH), 71.1 (CH), 71.1 (CH), 68.6 (CH<sub>2</sub>), 60.9 (CH<sub>2</sub>), 14.4 (CH<sub>3</sub>). HRLCMS (ESI)  $m/z$ : [M+H]<sup>+</sup> calcd for C<sub>27</sub>H<sub>22</sub>FeO<sub>4</sub>Na 489.0760, found 489.0763. Enantioselectivity 96:4 of **3v** was determined by chiral HPLC analysis on OX-3 (hexane: isopropanol = 80:20, 1 mL/min,  $\lambda$ =254 nm).

## Synthesis of 1,2-keto acid Ferrocene Derivative under an Oxidizing Atmosphere

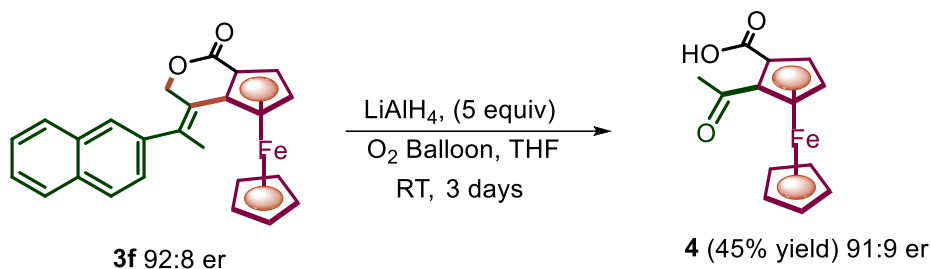

**Scheme 2.** Oxidation under  $\text{LiAlH}_4$ .

In a Schlenk tube, ferrocene fused isochroman **3f** (36 mg, 0.09 mmol, 1 equiv),  $\text{LiAlH}_4$  (18 mg, 0.45 mmol, 5 equiv) was mixed in THF at room temperature and stirred for 3 days under an oxygen atmosphere. The crude reaction mixture was passed through a celite pad, quenched with 1N HCl, evaporation, and column chromatography on silica gel (mesh 230-400) using hexane: ethyl acetate solvent system to afford 1,2-keto acid ferrocene **4** as a yellow solid (mp: 133-134 °C). Yield: 11 mg (45%).  $^1\text{H}$  NMR (400 MHz,  $\text{CDCl}_3$ )  $\delta$  14.27 (s, 1H), 5.59 (d,  $J$  = 3.0 Hz, 1H), 4.98 (d,  $J$  = 1.6 Hz, 1H), 4.91 (t,  $J$  = 3.0 Hz, 1H), 4.40 (s, 5H), 2.61 (s, 3H).  $^{13}\text{C}$  NMR (176 MHz,  $\text{CDCl}_3$ )  $\delta$  208.9 (C), 170.0 (C), 80.1 (C), 75.1 (C), 74.7 (CH), 74.1 (CH), 72.5 (CH), 27.6 ( $\text{CH}_3$ ). HRLCMS (ESI)  $m/z$ :  $[\text{M}+\text{H}]^+$  calcd for  $\text{C}_{13}\text{H}_{13}\text{FeO}_3$  273.0209, found 273.0194. Enantioselectivity 91:9 of **4** was determined by chiral HPLC analysis on AD-H (hexane: isopropanol = 70:30, 1 mL/min,  $\lambda$ =254 nm). We performed HRMS analysis of the reaction mixture and found that within the first two hours the expected alcohol intermediate, (Z)-2-(2-(hydroxymethyl)ferrocenyl)-3-(naphthalen-1-yl)but-2-en-1-ol, is formed, confirming that a normal reduction takes place first. When the reaction was run under  $\text{O}_2$ , we obtained only up to 45% yield of product **4** and no remaining starting material. This indicates that the ferrocene starting material may undergo SET with  $\text{O}_2$  to form reactive  $\text{O}_2^{\bullet-}$  or  $\text{OOH}$ -type species, which then oxidize the alcohol intermediate to product **4**.

# HPLC Traces of Compound 3a-3v and 4

Racemic sample of 3a

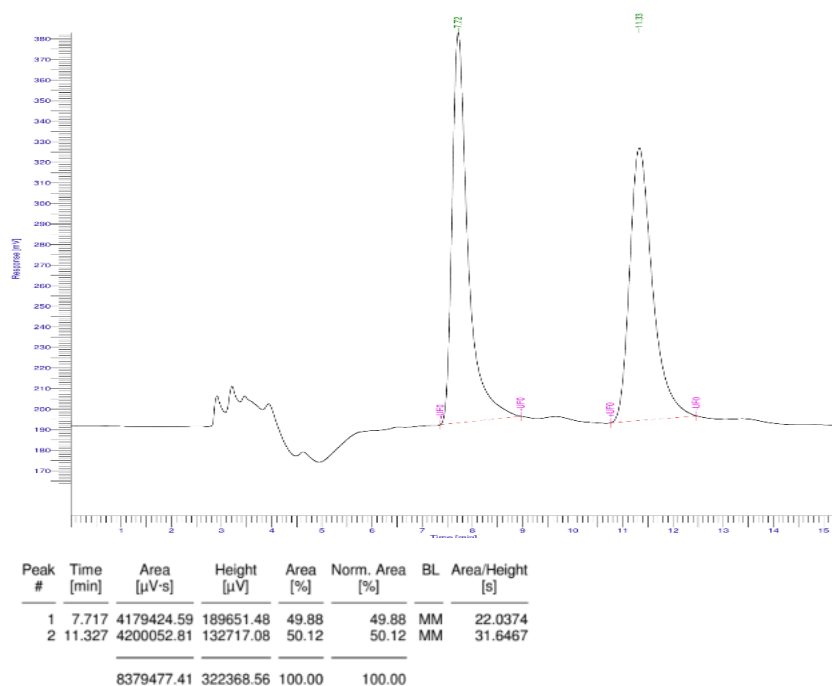

Asymmetric sample of 3a

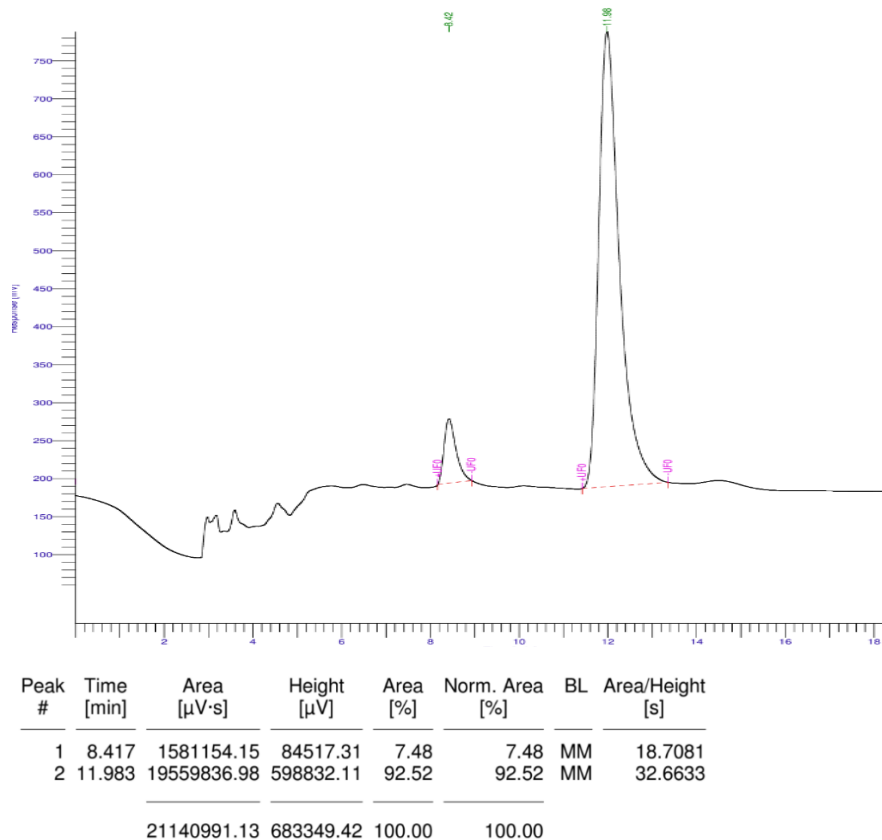

# Racemic sample of **3b**

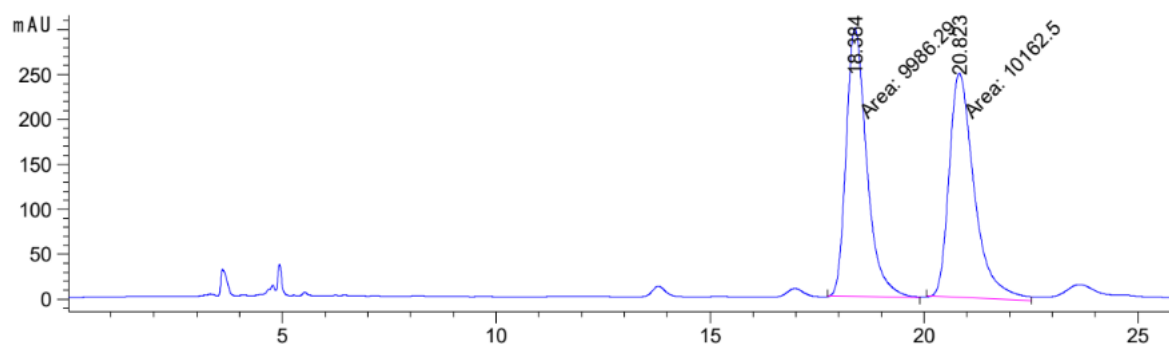

Signal 1: DAD1 A, Sig=254,4 Ref=360,100

| Peak # | RetTime [min] | Type | Width [min] | Area [mAU*s] | Height [mAU] | Area %  |
|--------|---------------|------|-------------|--------------|--------------|---------|
| 1      | 18.384        | MM   | 0.5580      | 9986.28906   | 298.27777    | 49.5628 |
| 2      | 20.823        | MM   | 0.6798      | 1.01625e4    | 249.17084    | 50.4372 |

# Asymmetric sample of **3b**

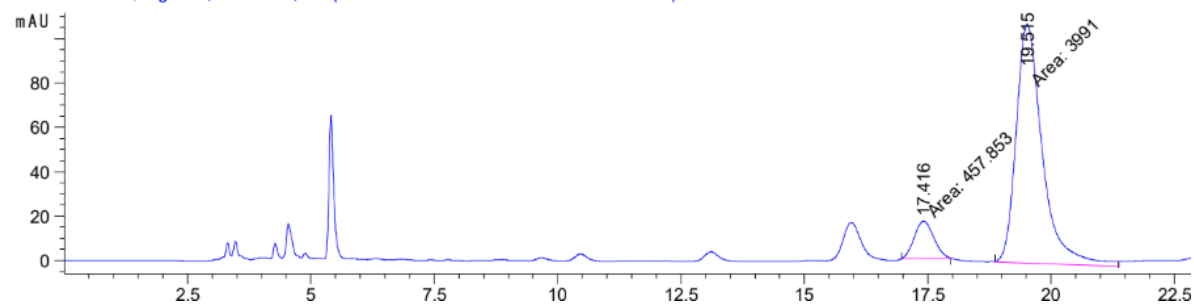

Signal 1: DAD1 A, Sig=254,4 Ref=360,100

| Peak # | RetTime [min] | Type | Width [min] | Area [mAU*s] | Height [mAU] | Area %  |
|--------|---------------|------|-------------|--------------|--------------|---------|
| 1      | 17.416        | MM   | 0.4549      | 457.85303    | 16.77549     | 10.2915 |
| 2      | 19.515        | MM   | 0.6178      | 3990.99658   | 107.66175    | 89.7085 |

# Racemic sample of **3c**

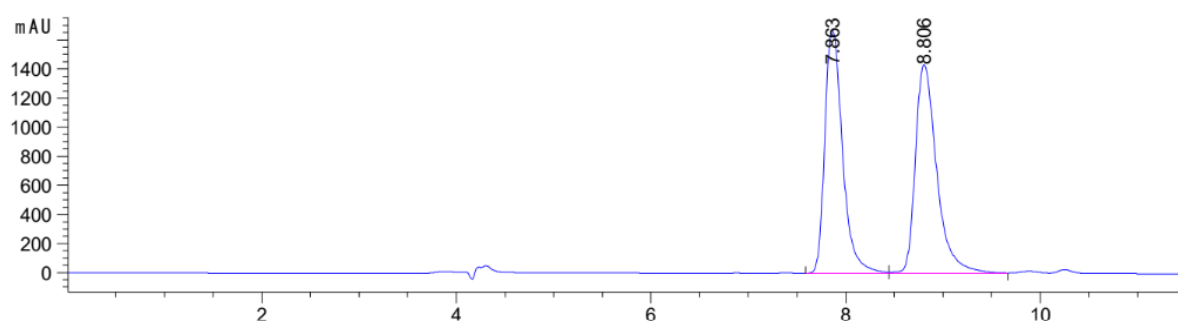

Signal 1: DAD1 A, Sig=254,4 Ref=360,100

| Peak # | RetTime [min] | Type | Width [min] | Area [mAU*s] | Height [mAU] | Area %  |
|--------|---------------|------|-------------|--------------|--------------|---------|
| 1      | 7.863         | VV   | 0.1959      | 2.12638e4    | 1677.84192   | 49.1040 |
| 2      | 8.806         | VV   | 0.2353      | 2.20398e4    | 1434.02454   | 50.8960 |

# Asymmetric sample of **3c**

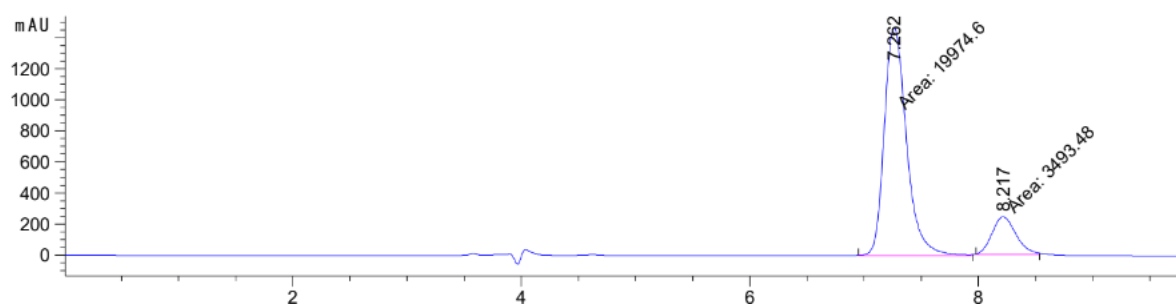

Signal 1: DAD1 A, Sig=254,4 Ref=360,100

| Peak # | RetTime [min] | Type | Width [min] | Area [mAU*s] | Height [mAU] | Area %  |
|--------|---------------|------|-------------|--------------|--------------|---------|
| 1      | 7.262         | MM   | 0.2265      | 1.99746e4    | 1469.91406   | 85.1139 |
| 2      | 8.217         | MM   | 0.2411      | 3493.48438   | 241.52734    | 14.8861 |

# Racemic sample of **3d**

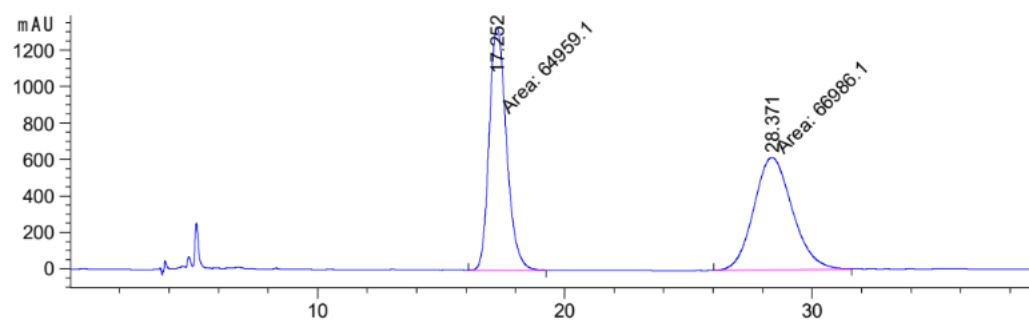

Signal 1: DAD1 A, Sig=254,4 Ref=360,100

| Peak # | RetTime [min] | Type | Width [min] | Area [mAU*s] | Height [mAU] | Area %  |
|--------|---------------|------|-------------|--------------|--------------|---------|
| 1      | 17.252        | MM   | 0.8120      | 6.49591e4    | 1333.29773   | 49.2319 |
| 2      | 28.371        | MM   | 1.8112      | 6.69861e4    | 616.39520    | 50.7681 |

# Asymmetric sample of **3d**

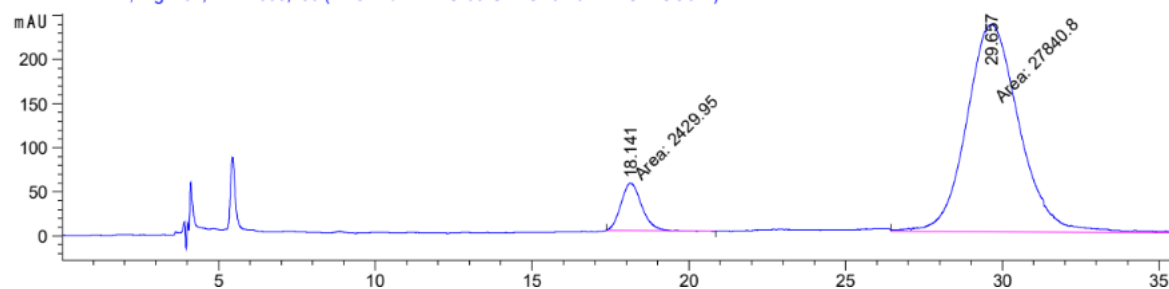

Signal 1: DAD1 A, Sig=254,4 Ref=360,100

| Peak # | RetTime [min] | Type | Width [min] | Area [mAU*s] | Height [mAU] | Area %  |
|--------|---------------|------|-------------|--------------|--------------|---------|
| 1      | 18.141        | MM   | 0.7581      | 2429.94678   | 53.42519     | 8.0274  |
| 2      | 29.657        | MM   | 1.9711      | 2.78408e4    | 235.40468    | 91.9726 |



# Racemic sample of **3e**

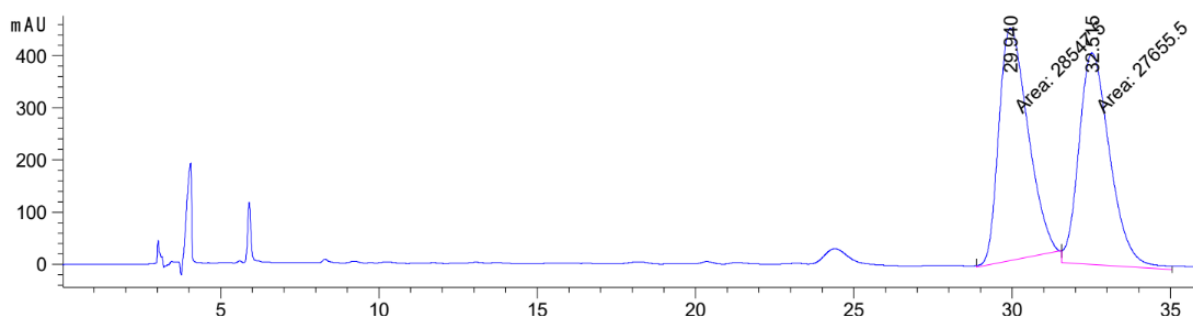

Signal 1: DAD1 A, Sig=254,4 Ref=360,100

| Peak # | RetTime [min] | Type | Width [min] | Area [mAU*s] | Height [mAU] | Area %  |
|--------|---------------|------|-------------|--------------|--------------|---------|
| 1      | 29.940        | MM   | 1.0660      | 2.85475e4    | 446.33585    | 50.7935 |
| 2      | 32.515        | MM   | 1.1365      | 2.76555e4    | 405.57602    | 49.2065 |

# Asymmetric sample of **3e**

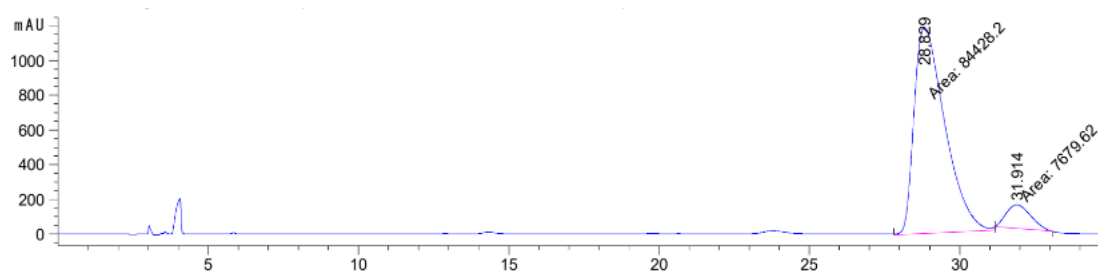

Signal 1: DAD1 A, Sig=254,4 Ref=360,100

| Peak # | RetTime [min] | Type | Width [min] | Area [mAU*s] | Height [mAU] | Area %  |
|--------|---------------|------|-------------|--------------|--------------|---------|
| 1      | 28.829        | MM   | 1.1866      | 8.44282e4    | 1185.87756   | 91.6624 |
| 2      | 31.914        | MM   | 0.9434      | 7679.62061   | 135.67398    | 8.3376  |

# Racemic sample of **3f**

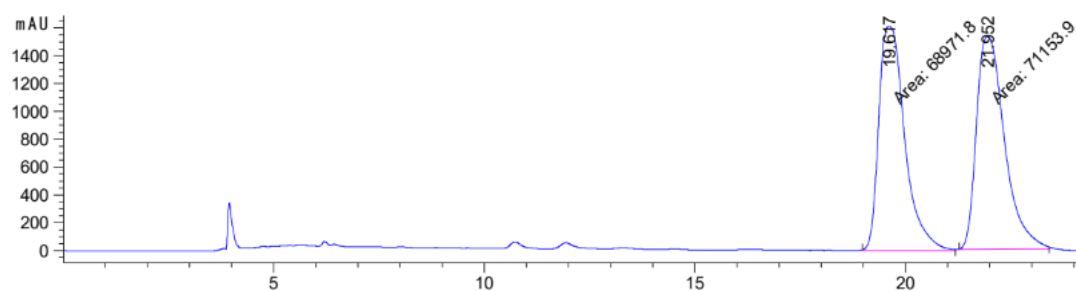

Signal 1: DAD1 A, Sig=254,4 Ref=360,100

| Peak # | RetTime [min] | Type | Width [min] | Area [mAU*s] | Height [mAU] | Area %  |
|--------|---------------|------|-------------|--------------|--------------|---------|
| 1      | 19.617        | MM   | 0.7146      | 6.89718e4    | 1608.73792   | 49.2214 |
| 2      | 21.952        | MM   | 0.7728      | 7.11539e4    | 1534.60779   | 50.7786 |

# Asymmetric sample of **3f**

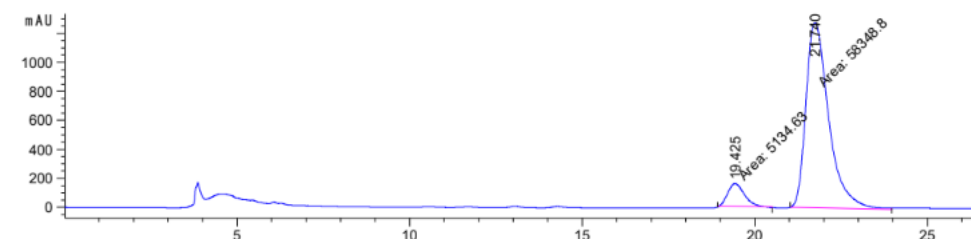

Signal 1: DAD1 A, Sig=254,4 Ref=360,100

| Peak # | RetTime [min] | Type | Width [min] | Area [mAU*s] | Height [mAU] | Area %  |
|--------|---------------|------|-------------|--------------|--------------|---------|
| 1      | 19.425        | MM   | 0.5495      | 5134.63232   | 155.73788    | 8.0881  |
| 2      | 21.740        | MM   | 0.7630      | 5.83488e4    | 1274.47681   | 91.9119 |

# Racemic sample of **3g**

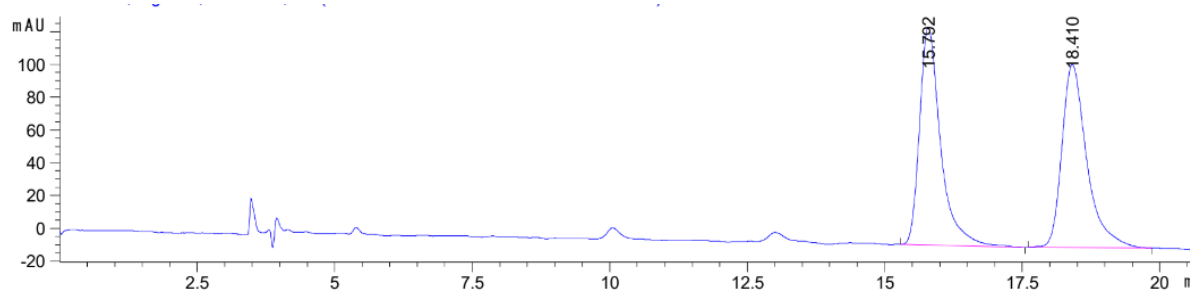

Signal 1: DAD1 A, Sig=254,4 Ref=360,100

| Peak # | RetTime [min] | Type | Width [min] | Area [mAU*s] | Height [mAU] | Area %  |
|--------|---------------|------|-------------|--------------|--------------|---------|
| 1      | 15.792        | BB   | 0.3992      | 3542.21460   | 132.79080    | 50.0887 |
| 2      | 18.410        | BB   | 0.4683      | 3529.66772   | 111.79710    | 49.9113 |

# Asymmetric sample of **3g**

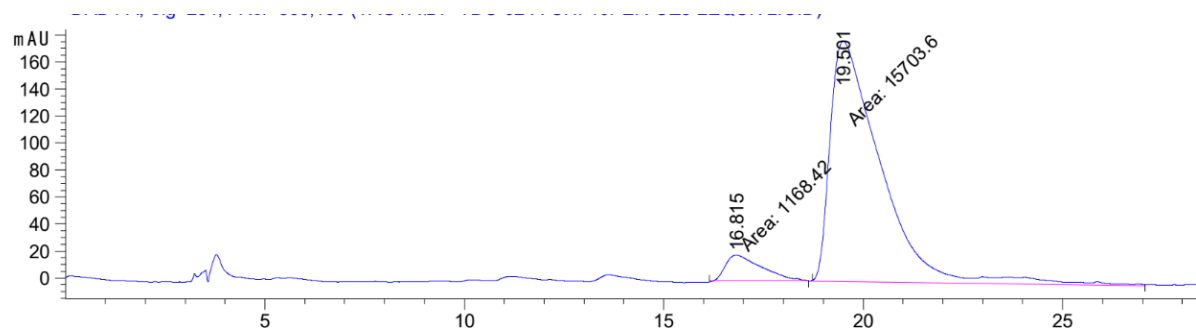

Signal 1: DAD1 A, Sig=254,4 Ref=360,100

| Peak # | RetTime [min] | Type | Width [min] | Area [mAU*s] | Height [mAU] | Area %  |
|--------|---------------|------|-------------|--------------|--------------|---------|
| 1      | 16.815        | MM   | 1.0339      | 1168.41846   | 18.83574     | 6.9252  |
| 2      | 19.501        | MM   | 1.4725      | 1.57036e4    | 177.73994    | 93.0748 |

Racemic sample of **3h**

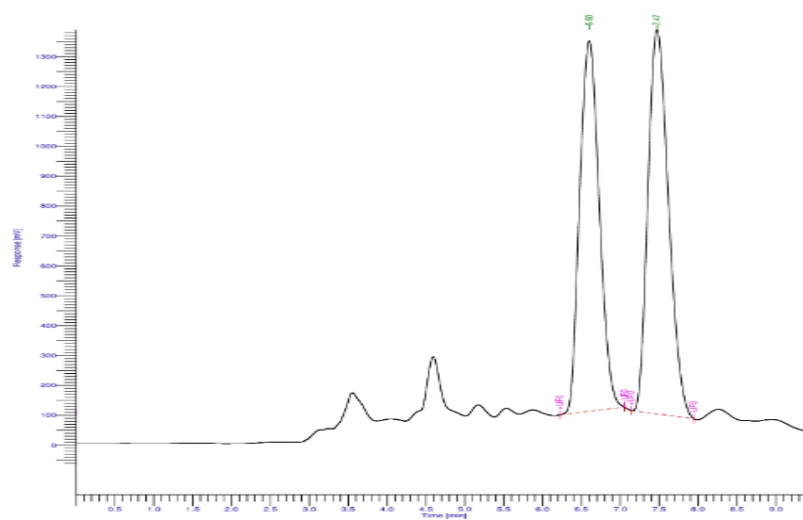

| Peak # | Time [min] | Area [ $\mu\text{V}\cdot\text{s}$ ] | Height [ $\mu\text{V}$ ] | Area [%] | Norm. Area [%] | BL | Area/Height [s] |
|--------|------------|-------------------------------------|--------------------------|----------|----------------|----|-----------------|
| 1      | 6.600      | 21641411.77                         | 1.24e+06                 | 47.82    | 47.82          | MM | 17.4633         |
| 2      | 7.472      | 23616896.12                         | 1.28e+06                 | 52.18    | 52.18          | MM | 18.3803         |

Asymmetric sample of **3h**

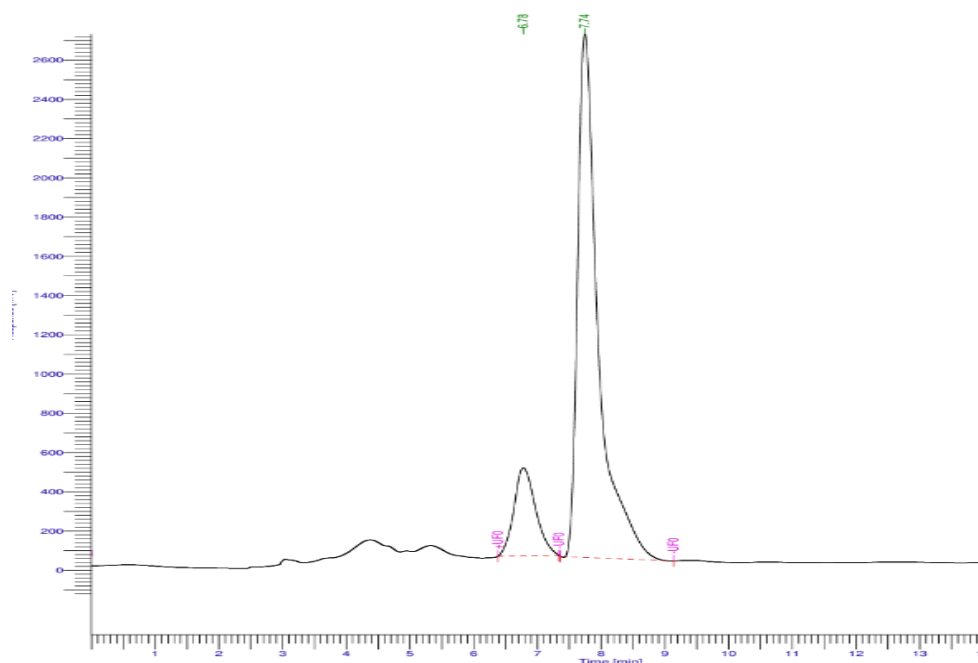

| Peak # | Time [min] | Area [ $\mu\text{V}\cdot\text{s}$ ] | Height [ $\mu\text{V}$ ] | Area [%] | Norm. Area [%] | BL | Area/Height [s] |
|--------|------------|-------------------------------------|--------------------------|----------|----------------|----|-----------------|
| 1      | 6.777      | 10631117.70                         | 448279.63                | 15.02    | 15.02          | MM | 23.7154         |
| 2      | 7.743      | 60147770.74                         | 2.67e+06                 | 84.98    | 84.98          | MM | 22.5487         |

# Racemic sample of **3n**

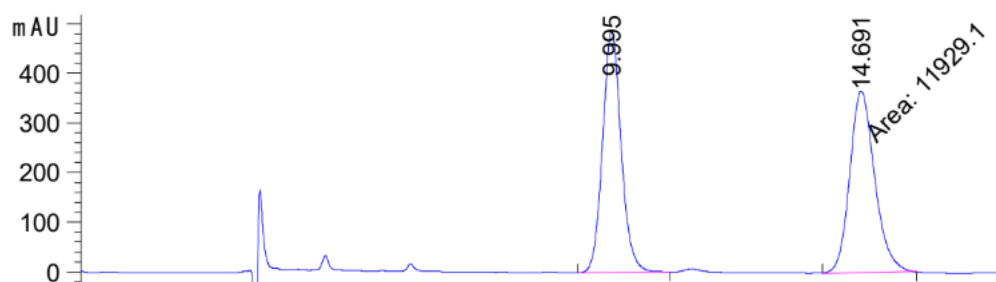

Signal 1: DAD1 A, Sig=254,4 Ref=360,100

| Peak # | RetTime [min] | Type | Width [min] | Area [mAU*s] | Height [mAU] | Area %  |
|--------|---------------|------|-------------|--------------|--------------|---------|
| 1      | 9.995         | BB   | 0.3737      | 1.18431e4    | 487.10690    | 49.8190 |
| 2      | 14.691        | MM   | 0.5435      | 1.19291e4    | 365.79245    | 50.1810 |

# Asymmetric sample of **3n**

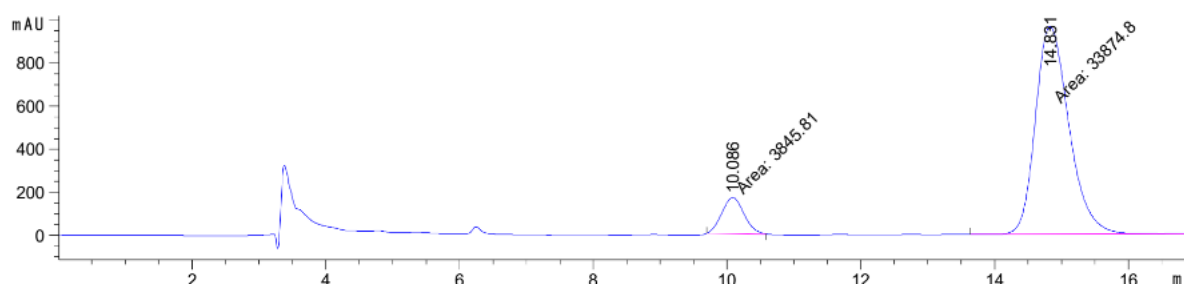

Signal 1: DAD1 A, Sig=254,4 Ref=360,100

| Peak # | RetTime [min] | Type | Width [min] | Area [mAU*s] | Height [mAU] | Area %  |
|--------|---------------|------|-------------|--------------|--------------|---------|
| 1      | 10.086        | MM   | 0.3832      | 3845.80908   | 167.27295    | 10.1955 |
| 2      | 14.831        | MM   | 0.5848      | 3.38748e4    | 965.49963    | 89.8045 |

## Racemic sample of **3o**

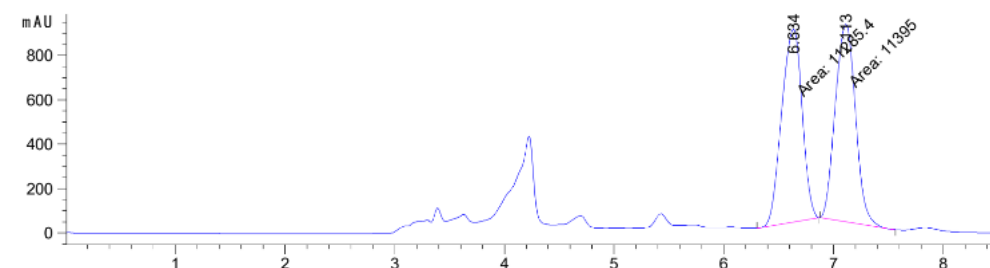

Signal 1: DAD1 A, Sig=254,4 Ref=360,100

| Peak # | RetTime [min] | Type | Width [min] | Area [mAU*s] | Height [mAU] | Area %  |
|--------|---------------|------|-------------|--------------|--------------|---------|
| 1      | 6.634         | MM   | 0.2158      | 1.12854e4    | 871.73309    | 49.7584 |
| 2      | 7.113         | MM   | 0.2134      | 1.13950e4    | 890.00079    | 50.2416 |

## Asymmetric sample of **3o**

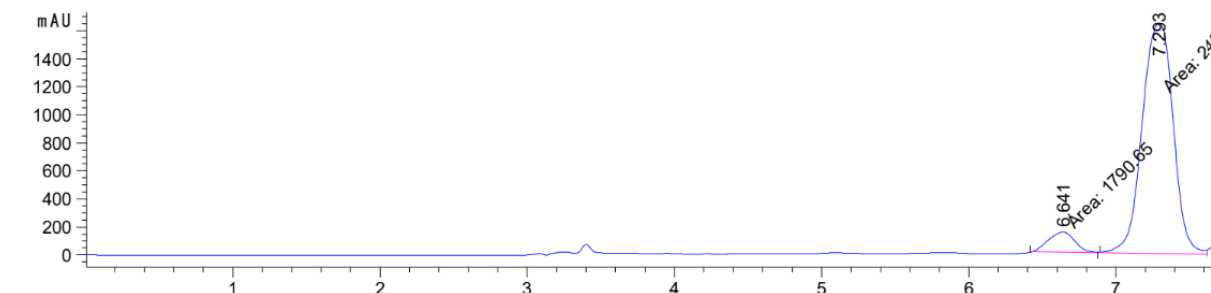

Signal 1: DAD1 A, Sig=254,4 Ref=360,100

| Peak # | RetTime [min] | Type | Width [min] | Area [mAU*s] | Height [mAU] | Area %  |
|--------|---------------|------|-------------|--------------|--------------|---------|
| 1      | 6.641         | MM   | 0.2087      | 1790.64868   | 142.98529    | 6.9395  |
| 2      | 7.293         | MM   | 0.2438      | 2.40130e4    | 1641.29297   | 93.0605 |

# Racemic sample of **3r**

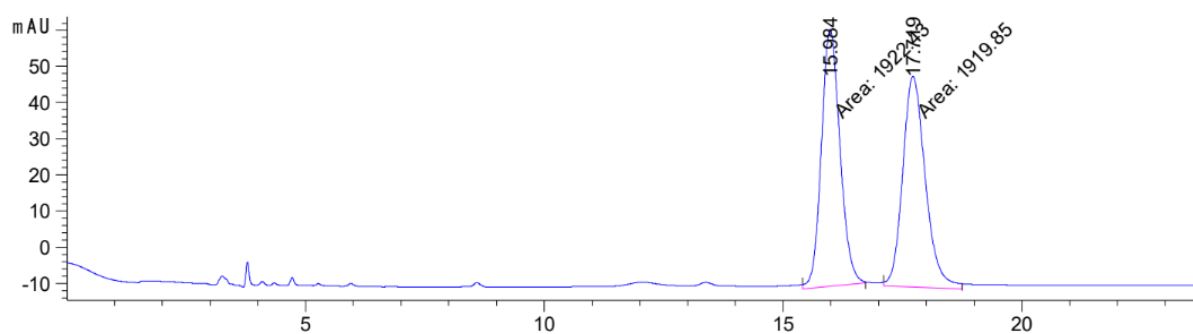

Signal 1: DAD1 A, Sig=254,4 Ref=360,100

| Peak # | RetTime [min] | Type | Width [min] | Area [mAU*s] | Height [mAU] | Area %  |
|--------|---------------|------|-------------|--------------|--------------|---------|
| 1      | 15.984        | MM   | 0.4513      | 1922.43127   | 71.00182     | 50.0336 |
| 2      | 17.719        | MM   | 0.5501      | 1919.85034   | 58.16713     | 49.9664 |

# Asymmetric sample of **3r**

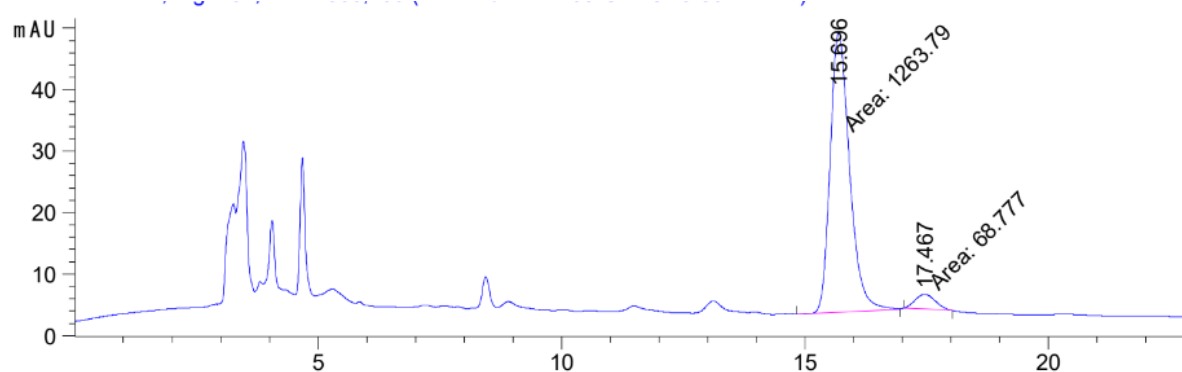

Signal 1: DAD1 A, Sig=254,4 Ref=360,100

| Peak # | RetTime [min] | Type | Width [min] | Area [mAU*s] | Height [mAU] | Area %  |
|--------|---------------|------|-------------|--------------|--------------|---------|
| 1      | 15.696        | MM   | 0.4630      | 1263.79260   | 45.48854     | 94.8388 |
| 2      | 17.467        | MM   | 0.4760      | 68.77698     | 2.40837      | 5.1612  |

# Racemic sample of **3s**

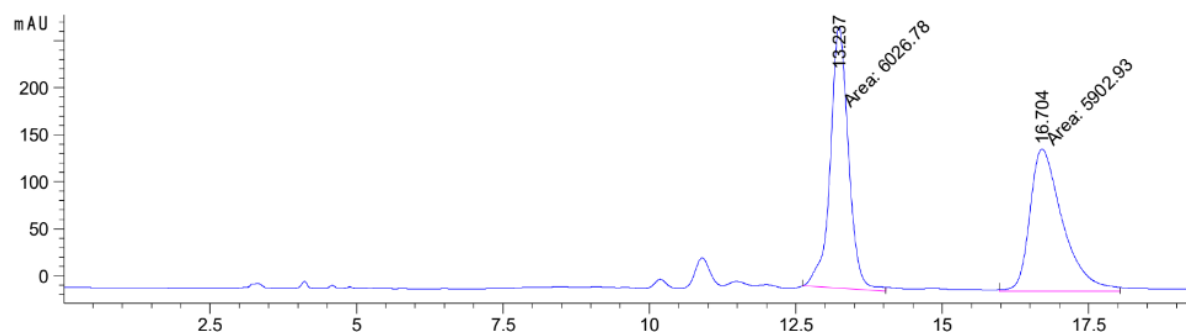

Signal 1: DAD1 A, Sig=254,4 Ref=360,100

| Peak # | RetTime [min] | Type | Width [min] | Area [mAU*s] | Height [mAU] | Area %  |
|--------|---------------|------|-------------|--------------|--------------|---------|
| 1      | 13.237        | MM   | 0.3630      | 6026.77881   | 276.72525    | 50.5191 |
| 2      | 16.704        | MM   | 0.6511      | 5902.93408   | 151.09926    | 49.4809 |

# Asymmetric sample of **3s**

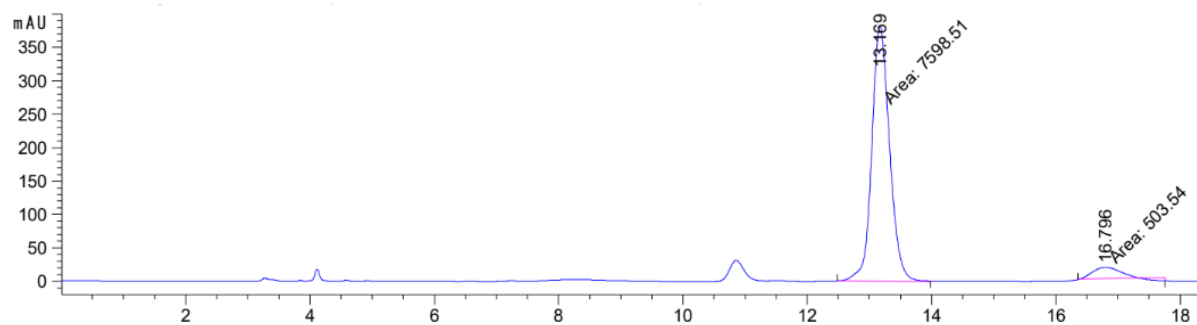

Signal 1: DAD1 A, Sig=254,4 Ref=360,100

| Peak # | RetTime [min] | Type | Width [min] | Area [mAU*s] | Height [mAU] | Area %  |
|--------|---------------|------|-------------|--------------|--------------|---------|
| 1      | 13.169        | MM   | 0.3324      | 7598.51318   | 380.94470    | 93.7850 |
| 2      | 16.796        | MM   | 0.5051      | 503.53983    | 16.61453     | 6.2150  |



# Racemic sample of **3t**

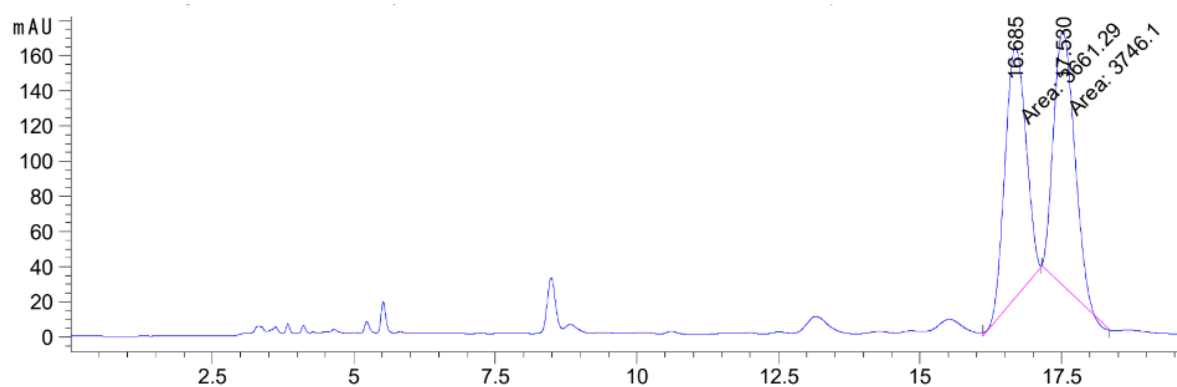

Signal 1: DAD1 A, Sig=254,4 Ref=360,100

| Peak # | RetTime [min] | Type | Width [min] | Area [mAU*s] | Height [mAU] | Area %  |
|--------|---------------|------|-------------|--------------|--------------|---------|
| 1      | 16.685        | MM   | 0.4274      | 3661.29272   | 142.77187    | 49.4275 |
| 2      | 17.530        | MM   | 0.4311      | 3746.10327   | 144.81517    | 50.5725 |

# Asymmetric sample of **3t**

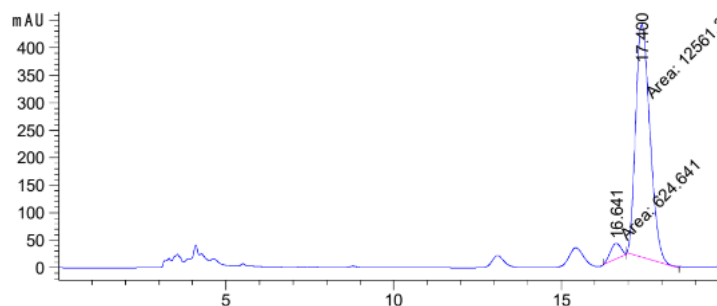

Signal 1: DAD1 A, Sig=254,4 Ref=360,100

| Peak # | RetTime [min] | Type | Width [min] | Area [mAU*s] | Height [mAU] | Area %  |
|--------|---------------|------|-------------|--------------|--------------|---------|
| 1      | 16.641        | MM   | 0.3687      | 624.64081    | 28.23552     | 4.7372  |
| 2      | 17.400        | MM   | 0.4945      | 1.25612e4    | 423.32162    | 95.2628 |

# Racemic sample of **3u**

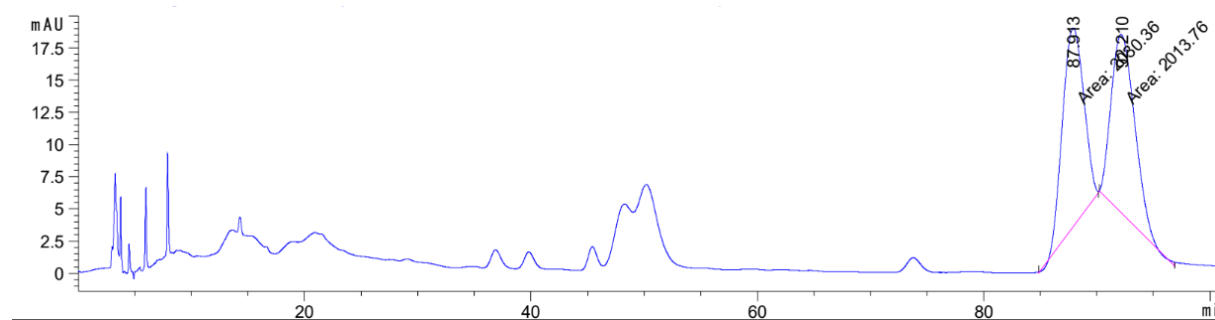

Signal 1: DAD1 A, Sig=254,4 Ref=360,100

| Peak # | RetTime [min] | Type | Width [min] | Area [mAU*s] | Height [mAU] | Area %  |
|--------|---------------|------|-------------|--------------|--------------|---------|
| 1      | 87.913        | MM   | 2.1932      | 2030.36206   | 15.42928     | 50.2053 |
| 2      | 92.210        | MM   | 2.4230      | 2013.75610   | 13.85192     | 49.7947 |

# Asymmetric sample of **3u**

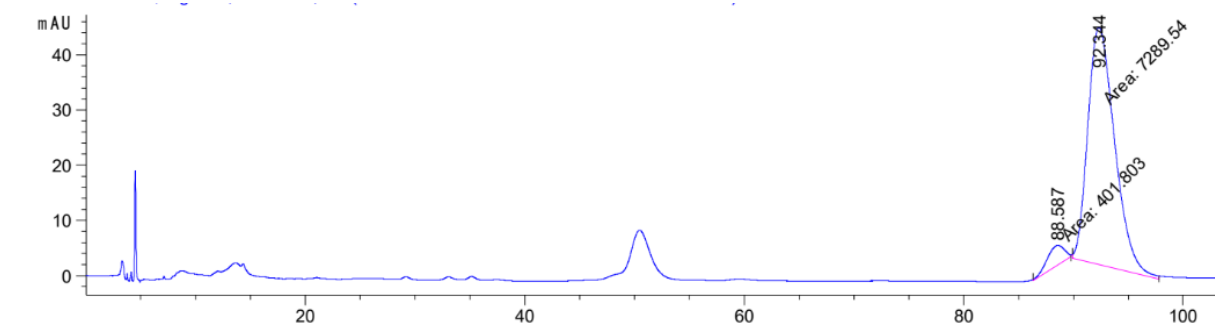

Signal 1: DAD1 A, Sig=254,4 Ref=360,100

| Peak # | RetTime [min] | Type | Width [min] | Area [mAU*s] | Height [mAU] | Area %  |
|--------|---------------|------|-------------|--------------|--------------|---------|
| 1      | 88.587        | MM   | 1.3428      | 401.80289    | 3.53212      | 5.2241  |
| 2      | 92.344        | MM   | 2.8272      | 7289.54004   | 42.97228     | 94.7759 |

## Racemic sample of 3v

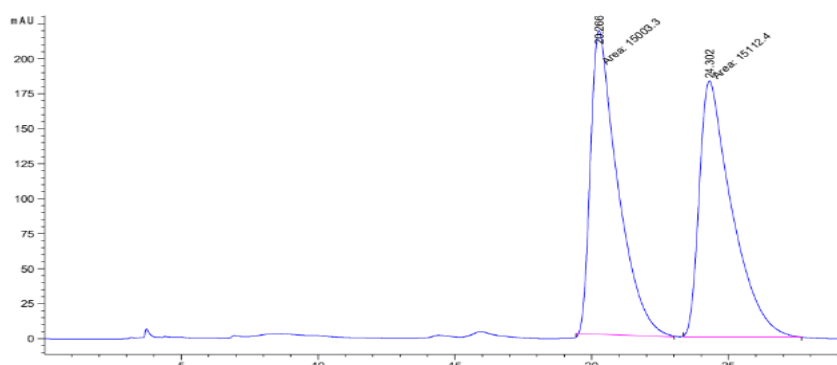

Signal 1: DAD1 A, Sig=254,4 Ref=off

| Peak # | RetTime [min] | Type | Width [min] | Area [mAU*s] | Height [mAU] | Area %  |
|--------|---------------|------|-------------|--------------|--------------|---------|
| 1      | 20.266        | MM   | 1.1534      | 1.50033e4    | 216.79150    | 49.8189 |
| 2      | 24.302        | MM   | 1.3769      | 1.51124e4    | 182.92453    | 50.1811 |

## Asymmetric sample of 3v

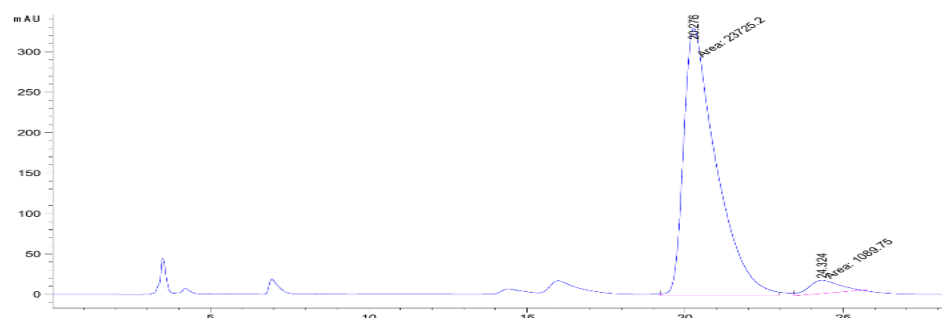

Signal 1: DAD1 A, Sig=254,4 Ref=off

| Peak # | RetTime [min] | Type | Width [min] | Area [mAU*s] | Height [mAU] | Area %  |
|--------|---------------|------|-------------|--------------|--------------|---------|
| 1      | 20.276        | MM   | 1.1937      | 2.37252e4    | 331.26447    | 95.6085 |
| 2      | 24.324        | MM   | 1.1133      | 1089.75183   | 16.31369     | 4.3915  |

## Racemic sample of 4

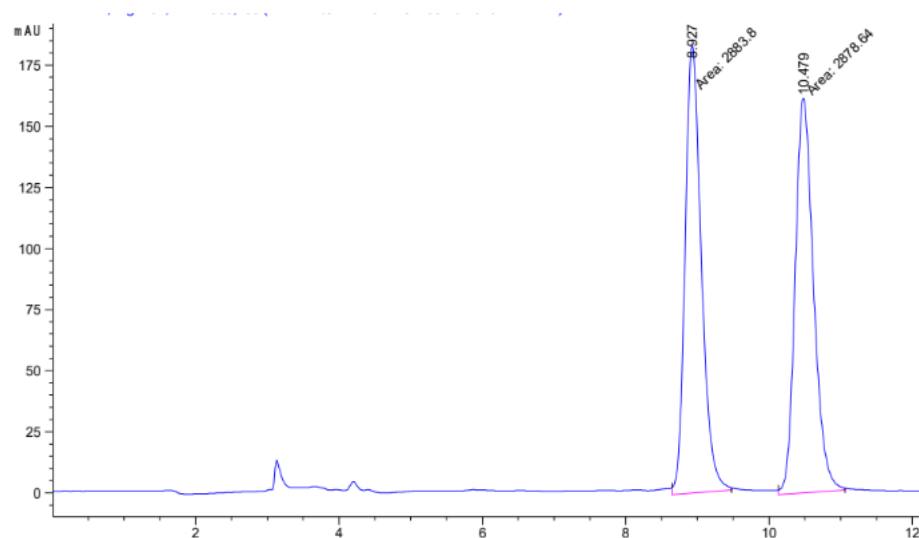

Signal 1: DAD1 A, Sig=254,4 Ref=360,100

| Peak # | RetTime [min] | Type | Width [min] | Area [mAU*s] | Height [mAU] | Area %  |
|--------|---------------|------|-------------|--------------|--------------|---------|
| 1      | 8.927         | MM   | 0.2625      | 2883.80469   | 183.07259    | 50.0449 |
| 2      | 10.479        | MM   | 0.2973      | 2878.63574   | 161.39877    | 49.9551 |

## Asymmetric sample of 4

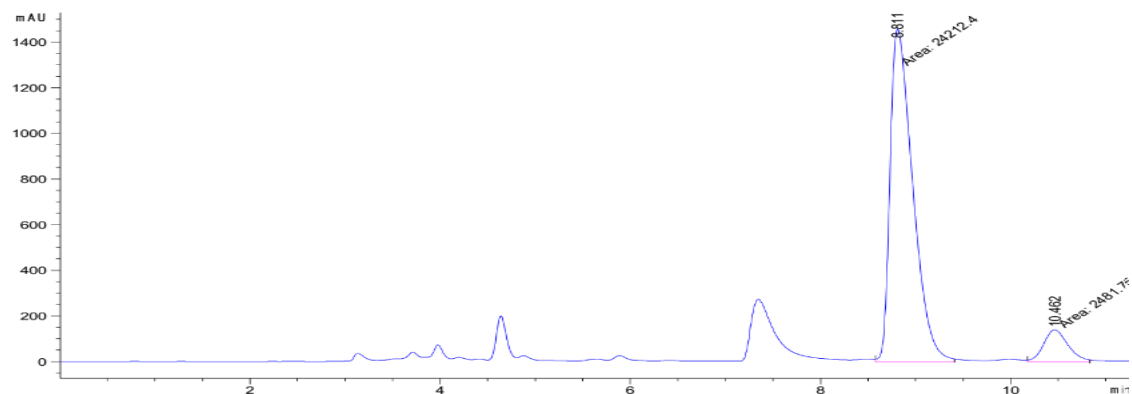

Signal 1: DAD1 A, Sig=254,4 Ref=360,100

| Peak # | RetTime [min] | Type | Width [min] | Area [mAU*s] | Height [mAU] | Area %  |
|--------|---------------|------|-------------|--------------|--------------|---------|
| 1      | 8.811         | MM   | 0.2766      | 2.42124e4    | 1459.03650   | 90.7030 |
| 2      | 10.462        | MM   | 0.2966      | 2481.75464   | 139.46638    | 9.2970  |

## Crystallographic details of compound **3d**

The structures of ferrocene fused tetrahydropyridine (*Sp*)-**3d** (CCDC: 2498520), were confirmed by X-ray structure analysis. We isolated the suitable single crystal by the slow evaporation method in a 1:4 ratio of solvents of Hexane in Dichloromethane

**Table S4** : Crystal data and structure refinement for **3d**.

|                                             |                                                               |
|---------------------------------------------|---------------------------------------------------------------|
| <b>Identification code</b>                  | <b>3d</b>                                                     |
| <b>CCDC No</b>                              | <b>2498520</b>                                                |
| Empirical formula                           | C <sub>28</sub> H <sub>22</sub> FeO <sub>2</sub>              |
| Formula weight                              | 446.30                                                        |
| Temperature/K                               | 140.00                                                        |
| Crystal system                              | orthorhombic                                                  |
| Space group                                 | P2 <sub>1</sub> 2 <sub>1</sub> 2 <sub>1</sub>                 |
| a/Å                                         | 8.2412(6)                                                     |
| b/Å                                         | 11.3911(8)                                                    |
| c/Å                                         | 21.8790(15)                                                   |
| α/°                                         | 90                                                            |
| β/°                                         | 90                                                            |
| γ/°                                         | 90                                                            |
| Volume/Å <sup>3</sup>                       | 2053.9(3)                                                     |
| Z                                           | 4                                                             |
| ρ <sub>calc</sub> /cm <sup>3</sup>          | 1.443                                                         |
| μ/mm <sup>-1</sup>                          | 0.758                                                         |
| F(000)                                      | 928.0                                                         |
| Crystal size/mm <sup>3</sup>                | 0.07 × 0.03 × 0.03                                            |
| Radiation                                   | MoKα (λ = 0.71073)                                            |
| 2θ range for data collection/°              | 4.032 to 49.424                                               |
| Index ranges                                | -9 ≤ h ≤ 9, -13 ≤ k ≤ 13, -25 ≤ l ≤ 25                        |
| Reflections collected                       | 33287                                                         |
| Independent reflections                     | 3508 [R <sub>int</sub> = 0.1151, R <sub>sigma</sub> = 0.0725] |
| Data/restraints/parameters                  | 3508/114/287                                                  |
| Goodness-of-fit on F <sup>2</sup>           | 1.030                                                         |
| Final R indexes [I ≥ 2σ (I)]                | R <sub>1</sub> = 0.0535, wR <sub>2</sub> = 0.1138             |
| Final R indexes [all data]                  | R <sub>1</sub> = 0.0789, wR <sub>2</sub> = 0.1270             |
| Largest diff. peak/hole / e Å <sup>-3</sup> | 0.53/-0.38                                                    |
| Flack parameter                             | -0.02(2)                                                      |

**Table S5** Fractional Atomic Coordinates ( $\times 10^4$ ) and Equivalent Isotropic Displacement Parameters ( $\text{\AA}^2 \times 10^3$ ) for 3d.  $U_{\text{eq}}$  is defined as 1/3 of the trace of the orthogonalised  $U_{ij}$  tensor.

| Atom | <i>x</i>   | <i>y</i>   | <i>z</i>  | <i>U</i> (eq) |
|------|------------|------------|-----------|---------------|
| Fe01 | 8047.7(11) | 2442.4(10) | 7388.9(4) | 35.6(3)       |
| O002 | 3964(6)    | 3606(5)    | 6881(2)   | 47.1(13)      |
| O003 | 3362(6)    | 1835(5)    | 7231(2)   | 55.8(15)      |
| C004 | 6813(10)   | 1074(6)    | 7010(3)   | 38.8(17)      |
| C005 | 10016(10)  | 3239(7)    | 7762(4)   | 51(2)         |
| C006 | 6042(8)    | 2157(6)    | 6890(3)   | 34.8(17)      |
| C007 | 7141(9)    | 2891(6)    | 6553(3)   | 33.9(17)      |
| C008 | 8654(10)   | 4366(6)    | 5540(3)   | 39.6(18)      |
| C009 | 7187(9)    | 4710(6)    | 5898(3)   | 34.6(17)      |
| C00A | 8622(10)   | 3973(7)    | 7821(4)   | 52(2)         |
| C00B | 4377(8)    | 2491(8)    | 7027(3)   | 40.9(16)      |
| C00C | 10184(11)  | 4395(7)    | 5792(4)   | 51(2)         |
| C00D | 6611(9)    | 4061(6)    | 6365(3)   | 36.1(17)      |
| C00E | 8610(9)    | 2233(6)    | 6490(3)   | 38.7(18)      |
| C00F | 8373(9)    | 1124(6)    | 6763(3)   | 42.5(19)      |
| C00G | 6472(10)   | 5844(7)    | 5699(4)   | 47.3(19)      |
| C00H | 9688(11)   | 2195(7)    | 8069(4)   | 58(2)         |
| C00I | 8487(13)   | 4081(7)    | 4923(4)   | 59(2)         |
| C00J | 6542(11)   | 6828(7)    | 6091(5)   | 63(2)         |
| C00K | 5204(9)    | 4481(7)    | 6754(3)   | 45.2(19)      |
| C00L | 7472(10)   | 3350(8)    | 8159(4)   | 55(2)         |
| C00M | 11558(14)  | 4135(8)    | 5470(5)   | 71(3)         |
| C00N | 5865(12)   | 5998(10)   | 5116(4)   | 72(3)         |
| C00O | 8123(11)   | 2249(8)    | 8324(3)   | 62(3)         |
| C00P | 9900(18)   | 3785(9)    | 4608(5)   | 87(3)         |
| C00Q | 5291(15)   | 7129(12)   | 4949(5)   | 98(4)         |
| C00R | 6014(15)   | 7920(10)   | 5886(7)   | 94(3)         |
| C00S | 11379(16)  | 3801(10)   | 4866(6)   | 93(3)         |
| C00U | 5411(18)   | 8025(13)   | 5344(7)   | 114(4)        |
| C1   | 6510(30)   | 4000(16)   | 4716(9)   | 51(5)         |
| C3   | 5860(20)   | 5271(16)   | 4630(7)   | 56(4)         |
| C2   | 7350(30)   | 4229(18)   | 4477(9)   | 56(4)         |
| C4   | 5780(30)   | 4540(20)   | 4728(10)  | 51(5)         |

**Table S6** Anisotropic Displacement Parameters ( $\text{\AA}^2 \times 10^3$ ) for 3d. The Anisotropic displacement factor exponent takes the form:  $-2\pi^2[h^2a^{*2}U_{11}+2hka^*b^*U_{12}+\dots]$ .

| Atom | U <sub>11</sub> | U <sub>22</sub> | U <sub>33</sub> | U <sub>23</sub> | U <sub>13</sub> | U <sub>12</sub> |
|------|-----------------|-----------------|-----------------|-----------------|-----------------|-----------------|
| Fe01 | 34.9(5)         | 40.6(5)         | 31.3(5)         | 3.4(5)          | -0.4(4)         | -0.6(6)         |
| O002 | 36(3)           | 62(3)           | 43(3)           | 8(3)            | 9(3)            | 7(3)            |
| O003 | 37(3)           | 76(4)           | 54(3)           | 8(3)            | 6(3)            | -7(3)           |
| C004 | 51(5)           | 37(4)           | 29(4)           | 8(3)            | 0(4)            | -8(4)           |
| C005 | 39(4)           | 54(5)           | 61(6)           | -3(4)           | -8(4)           | -6(4)           |
| C006 | 41(4)           | 43(5)           | 21(3)           | -5(3)           | -2(3)           | 2(3)            |
| C007 | 38(4)           | 39(4)           | 24(3)           | 1(3)            | 6(3)            | 6(3)            |
| C008 | 61(5)           | 25(3)           | 33(4)           | 1(3)            | 8(3)            | 2(3)            |
| C009 | 41(4)           | 37(4)           | 26(4)           | 4(3)            | -2(3)           | 2(4)            |
| C00A | 59(5)           | 48(4)           | 48(5)           | -4(4)           | -19(4)          | -1(4)           |
| C00B | 40(4)           | 56(4)           | 27(3)           | 1(4)            | -1(3)           | 0(5)            |
| C00C | 59(5)           | 36(4)           | 57(5)           | -7(4)           | 15(4)           | -2(4)           |
| C00D | 42(5)           | 42(4)           | 25(3)           | -2(3)           | 1(3)            | 11(3)           |
| C00E | 39(4)           | 38(5)           | 40(4)           | 2(3)            | 10(3)           | 3(3)            |
| C00F | 45(5)           | 39(4)           | 43(4)           | 4(3)            | 0(4)            | 10(4)           |
| C00G | 49(5)           | 45(4)           | 47(4)           | 15(4)           | 3(4)            | 5(4)            |
| C00H | 56(6)           | 53(6)           | 64(6)           | 2(4)            | -25(5)          | -2(4)           |
| C00I | 99(7)           | 39(4)           | 40(4)           | -5(3)           | 8(4)            | 7(5)            |
| C00J | 54(5)           | 43(4)           | 91(6)           | 0(4)            | -1(5)           | 9(4)            |
| C00K | 46(5)           | 50(5)           | 39(4)           | 4(4)            | 10(4)           | 14(4)           |
| C00L | 42(5)           | 80(7)           | 43(5)           | -23(5)          | -6(4)           | -1(4)           |
| C00M | 68(6)           | 50(4)           | 96(6)           | -9(4)           | 23(5)           | -11(4)          |
| C00N | 61(5)           | 98(6)           | 58(5)           | 30(5)           | 1(4)            | 22(5)           |
| C00O | 66(6)           | 90(8)           | 29(4)           | 14(4)           | -16(4)          | -31(6)          |
| C00P | 134(7)          | 70(5)           | 56(5)           | -14(4)          | 31(5)           | 8(6)            |
| C00Q | 94(6)           | 125(7)          | 74(6)           | 64(5)           | -3(5)           | 30(6)           |
| C00R | 85(6)           | 65(5)           | 133(7)          | 6(5)            | 12(6)           | 13(5)           |
| C00S | 104(7)          | 77(6)           | 97(6)           | 1(5)            | 60(6)           | -2(6)           |
| C00U | 104(7)          | 103(7)          | 134(8)          | 47(6)           | 20(7)           | 29(6)           |
| C1   | 90(17)          | 32(10)          | 31(6)           | -6(8)           | 0(9)            | -13(8)          |
| C3   | 83(11)          | 52(9)           | 33(7)           | 0(6)            | -3(7)           | -11(7)          |
| C2   | 83(11)          | 52(9)           | 33(7)           | 0(6)            | -3(7)           | -11(7)          |
| C4   | 90(17)          | 32(10)          | 31(6)           | -6(8)           | 0(9)            | -13(8)          |

**Table S7** Bond Lengths for 3d.

| Atom | Atom | Length/ $\text{\AA}$ | Atom | Atom | Length/ $\text{\AA}$ |
|------|------|----------------------|------|------|----------------------|
| Fe01 | C004 | 2.038(7)             | C009 | C00D | 1.347(9)             |

|      |      |           |      |      |           |
|------|------|-----------|------|------|-----------|
| Fe01 | C005 | 2.030(8)  | C009 | C00G | 1.485(10) |
| Fe01 | C006 | 2.007(7)  | C00A | C00L | 1.396(11) |
| Fe01 | C007 | 2.040(6)  | C00C | C00M | 1.367(13) |
| Fe01 | C00A | 2.039(8)  | C00D | C00K | 1.516(10) |
| Fe01 | C00E | 2.035(7)  | C00E | C00F | 1.411(10) |
| Fe01 | C00F | 2.051(7)  | C00G | C00J | 1.413(11) |
| Fe01 | C00H | 2.030(8)  | C00G | C00N | 1.380(11) |
| Fe01 | C00L | 2.033(8)  | C00H | C00O | 1.406(12) |
| Fe01 | C00O | 2.058(7)  | C00I | C00P | 1.394(14) |
| O002 | C00B | 1.354(10) | C00I | C1   | 1.69(2)   |
| O002 | C00K | 1.454(9)  | C00I | C2   | 1.36(2)   |
| O003 | C00B | 1.207(9)  | C00J | C00R | 1.393(13) |
| C004 | C006 | 1.412(9)  | C00L | C00O | 1.412(12) |
| C004 | C00F | 1.396(10) | C00M | C00S | 1.382(15) |
| C005 | C00A | 1.426(11) | C00N | C00Q | 1.420(15) |
| C005 | C00H | 1.392(11) | C00N | C3   | 1.348(18) |
| C006 | C007 | 1.436(9)  | C00N | C4   | 1.87(2)   |
| C006 | C00B | 1.455(9)  | C00P | C00S | 1.343(16) |
| C007 | C00D | 1.462(9)  | C00Q | C00U | 1.341(17) |
| C007 | C00E | 1.431(9)  | C00R | C00U | 1.290(17) |
| C008 | C009 | 1.494(11) | C1   | C3   | 1.56(2)   |
| C008 | C00C | 1.377(11) | C2   | C4   | 1.45(4)   |
| C008 | C00I | 1.394(10) |      |      |           |

**Table S8** Bond Angles for **3d**.

| Atom | Atom | Atom | Angle/°  | Atom | Atom | Atom | Angle/°  |
|------|------|------|----------|------|------|------|----------|
| C004 | Fe01 | C007 | 69.2(3)  | C00D | C007 | Fe01 | 126.2(5) |
| C004 | Fe01 | C00A | 163.5(3) | C00E | C007 | Fe01 | 69.3(4)  |
| C004 | Fe01 | C00F | 39.9(3)  | C00E | C007 | C006 | 106.1(5) |
| C004 | Fe01 | C00O | 109.7(3) | C00E | C007 | C00D | 134.7(6) |
| C005 | Fe01 | C004 | 154.8(3) | C00C | C008 | C009 | 121.6(6) |
| C005 | Fe01 | C007 | 122.7(3) | C00C | C008 | C00I | 119.0(8) |
| C005 | Fe01 | C00A | 41.0(3)  | C00I | C008 | C009 | 119.3(8) |
| C005 | Fe01 | C00E | 105.0(3) | C00D | C009 | C008 | 122.6(6) |
| C005 | Fe01 | C00F | 119.5(3) | C00D | C009 | C00G | 124.0(7) |
| C005 | Fe01 | C00L | 68.0(3)  | C00G | C009 | C008 | 113.3(6) |
| C005 | Fe01 | C00O | 67.9(3)  | C005 | C00A | Fe01 | 69.2(4)  |
| C006 | Fe01 | C004 | 40.9(3)  | C00L | C00A | Fe01 | 69.7(5)  |
| C006 | Fe01 | C005 | 161.6(3) | C00L | C00A | C005 | 107.3(7) |



|      |      |      |          |      |      |      |           |
|------|------|------|----------|------|------|------|-----------|
| C006 | Fe01 | C007 | 41.6(3)  | O002 | C00B | C006 | 115.7(7)  |
| C006 | Fe01 | C00A | 125.6(3) | O003 | C00B | O002 | 119.6(7)  |
| C006 | Fe01 | C00E | 69.1(3)  | O003 | C00B | C006 | 124.6(8)  |
| C006 | Fe01 | C00F | 68.0(3)  | C00M | C00C | C008 | 123.1(8)  |
| C006 | Fe01 | C00H | 157.6(3) | C007 | C00D | C00K | 111.0(6)  |
| C006 | Fe01 | C00L | 110.0(3) | C009 | C00D | C007 | 127.5(6)  |
| C006 | Fe01 | C00O | 123.2(3) | C009 | C00D | C00K | 121.5(6)  |
| C007 | Fe01 | C00F | 68.5(3)  | C007 | C00E | Fe01 | 69.6(4)   |
| C007 | Fe01 | C00O | 158.2(3) | C00F | C00E | Fe01 | 70.4(4)   |
| C00A | Fe01 | C007 | 106.6(3) | C00F | C00E | C007 | 108.1(6)  |
| C00A | Fe01 | C00F | 154.9(3) | C004 | C00F | Fe01 | 69.5(4)   |
| C00A | Fe01 | C00O | 67.9(3)  | C004 | C00F | C00E | 109.1(6)  |
| C00E | Fe01 | C004 | 68.3(3)  | C00E | C00F | Fe01 | 69.2(4)   |
| C00E | Fe01 | C007 | 41.1(3)  | C00J | C00G | C009 | 119.7(7)  |
| C00E | Fe01 | C00A | 119.7(3) | C00N | C00G | C009 | 121.7(8)  |
| C00E | Fe01 | C00F | 40.4(3)  | C00N | C00G | C00J | 118.4(8)  |
| C00E | Fe01 | C00O | 160.2(3) | C005 | C00H | Fe01 | 70.0(5)   |
| C00F | Fe01 | C00O | 125.5(3) | C005 | C00H | C00O | 109.4(8)  |
| C00H | Fe01 | C004 | 121.6(3) | C00O | C00H | Fe01 | 71.0(4)   |
| C00H | Fe01 | C005 | 40.1(3)  | C008 | C00I | C1   | 111.5(10) |
| C00H | Fe01 | C007 | 159.3(3) | C00P | C00I | C008 | 116.9(10) |
| C00H | Fe01 | C00A | 67.9(3)  | C00P | C00I | C1   | 131.1(10) |
| C00H | Fe01 | C00E | 122.7(3) | C2   | C00I | C008 | 137.1(13) |
| C00H | Fe01 | C00F | 107.5(3) | C2   | C00I | C00P | 104.5(12) |
| C00H | Fe01 | C00L | 67.6(3)  | C00R | C00J | C00G | 119.9(10) |
| C00H | Fe01 | C00O | 40.2(3)  | O002 | C00K | C00D | 115.4(6)  |
| C00L | Fe01 | C004 | 127.6(3) | C00A | C00L | Fe01 | 70.2(5)   |
| C00L | Fe01 | C007 | 122.0(3) | C00A | C00L | C00O | 109.2(7)  |
| C00L | Fe01 | C00A | 40.1(3)  | C00O | C00L | Fe01 | 70.8(4)   |
| C00L | Fe01 | C00E | 156.0(3) | C00C | C00M | C00S | 117.7(11) |
| C00L | Fe01 | C00F | 163.1(3) | C00G | C00N | C00Q | 118.2(11) |
| C00L | Fe01 | C00O | 40.4(3)  | C00G | C00N | C4   | 108.7(10) |
| C00B | O002 | C00K | 120.8(6) | C00Q | C00N | C4   | 132.7(12) |
| C006 | C004 | Fe01 | 68.4(4)  | C3   | C00N | C00G | 130.7(12) |
| C00F | C004 | Fe01 | 70.5(4)  | C3   | C00N | C00Q | 110.7(11) |
| C00F | C004 | C006 | 107.8(6) | C00H | C00O | Fe01 | 68.8(4)   |
| C00A | C005 | Fe01 | 69.8(4)  | C00H | C00O | C00L | 106.6(7)  |
| C00H | C005 | Fe01 | 69.9(5)  | C00L | C00O | Fe01 | 68.9(4)   |
| C00H | C005 | C00A | 107.5(8) | C00S | C00P | C00I | 123.2(10) |
| C004 | C006 | Fe01 | 70.7(4)  | C00U | C00Q | C00N | 120.1(11) |
| C004 | C006 | C007 | 108.7(6) | C00U | C00R | C00J | 120.0(12) |

|      |      |      |          |      |      |      |           |
|------|------|------|----------|------|------|------|-----------|
| C004 | C006 | C00B | 127.9(7) | C00P | C00S | C00M | 120.1(11) |
| C007 | C006 | Fe01 | 70.4(4)  | C00R | C00U | C00Q | 123.3(13) |
| C007 | C006 | C00B | 123.2(6) | C3   | C1   | C00I | 108.3(14) |
| C00B | C006 | Fe01 | 128.4(5) | C00N | C3   | C1   | 118.4(14) |
| C006 | C007 | Fe01 | 68.0(4)  | C00I | C2   | C4   | 111.9(18) |
| C006 | C007 | C00D | 119.2(6) | C2   | C4   | C00N | 110.7(17) |

**Table S9** Torsion Angles for **3d**.

| A    | B    | C    | D    | Angle/°   | A    | B    | C    | D    | Angle/°    |
|------|------|------|------|-----------|------|------|------|------|------------|
| Fe01 | C004 | C006 | C007 | 60.5(5)   | C00A | C005 | C00H | Fe01 | 60.0(5)    |
| Fe01 | C004 | C006 | C00B | -124.2(7) | C00A | C005 | C00H | C00O | -0.3(9)    |
| Fe01 | C004 | C00F | C00E | -58.0(5)  | C00A | C00L | C00O | Fe01 | -59.9(5)   |
| Fe01 | C005 | C00A | C00L | 59.6(5)   | C00A | C00L | C00O | C00H | -1.2(9)    |
| Fe01 | C005 | C00H | C00O | -60.2(5)  | C00B | O002 | C00K | C00D | 42.2(9)    |
| Fe01 | C006 | C007 | C00D | -120.3(6) | C00B | C006 | C007 | Fe01 | 123.7(6)   |
| Fe01 | C006 | C007 | C00E | 59.1(5)   | C00B | C006 | C007 | C00D | 3.5(10)    |
| Fe01 | C006 | C00B | O002 | 83.0(7)   | C00B | C006 | C007 | C00E | -177.2(6)  |
| Fe01 | C006 | C00B | O003 | -100.5(8) | C00C | C008 | C009 | C00D | -69.5(10)  |
| Fe01 | C007 | C00D | C009 | 120.9(7)  | C00C | C008 | C009 | C00G | 108.9(8)   |
| Fe01 | C007 | C00D | C00K | -61.8(8)  | C00C | C008 | C00I | C00P | 3.1(12)    |
| Fe01 | C007 | C00E | C00F | 60.1(5)   | C00C | C008 | C00I | C1   | 176.0(9)   |
| Fe01 | C00A | C00L | C00O | 60.3(5)   | C00C | C008 | C00I | C2   | -159.6(17) |
| Fe01 | C00E | C00F | C004 | 58.1(5)   | C00C | C00M | C00S | C00P | 2.5(16)    |
| Fe01 | C00H | C00O | C00L | -58.7(5)  | C00D | C007 | C00E | Fe01 | 120.9(8)   |
| Fe01 | C00L | C00O | C00H | 58.7(5)   | C00D | C007 | C00E | C00F | -179.0(7)  |
| C004 | C006 | C007 | Fe01 | -60.6(5)  | C00D | C009 | C00G | C00J | 66.4(11)   |
| C004 | C006 | C007 | C00D | 179.1(6)  | C00D | C009 | C00G | C00N | -119.6(9)  |
| C004 | C006 | C007 | C00E | -1.6(7)   | C00E | C007 | C00D | C009 | 24.7(13)   |
| C004 | C006 | C00B | O002 | 177.8(6)  | C00E | C007 | C00D | C00K | -158.0(7)  |
| C004 | C006 | C00B | O003 | -5.7(11)  | C00F | C004 | C006 | Fe01 | -59.8(5)   |
| C005 | C00A | C00L | Fe01 | -59.2(5)  | C00F | C004 | C006 | C007 | 0.7(8)     |
| C005 | C00A | C00L | C00O | 1.0(9)    | C00F | C004 | C006 | C00B | 176.1(7)   |
| C005 | C00H | C00O | Fe01 | 59.6(6)   | C00G | C009 | C00D | C007 | 173.7(7)   |
| C005 | C00H | C00O | C00L | 0.9(9)    | C00G | C009 | C00D | C00K | -3.3(11)   |
| C006 | C004 | C00F | Fe01 | 58.4(5)   | C00G | C00J | C00R | C00U | 2.3(19)    |
| C006 | C004 | C00F | C00E | 0.5(8)    | C00G | C00N | C00Q | C00U | 2.8(18)    |
| C006 | C007 | C00D | C009 | -156.2(7) | C00G | C00N | C3   | C1   | 5(3)       |
| C006 | C007 | C00D | C00K | 21.1(9)   | C00G | C00N | C4   | C2   | -82.3(19)  |
| C006 | C007 | C00E | Fe01 | -58.2(4)  | C00H | C005 | C00A | Fe01 | -60.0(5)   |

|      |      |      |      |           |      |      |      |      |            |
|------|------|------|------|-----------|------|------|------|------|------------|
| C006 | C007 | C00E | C00F | 1.9(8)    | C00H | C005 | C00A | C00L | -0.5(9)    |
| C007 | C006 | C00B | O002 | -7.5(9)   | C00I | C008 | C009 | C00D | 114.7(8)   |
| C007 | C006 | C00B | O003 | 169.0(6)  | C00I | C008 | C009 | C00G | -66.9(9)   |
| C007 | C00D | C00K | O002 | -42.5(9)  | C00I | C008 | C00C | C00M | -1.3(12)   |
| C007 | C00E | C00F | Fe01 | -59.6(5)  | C00I | C00P | C00S | C00M | -0.7(18)   |
| C007 | C00E | C00F | C004 | -1.5(8)   | C00I | C1   | C3   | C00N | -62(2)     |
| C008 | C009 | C00D | C007 | -8.1(12)  | C00I | C2   | C4   | C00N | 65(2)      |
| C008 | C009 | C00D | C00K | 174.9(7)  | C00J | C00G | C00N | C00Q | -2.1(14)   |
| C008 | C009 | C00G | C00J | -112.0(8) | C00J | C00G | C00N | C3   | 169.9(15)  |
| C008 | C009 | C00G | C00N | 62.1(11)  | C00J | C00G | C00N | C4   | -175.9(11) |
| C008 | C00C | C00M | C00S | -1.6(14)  | C00J | C00R | C00U | C00Q | -2(2)      |
| C008 | C00I | C00P | C00S | -2.2(16)  | C00K | O002 | C00B | O003 | 167.4(6)   |
| C008 | C00I | C1   | C3   | 78.2(15)  | C00K | O002 | C00B | C006 | -15.9(9)   |
| C008 | C00I | C2   | C4   | -16(3)    | C00N | C00G | C00J | C00R | -0.3(15)   |
| C009 | C008 | C00C | C00M | -177.1(7) | C00N | C00Q | C00U | C00R | -1(2)      |
| C009 | C008 | C00I | C00P | 179.0(8)  | C00P | C00I | C1   | C3   | -110.3(15) |
| C009 | C008 | C00I | C1   | -8.2(12)  | C00P | C00I | C2   | C4   | 179.6(16)  |
| C009 | C008 | C00I | C2   | 16(2)     | C00Q | C00N | C3   | C1   | 177.7(16)  |
| C009 | C00D | C00K | O002 | 135.0(7)  | C00Q | C00N | C4   | C2   | 105(2)     |
| C009 | C00G | C00J | C00R | 173.9(9)  | C1   | C00I | C00P | C00S | -173.3(13) |
| C009 | C00G | C00N | C00Q | -176.2(9) | C3   | C00N | C00Q | C00U | -170.7(14) |
| C009 | C00G | C00N | C3   | -4(2)     | C2   | C00I | C00P | C00S | 165.8(14)  |
| C009 | C00G | C00N | C4   | 9.9(14)   | C4   | C00N | C00Q | C00U | 174.8(15)  |

**Table S10** Hydrogen Atom Coordinates ( $\text{\AA} \times 10^4$ ) and Isotropic Displacement Parameters ( $\text{\AA}^2 \times 10^3$ ) for **3d**.

| Atom | x        | y       | z       | U(eq) |
|------|----------|---------|---------|-------|
| H004 | 6352.27  | 426.74  | 7221.9  | 47    |
| H005 | 10990.15 | 3428.86 | 7552.15 | 61    |
| H00A | 8499.7   | 4742.03 | 7659.87 | 62    |
| H00C | 10289.5  | 4606.04 | 6210.41 | 61    |
| H00E | 9576.99  | 2496.39 | 6297.05 | 46    |
| H00F | 9151.29  | 508.69  | 6775.93 | 51    |
| H00H | 10409.13 | 1547.7  | 8101.3  | 69    |
| H00J | 6949.88  | 6744.33 | 6495.32 | 75    |
| H00B | 5639.8   | 4769.55 | 7147.74 | 54    |
| H00D | 4685.42  | 5154.93 | 6545.29 | 54    |
| H00L | 6418.14  | 3624.66 | 8261.61 | 66    |
| H00M | 12599.92 | 4181.02 | 5653.88 | 85    |
| H00O | 7605.52  | 1658.33 | 8560.23 | 74    |

|      |          |         |         |     |
|------|----------|---------|---------|-----|
| H00P | 9811.76  | 3560.34 | 4191.59 | 104 |
| H00Q | 4822.86  | 7250.33 | 4557.77 | 117 |
| H00R | 6096.98  | 8587.55 | 6143.99 | 113 |
| H00S | 12303.73 | 3583.4  | 4632.83 | 111 |
| H00U | 5033.3   | 8775.63 | 5218.72 | 137 |
| H1A  | 6407.64  | 3554.3  | 4329.7  | 61  |
| H1B  | 5882.67  | 3589.37 | 5036.28 | 61  |
| H3A  | 6507.2   | 5647.4  | 4302.78 | 67  |
| H3B  | 4731.07  | 5214.01 | 4480.01 | 67  |
| H2A  | 7253.21  | 3493.37 | 4239.27 | 67  |
| H2B  | 7713.73  | 4856.23 | 4195.34 | 67  |
| H4A  | 5438.89  | 3929.7  | 5025.3  | 61  |
| H4B  | 4967.36  | 4561.55 | 4395.43 | 61  |

**Table S11** Atomic Occupancy for **3d**.

| <b>Atom</b> | <b><i>Occupancy</i></b> | <b>Atom</b> | <b><i>Occupancy</i></b> | <b>Atom</b> | <b><i>Occupancy</i></b> |
|-------------|-------------------------|-------------|-------------------------|-------------|-------------------------|
| C1          | 0.543(13)               | H1A         | 0.543(13)               | H1B         | 0.543(13)               |
| C3          | 0.543(13)               | H3A         | 0.543(13)               | H3B         | 0.543(13)               |
| C2          | 0.457(13)               | H2A         | 0.457(13)               | H2B         | 0.457(13)               |
| C4          | 0.457(13)               | H4A         | 0.457(13)               | H4B         | 0.457(13)               |

## Computational Studies

Computational studies were performed with the Gaussian 09 Revision A.02 program suite with the DFT method of Becke's three-parameter hybrid Hartree-Fock procedure with the Lee Yang-Parr correlation function (B3LYP). The geometry optimization and energy calculations of the reactants, intermediates, and transition state were fully optimized by the DFT/B3LYP method with LANL2DZ basis set in the solution phase using the CPCM (conductor-like Polarizable Continuum Model) model in tert-amyl alcohol solvent. Energy obtained from computation is listed in Hartree and converted to kcal/mol. The difference between the favorable and unfavorable transition states is 12.94 kcal/mol.

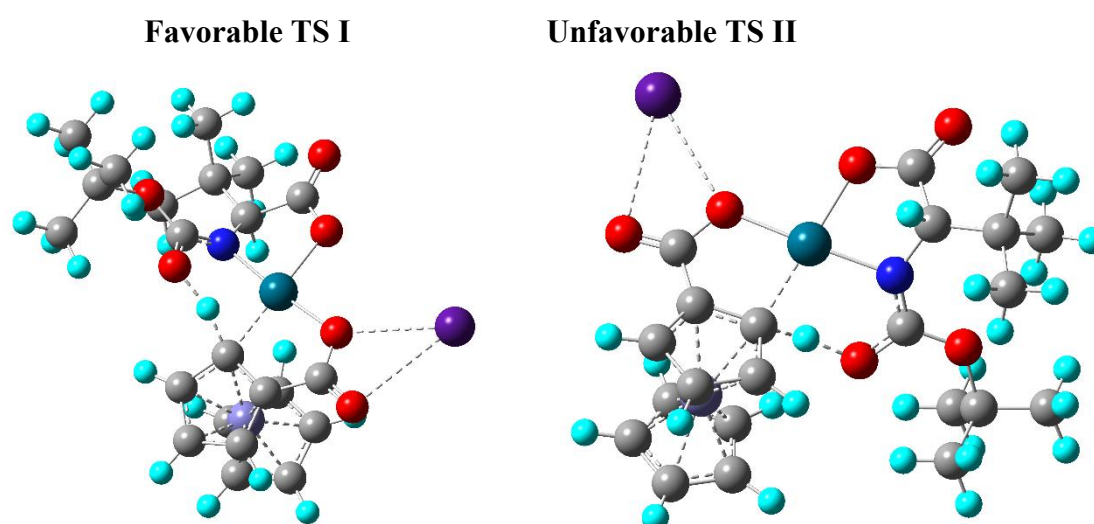

**Figure S3.** Optimized structure of favorable and unfavorable transition states

### Energy Data

| Structure | Electronic and Thermal Correction to $G_{\text{solv}}$ | $\Delta G_{\text{solv}}$ |
|-----------|--------------------------------------------------------|--------------------------|
| TS I      | -1630.857732                                           | 0.00 kcal/mol            |
| TS II     | -1630.837105                                           | +12.94 kcal/mol          |

Relative energies were calculated at the level of B3LYP/LANL2DZ/CPCM(THF) at 298K

### Co-ordinates of Optimized Structures

#### Favourable TS I

Zero-point correction 0.462680 (Hartree/Particle)

Thermal correction to Energy 0.497605

Thermal correction to Enthalpy 0.498549

Thermal correction to Gibbs Free Energy 0.392023

Sum of electronic and zero-point energies -1630.892657

Sum of electronic and thermal Energies -1630.857732

Sum of electronic and thermal Enthalpies -1630.856788

Sum of electronic and thermal Free Energies -1630.963314

Imaginary vibration frequency: 1 (associated imaginary frequency  $i1260.95\text{ cm}^{-1}$ )

Atomic Forces (Hartrees/Bohr)

| Number | X            | Y            | Z            |
|--------|--------------|--------------|--------------|
| -----  |              |              |              |
| Fe     | 0.000020277  | -0.000032994 | -0.000000830 |
| C      | 0.000005216  | 0.000001920  | 0.000001015  |
| C      | -0.000006473 | 0.000005709  | -0.000001764 |
| C      | -0.000007548 | 0.000001770  | -0.000008488 |
| C      | -0.000006536 | 0.000004470  | -0.000005002 |
| C      | -0.000000743 | 0.000002098  | -0.000002763 |
| C      | -0.000007196 | -0.000000501 | -0.000004087 |
| H      | 0.000000445  | -0.000003210 | -0.000003803 |
| H      | 0.000002039  | 0.000000020  | -0.000002670 |
| H      | 0.000001162  | -0.000000279 | -0.000002249 |
| H      | 0.000002503  | -0.000001994 | -0.000000931 |
| H      | -0.000001837 | 0.000001248  | -0.000000668 |
| H      | -0.000000658 | 0.000000541  | -0.000001223 |
| C      | -0.000007980 | -0.000005113 | -0.000004452 |
| H      | 0.000001744  | 0.000000407  | -0.000002688 |
| C      | 0.000018365  | 0.000022757  | -0.000003133 |
| C      | -0.000023529 | -0.000002472 | 0.000012183  |
| C      | -0.000012066 | -0.000001734 | -0.000011891 |
| H      | -0.000012944 | -0.000026050 | 0.000003893  |

|    |              |              |              |
|----|--------------|--------------|--------------|
| C  | -0.000001317 | -0.000001206 | 0.000001630  |
| C  | 0.000013667  | 0.000003643  | 0.000000716  |
| Pd | 0.000006617  | -0.000006054 | -0.000005593 |
| O  | 0.000000466  | 0.000013415  | -0.000000249 |
| O  | -0.000000058 | 0.000002962  | 0.000004974  |
| Cs | -0.000008230 | -0.000003578 | 0.000000642  |
| C  | -0.000000075 | 0.000011306  | 0.000012857  |
| H  | 0.000003046  | 0.000000134  | -0.000004800 |
| O  | 0.000000360  | -0.000000054 | 0.000002608  |
| O  | 0.000001055  | 0.000002600  | -0.000001493 |
| C  | -0.000000963 | 0.000000264  | 0.000000954  |
| C  | -0.000001780 | 0.000000064  | 0.000000720  |
| H  | -0.000001745 | -0.000000138 | -0.000000236 |
| H  | -0.000001966 | -0.000000078 | 0.000001034  |
| H  | -0.000001141 | -0.000000382 | 0.000000584  |
| C  | -0.000000529 | -0.000000093 | -0.000000756 |
| H  | -0.000000180 | -0.000000142 | -0.000000564 |
| H  | -0.000001188 | -0.000000343 | -0.000001523 |
| H  | -0.000001336 | -0.000000413 | -0.000001240 |
| C  | -0.000001737 | -0.000000218 | -0.000000884 |
| H  | -0.000002390 | -0.000001185 | -0.000000472 |
| H  | -0.000002231 | -0.000000785 | -0.000000175 |
| H  | -0.000002312 | -0.000000079 | -0.000000564 |
| C  | 0.000000388  | 0.000000639  | 0.000001609  |
| C  | 0.000001118  | -0.000000006 | 0.000000914  |
| H  | 0.000001569  | 0.000000129  | 0.000001117  |
| H  | 0.000001259  | 0.000000379  | 0.000000924  |
| H  | 0.000000909  | 0.000000101  | 0.000001054  |
| C  | 0.000002299  | 0.000000543  | 0.000002161  |
| H  | 0.000002524  | 0.000000378  | 0.000001975  |

|   |              |              |              |
|---|--------------|--------------|--------------|
| H | 0.000001326  | 0.000000106  | 0.000002473  |
| H | 0.000001303  | 0.000000165  | 0.000001057  |
| C | 0.000000802  | 0.000000661  | 0.000002504  |
| H | 0.000001269  | 0.000000584  | 0.000002801  |
| H | 0.000000562  | 0.000000065  | 0.000002888  |
| H | 0.000000278  | 0.000000483  | 0.000002839  |
| C | 0.000000482  | 0.000000085  | 0.000003077  |
| H | 0.000000390  | 0.000000256  | 0.000001395  |
| N | -0.000006441 | 0.000002551  | 0.000002855  |
| O | 0.000024774  | 0.000011052  | 0.000000360  |
| O | 0.000004917  | -0.000004408 | -0.000000623 |

### Unfavorable TS II

Zero-point correction 0.462721 (Hartree/Particle)

Thermal correction to Energy 0.497534

Thermal correction to Enthalpy 0.498478

Thermal correction to Gibbs Free Energy 0.392986

Sum of electronic and zero-point energies -1630.871918

Sum of electronic and thermal Energies -1630.837105

Sum of electronic and thermal Enthalpies -1630.836161

Sum of electronic and thermal Free Energies -1630.941653

Imaginary vibration frequency: 1 (associated imaginary frequency  $i1236.41\text{ cm}^{-1}$ )

| Atomic | Forces (Hartrees/Bohr) |              |              |
|--------|------------------------|--------------|--------------|
| Number | X                      | Y            | Z            |
| -----  |                        |              |              |
| Fe     | 0.000029699            | -0.000015200 | 0.000018878  |
| C      | 0.000011904            | 0.000014730  | 0.000018015  |
| C      | -0.000023525           | 0.000008034  | -0.000008719 |
| C      | -0.000004891           | -0.000012274 | -0.000017858 |
| C      | -0.000022952           | 0.000002262  | -0.000023363 |
| C      | -0.000018377           | 0.000020984  | -0.000005954 |



|    |              |              |              |
|----|--------------|--------------|--------------|
| C  | -0.000001878 | 0.000004062  | 0.000015667  |
| H  | -0.000002027 | 0.000004190  | 0.000000723  |
| H  | 0.000000056  | -0.000001432 | -0.000000692 |
| H  | -0.000000118 | 0.000003649  | 0.000002428  |
| H  | -0.000003664 | 0.000002256  | 0.000002207  |
| H  | -0.000003284 | 0.000000777  | 0.000001773  |
| H  | -0.000004937 | 0.000001977  | 0.000000407  |
| C  | 0.000009903  | -0.000016233 | 0.000017160  |
| H  | -0.000003852 | -0.000000051 | 0.000000983  |
| C  | -0.000015146 | 0.000015004  | -0.000008533 |
| C  | -0.000005526 | 0.000000382  | 0.000004074  |
| C  | 0.000027530  | 0.000002482  | 0.000001574  |
| H  | -0.000018118 | -0.000001730 | -0.000000678 |
| C  | -0.000000586 | -0.000001773 | -0.000001656 |
| C  | -0.000016340 | 0.000005943  | 0.000012450  |
| Pd | -0.000011625 | -0.000011445 | -0.000015853 |
| O  | -0.000011616 | -0.000001062 | 0.000009764  |
| O  | 0.000000642  | -0.000005148 | -0.000001276 |
| Cs | -0.000009755 | 0.000001473  | 0.000008221  |
| C  | 0.000001098  | 0.000009499  | 0.000020874  |
| H  | -0.000002781 | -0.000000661 | -0.000005198 |
| O  | 0.000001516  | -0.000003128 | 0.000006434  |
| O  | -0.000007232 | -0.000000399 | -0.000005198 |
| C  | 0.000003038  | -0.000001292 | -0.000003301 |
| C  | 0.000001983  | 0.000002013  | -0.000002995 |
| H  | 0.000002219  | 0.000004182  | -0.000004592 |
| H  | 0.000003476  | 0.000001494  | -0.000001905 |
| H  | 0.000003771  | 0.000000386  | -0.000004310 |
| C  | -0.000000335 | 0.000003648  | -0.000005549 |
| H  | 0.000005559  | 0.000002137  | -0.000003556 |

|   |              |              |              |
|---|--------------|--------------|--------------|
| H | 0.000003327  | 0.000003237  | -0.000002301 |
| H | 0.000002843  | 0.000004992  | -0.000003059 |
| C | -0.000000726 | 0.000002054  | -0.000000123 |
| H | -0.000003436 | 0.000008438  | -0.000003217 |
| H | -0.000000190 | 0.000004554  | -0.000000131 |
| H | 0.000000777  | 0.000004400  | -0.000002860 |
| C | 0.000003004  | -0.000004224 | -0.000001108 |
| C | 0.000003050  | -0.000002956 | -0.000003343 |
| H | 0.000005158  | -0.000003400 | -0.000003504 |
| H | 0.000003006  | -0.000004453 | -0.000001311 |
| H | 0.000002752  | 0.000000946  | -0.000000659 |
| C | 0.000003385  | -0.000005961 | 0.000000978  |
| H | 0.000004536  | -0.000005492 | 0.000000770  |
| H | 0.000001698  | -0.000006608 | -0.000000281 |
| H | 0.000002616  | -0.000004649 | -0.000000139 |
| C | 0.000001620  | -0.000000736 | -0.000001244 |
| H | 0.000002729  | -0.000002018 | -0.000001750 |
| H | 0.000002560  | -0.000002087 | 0.000000010  |
| H | 0.000001490  | -0.000001607 | 0.000000074  |
| C | 0.000001631  | -0.000005846 | 0.000002532  |
| N | 0.000035628  | -0.000002589 | -0.000011195 |
| O | 0.000011702  | -0.000009040 | 0.000006759  |
| O | -0.000002552 | -0.000002046 | 0.000004832  |
| H | -0.000000433 | -0.000004645 | -0.000000177 |

# NMR Spectra of Chiral Ferrocene Fused Isochroman Derivatives 3a-3v and Post-derivatized Compound 4

## <sup>1</sup>H NMR Spectrum of 3a

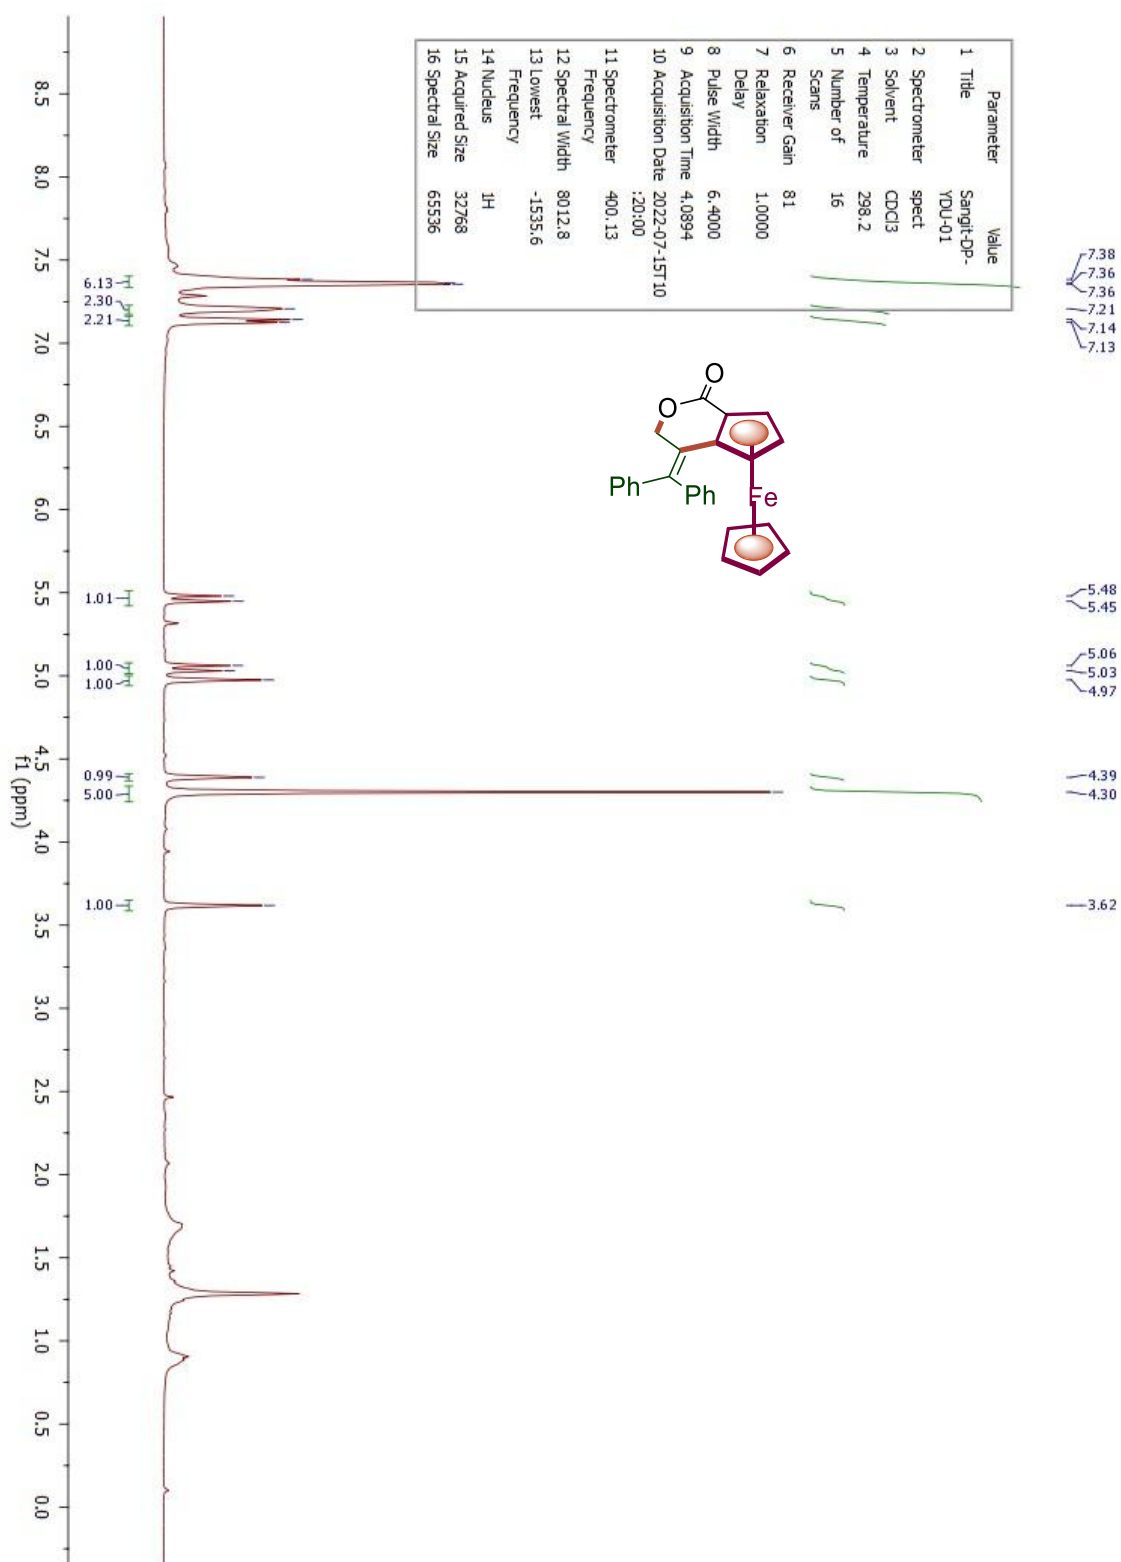

# $^{13}\text{C}\{^1\text{H}\}$ NMR Spectrum of **3a**

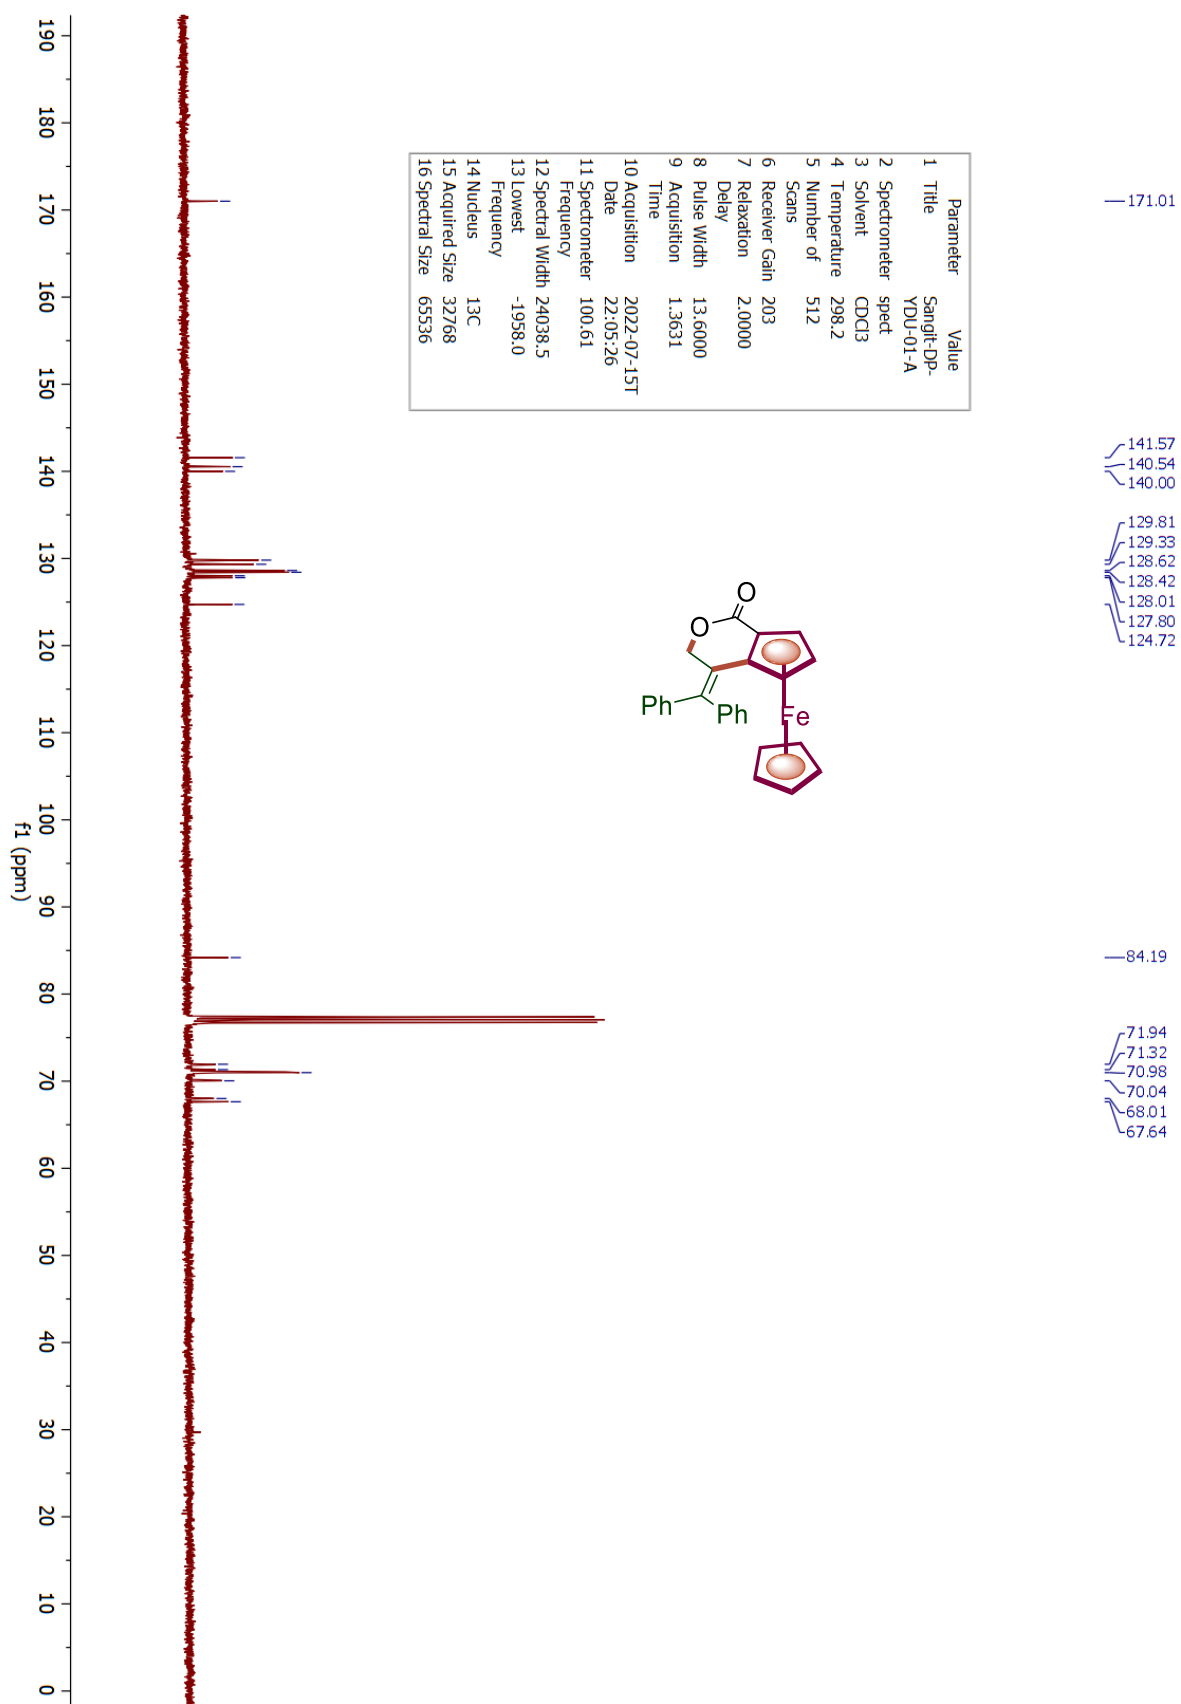

# <sup>1</sup>H NMR Spectrum of 3b

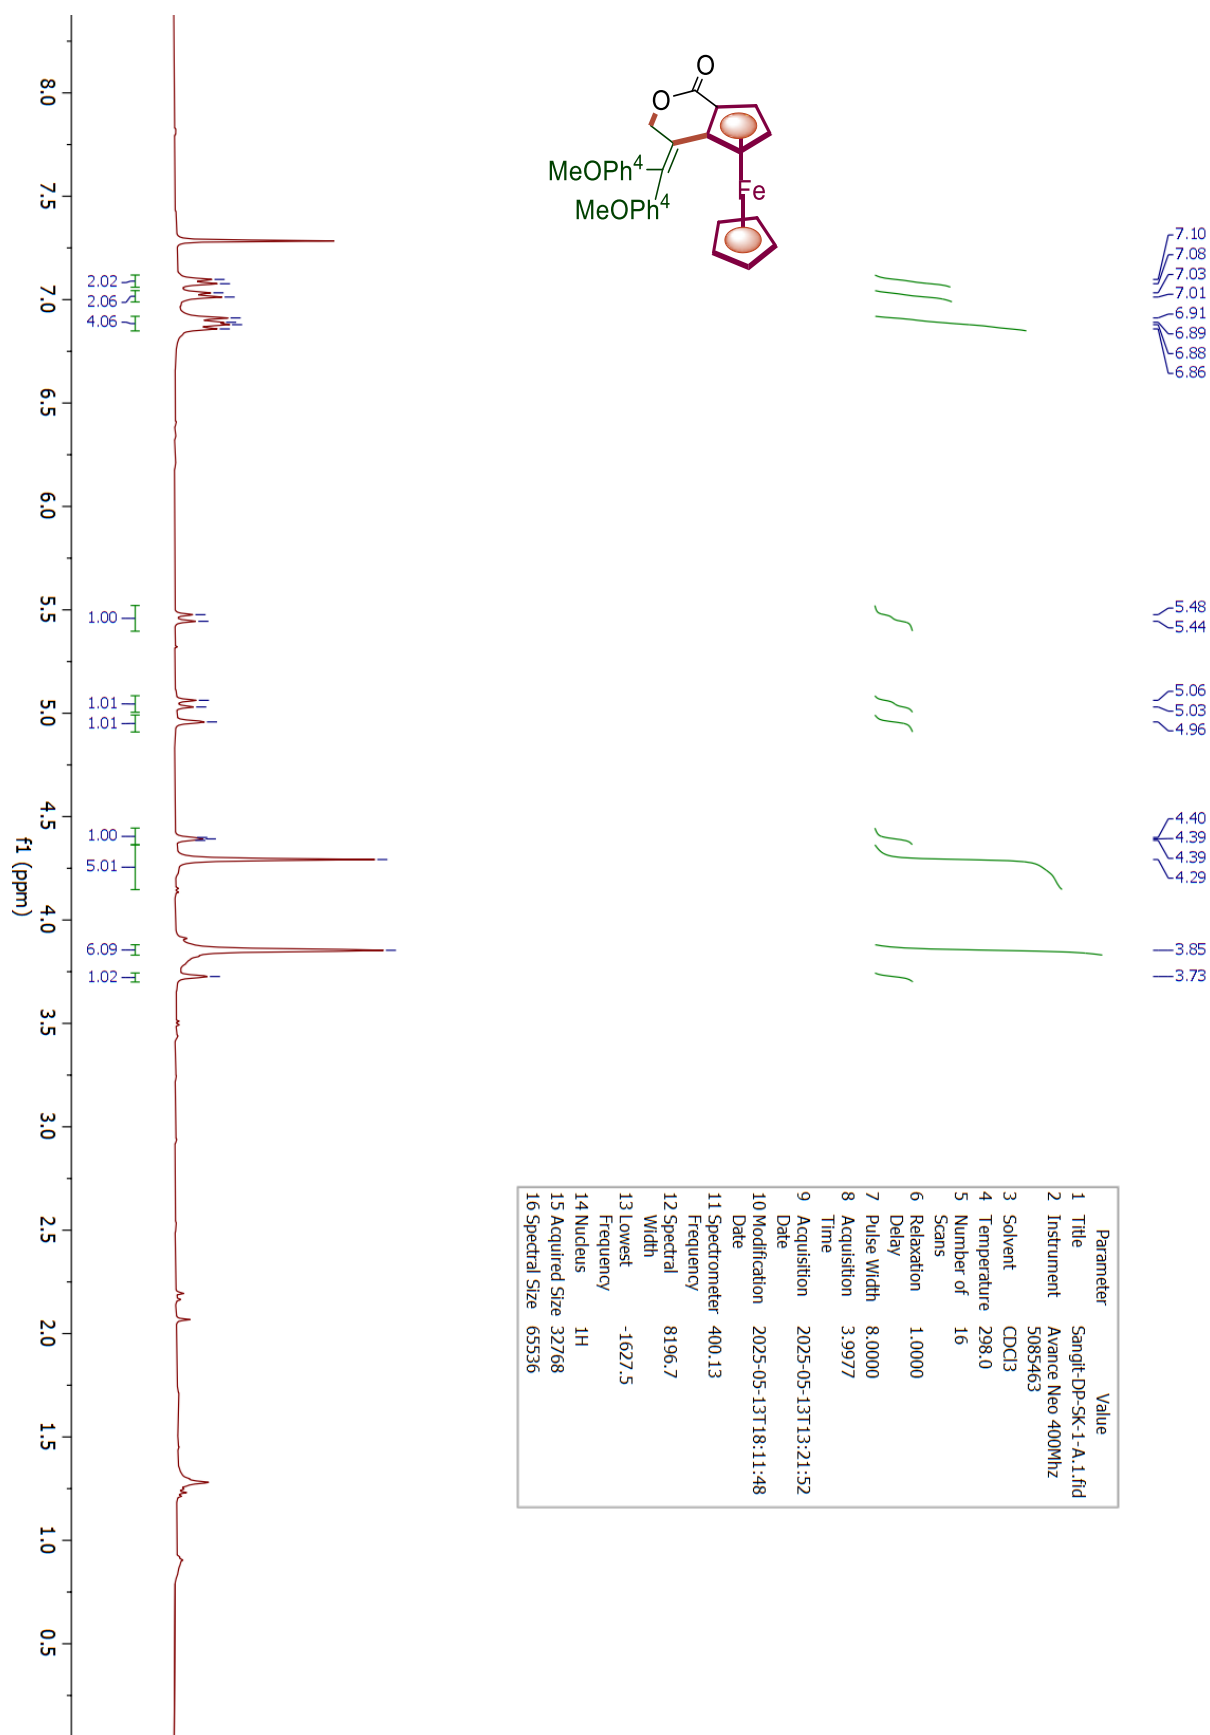

# $^{13}\text{C}\{^1\text{H}\}$ NMR Spectrum of 3b

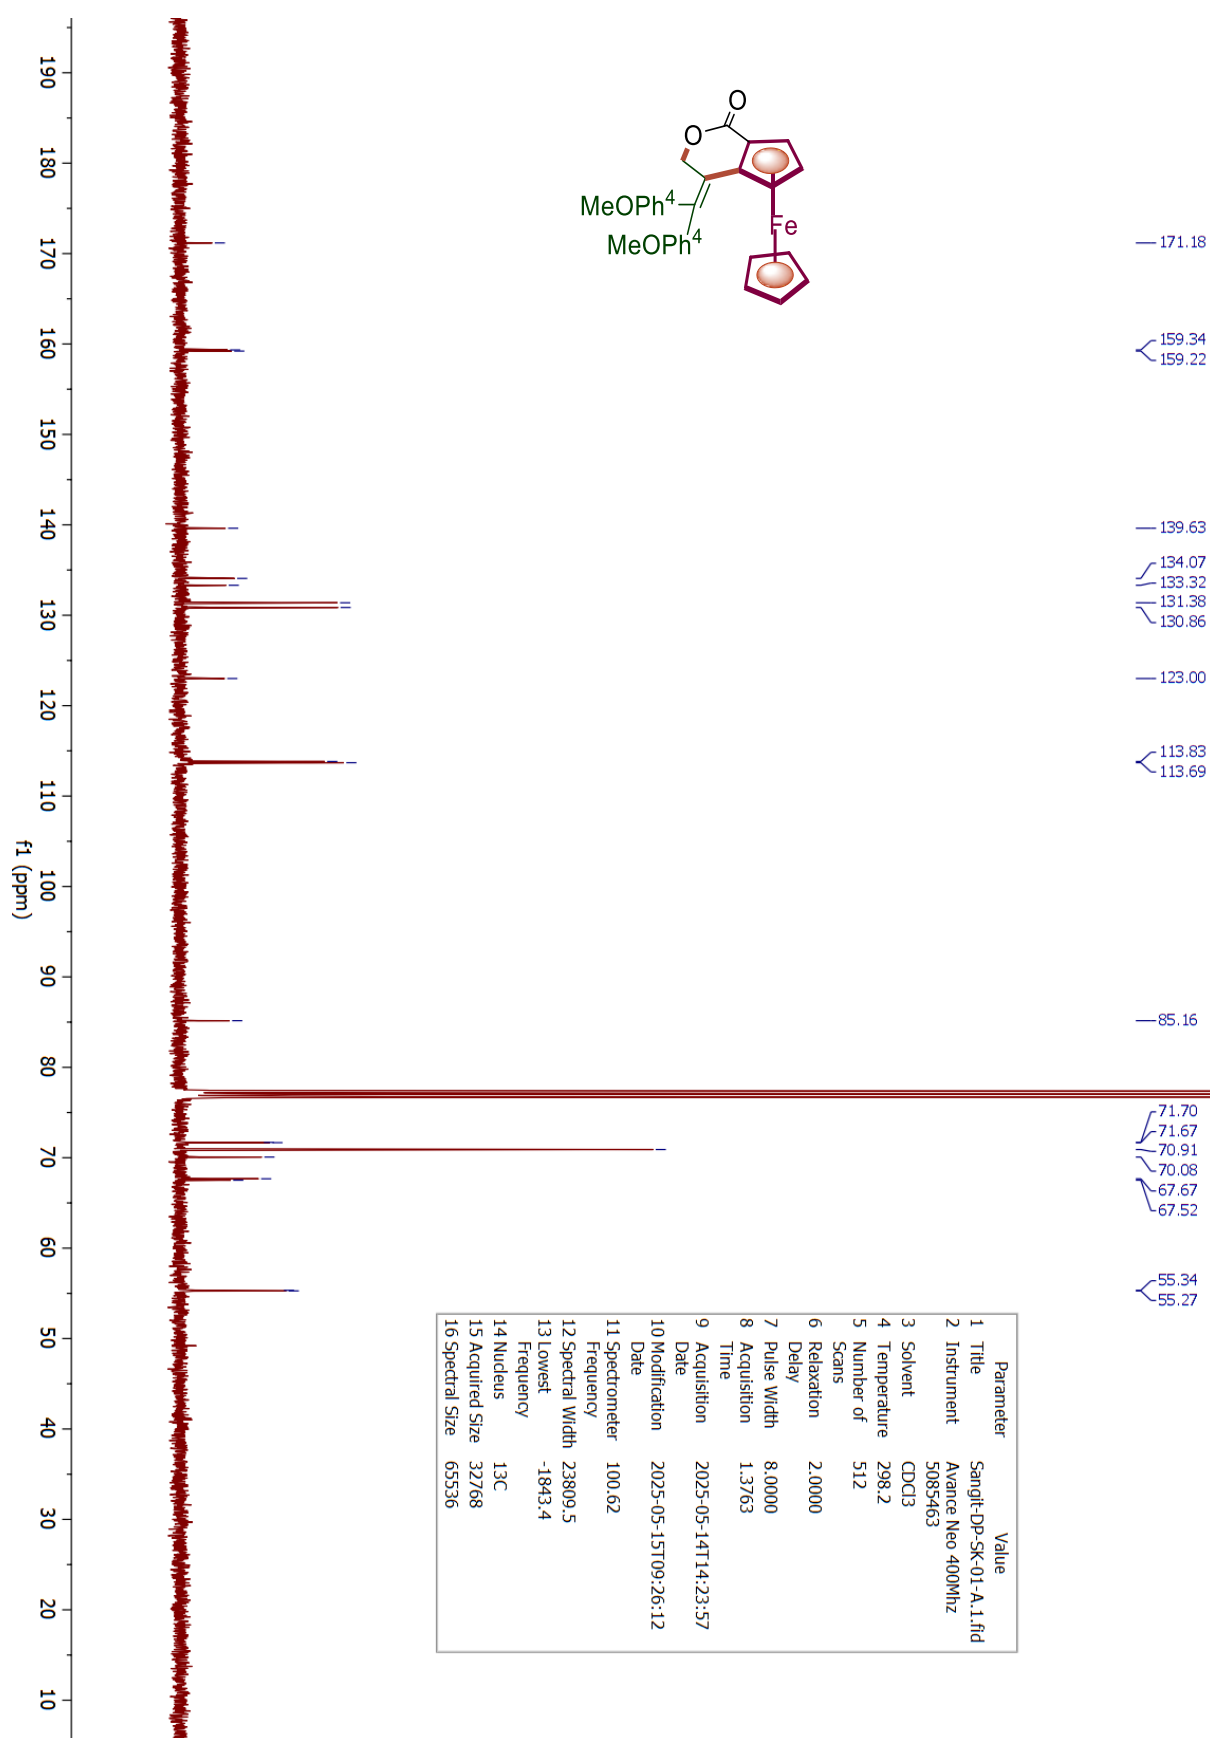

# <sup>1</sup>H NMR Spectrum of 3c

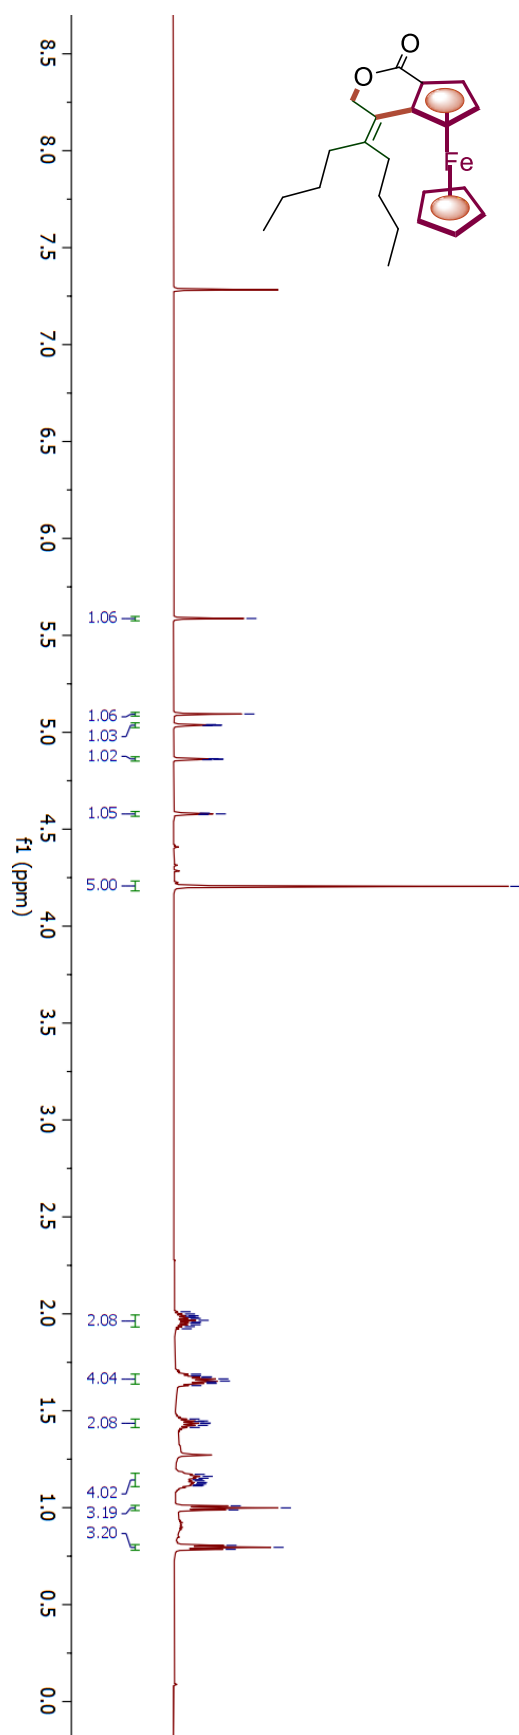

| Parameter            | Value                            |
|----------------------|----------------------------------|
| 1 Title              | Sangit-DP-YDU-01-A(700MHz).1.fid |
| 2 Instrument         | spect                            |
| 3 Solvent            | CDCl3                            |
| 4 Temperature        | 298.0                            |
| 5 Number of Scans    | 32                               |
| 6 Relaxation Delay   | 1.0000                           |
| 7 Pulse Width        | 8.1000                           |
| 8 Acquisition Time   | 2.3243                           |
| 9 Acquisition Date   | 2025-03-25T11:09:58              |
| 10 Modification Date | 2025-03-27T20:48:41              |
| 11 Spectrometer      | 700.13                           |
| 12 Spectral Width    | 14097.7                          |
| 13 Lowest Frequency  | -2725.6                          |
| 14 Nucleus           | <sup>1</sup> H                   |
| 15 Acquired Size     | 32768                            |
| 16 Spectral Size     | 131072                           |

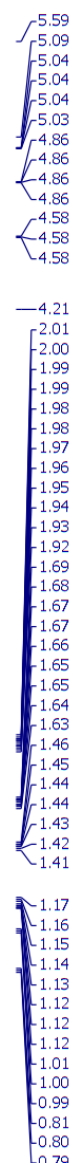

# $^{13}\text{C}\{^1\text{H}\}$ NMR Spectrum of 3c

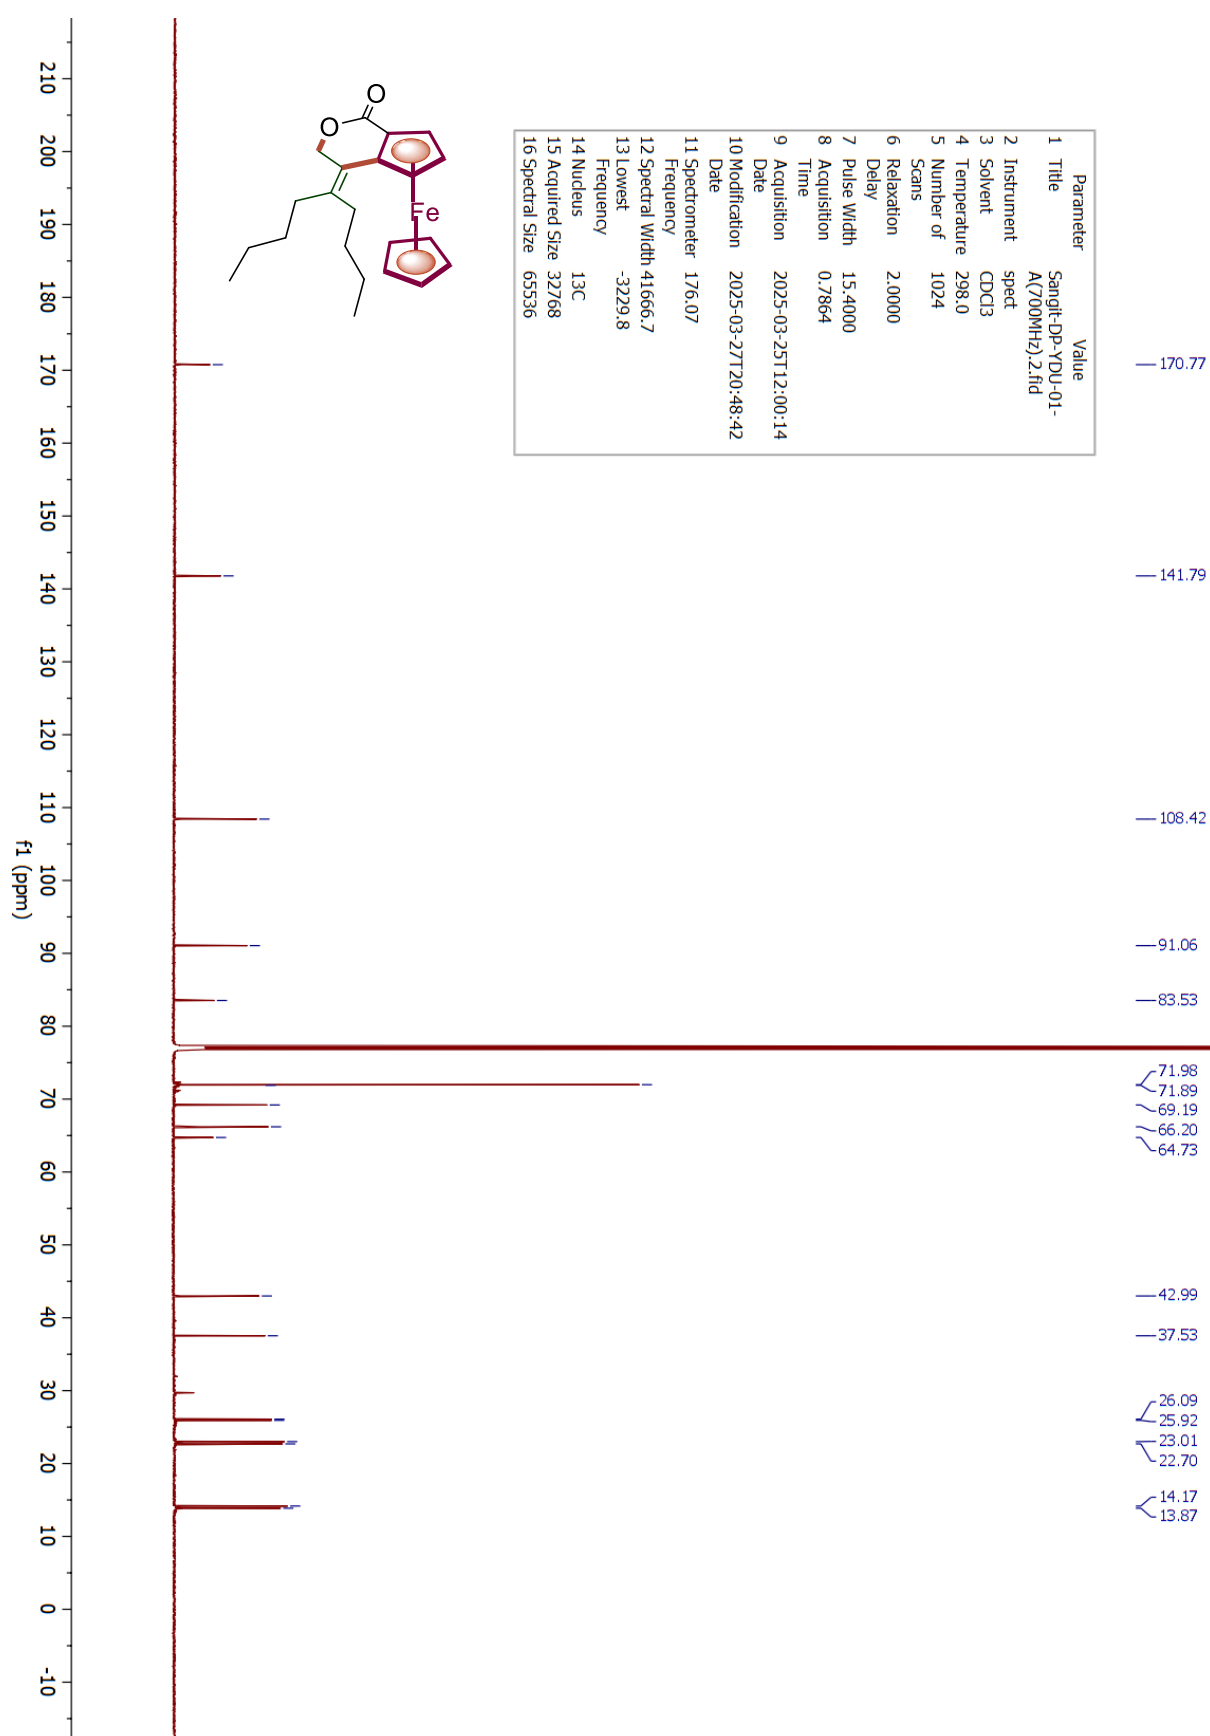



# <sup>1</sup>H NMR Spectrum of 3d

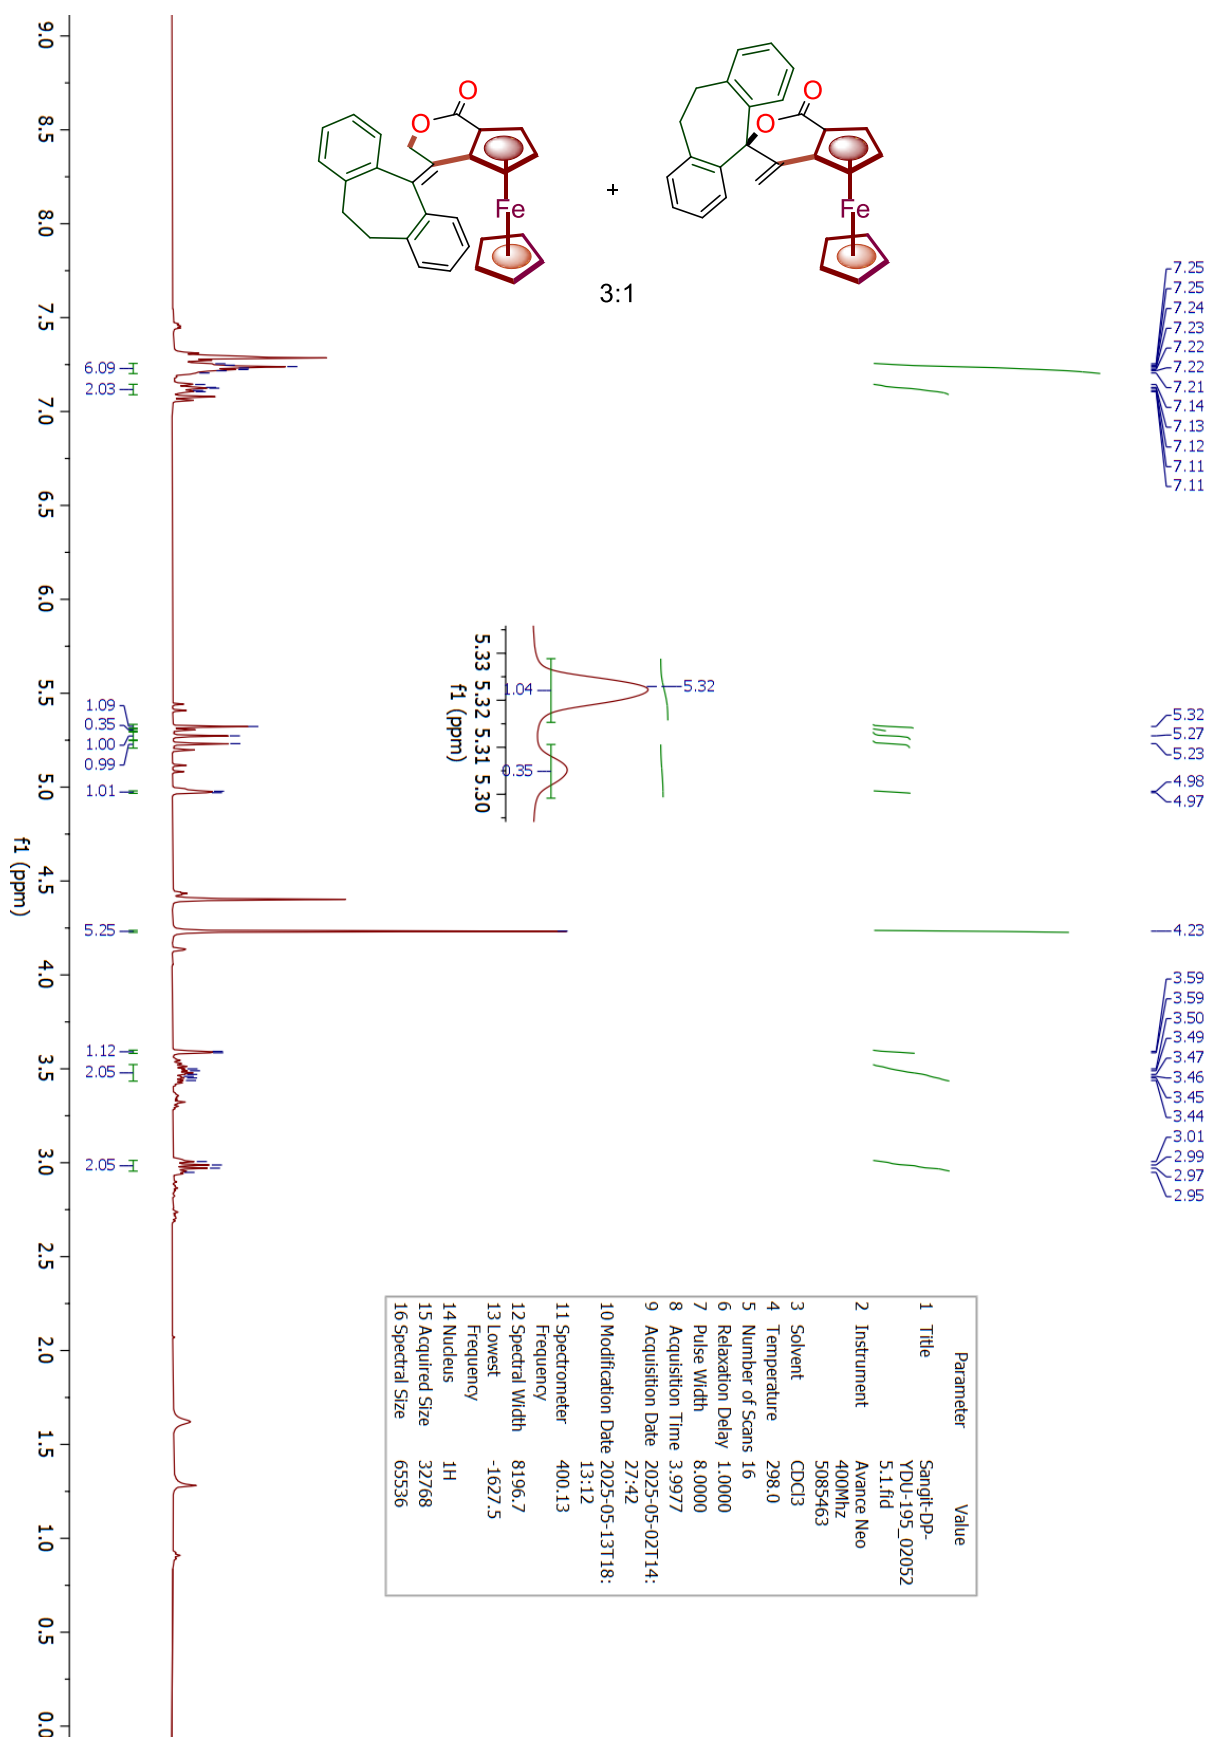

A mixture of regio-isomers were observed as 3:1 in the NMR spectra

# $^{13}\text{C}\{^1\text{H}\}$ NMR Spectrum of 3d

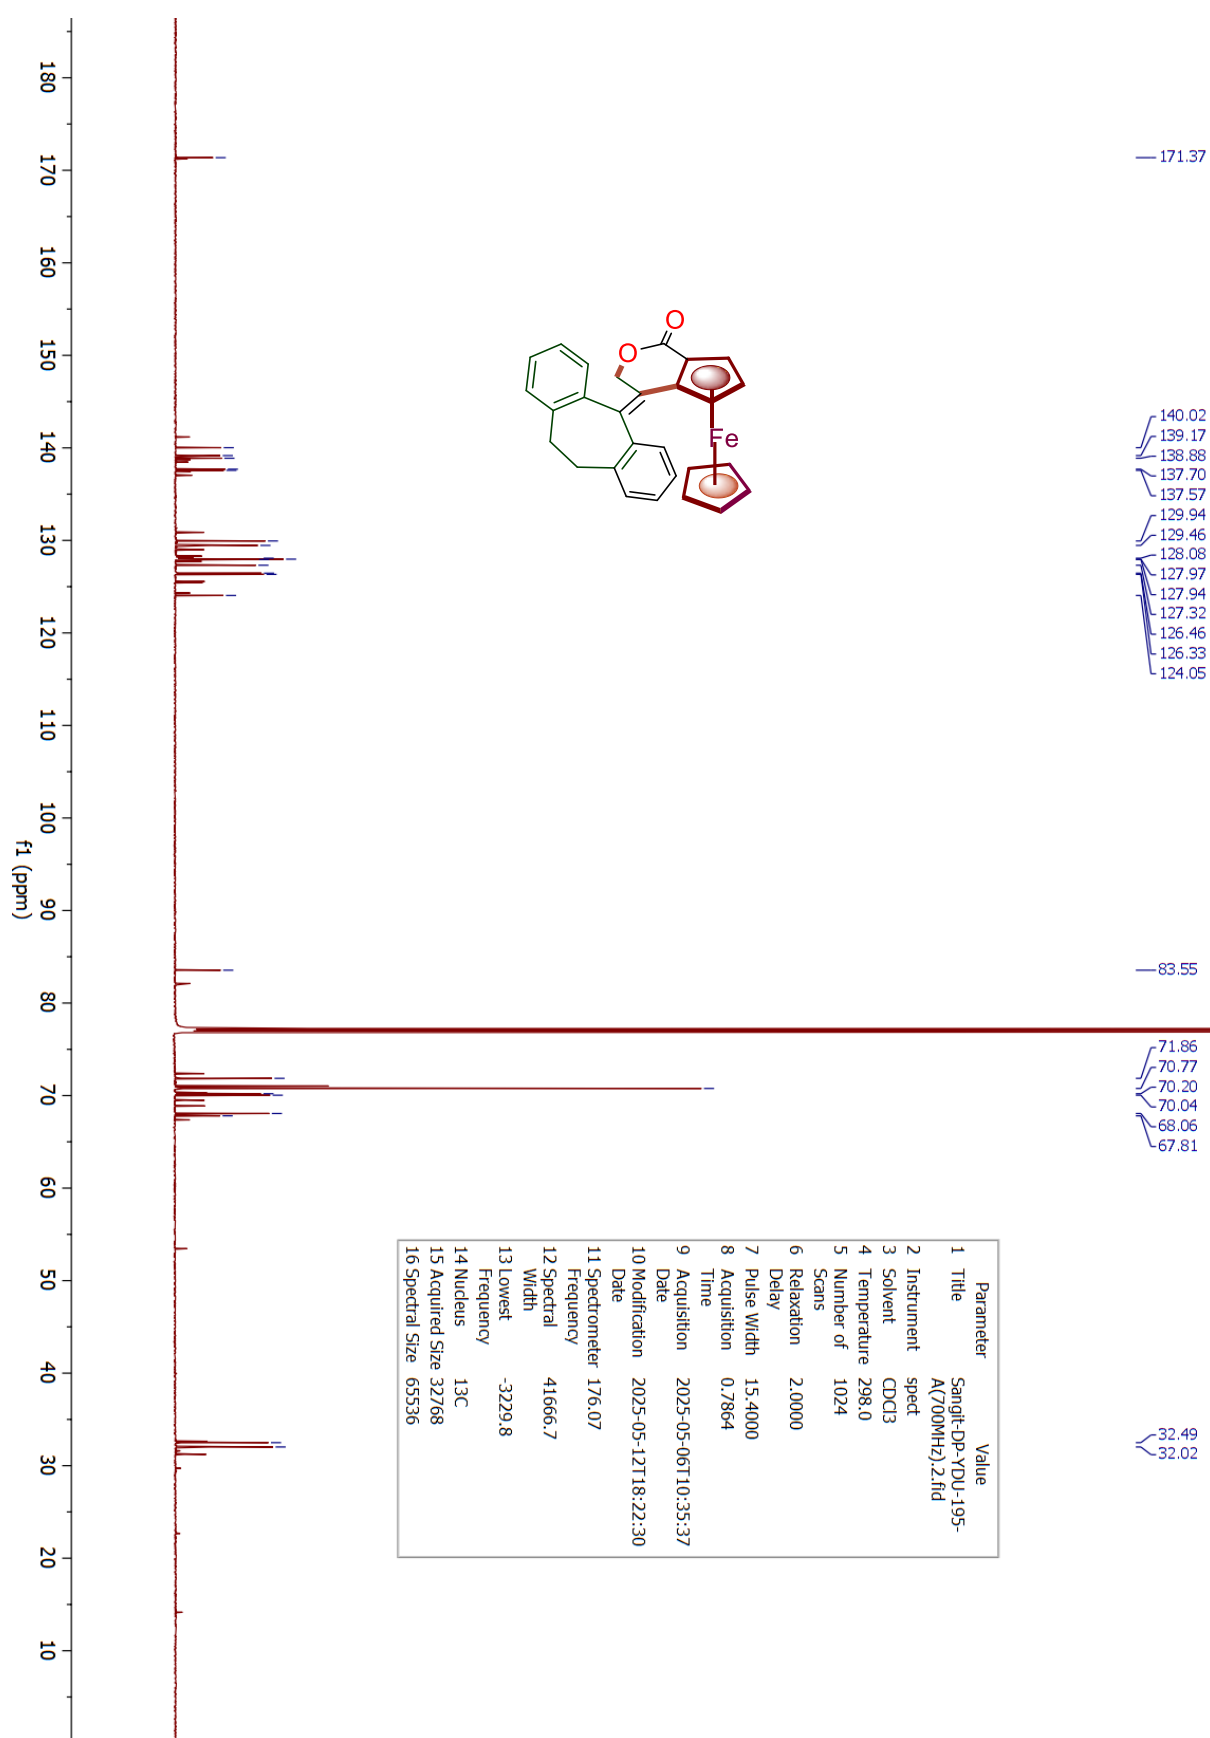

# <sup>1</sup>H NMR Spectrum of 3e

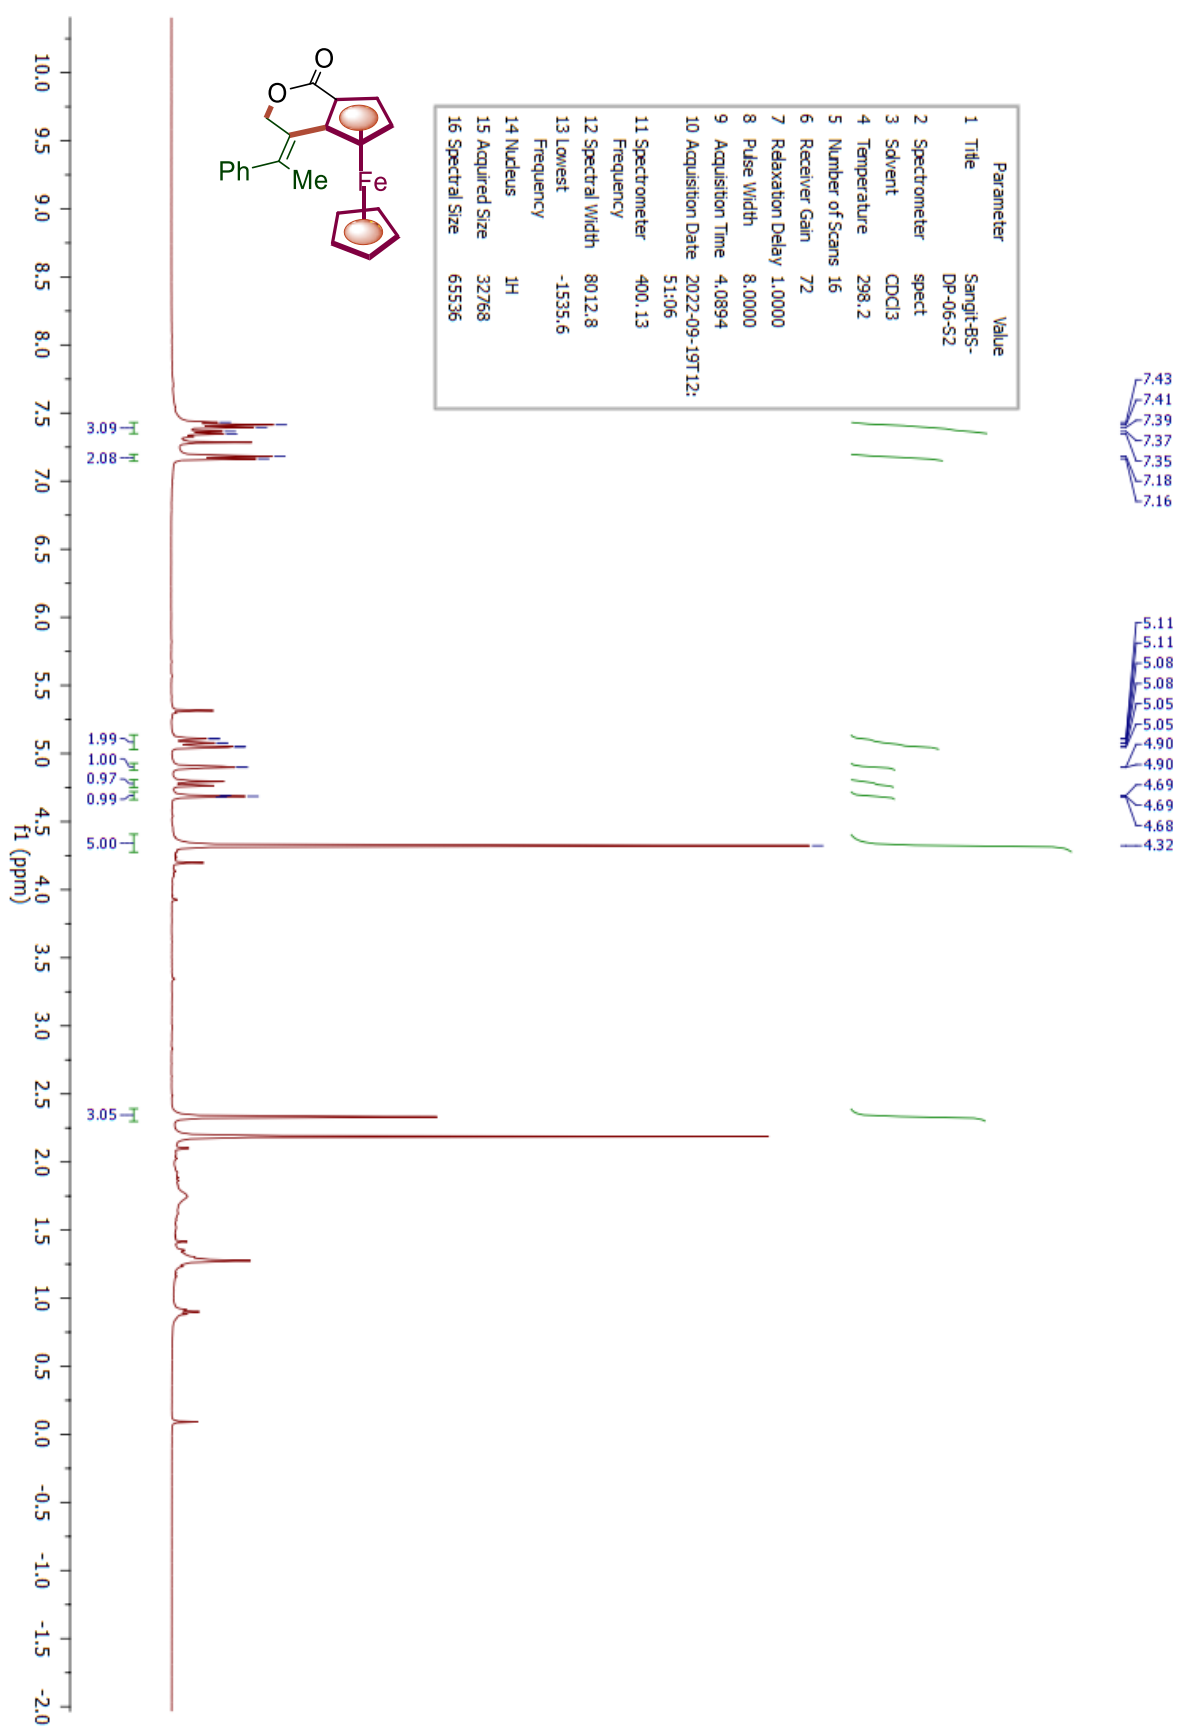

# $^{13}\text{C}\{^1\text{H}\}$ NMR Spectrum of 3e

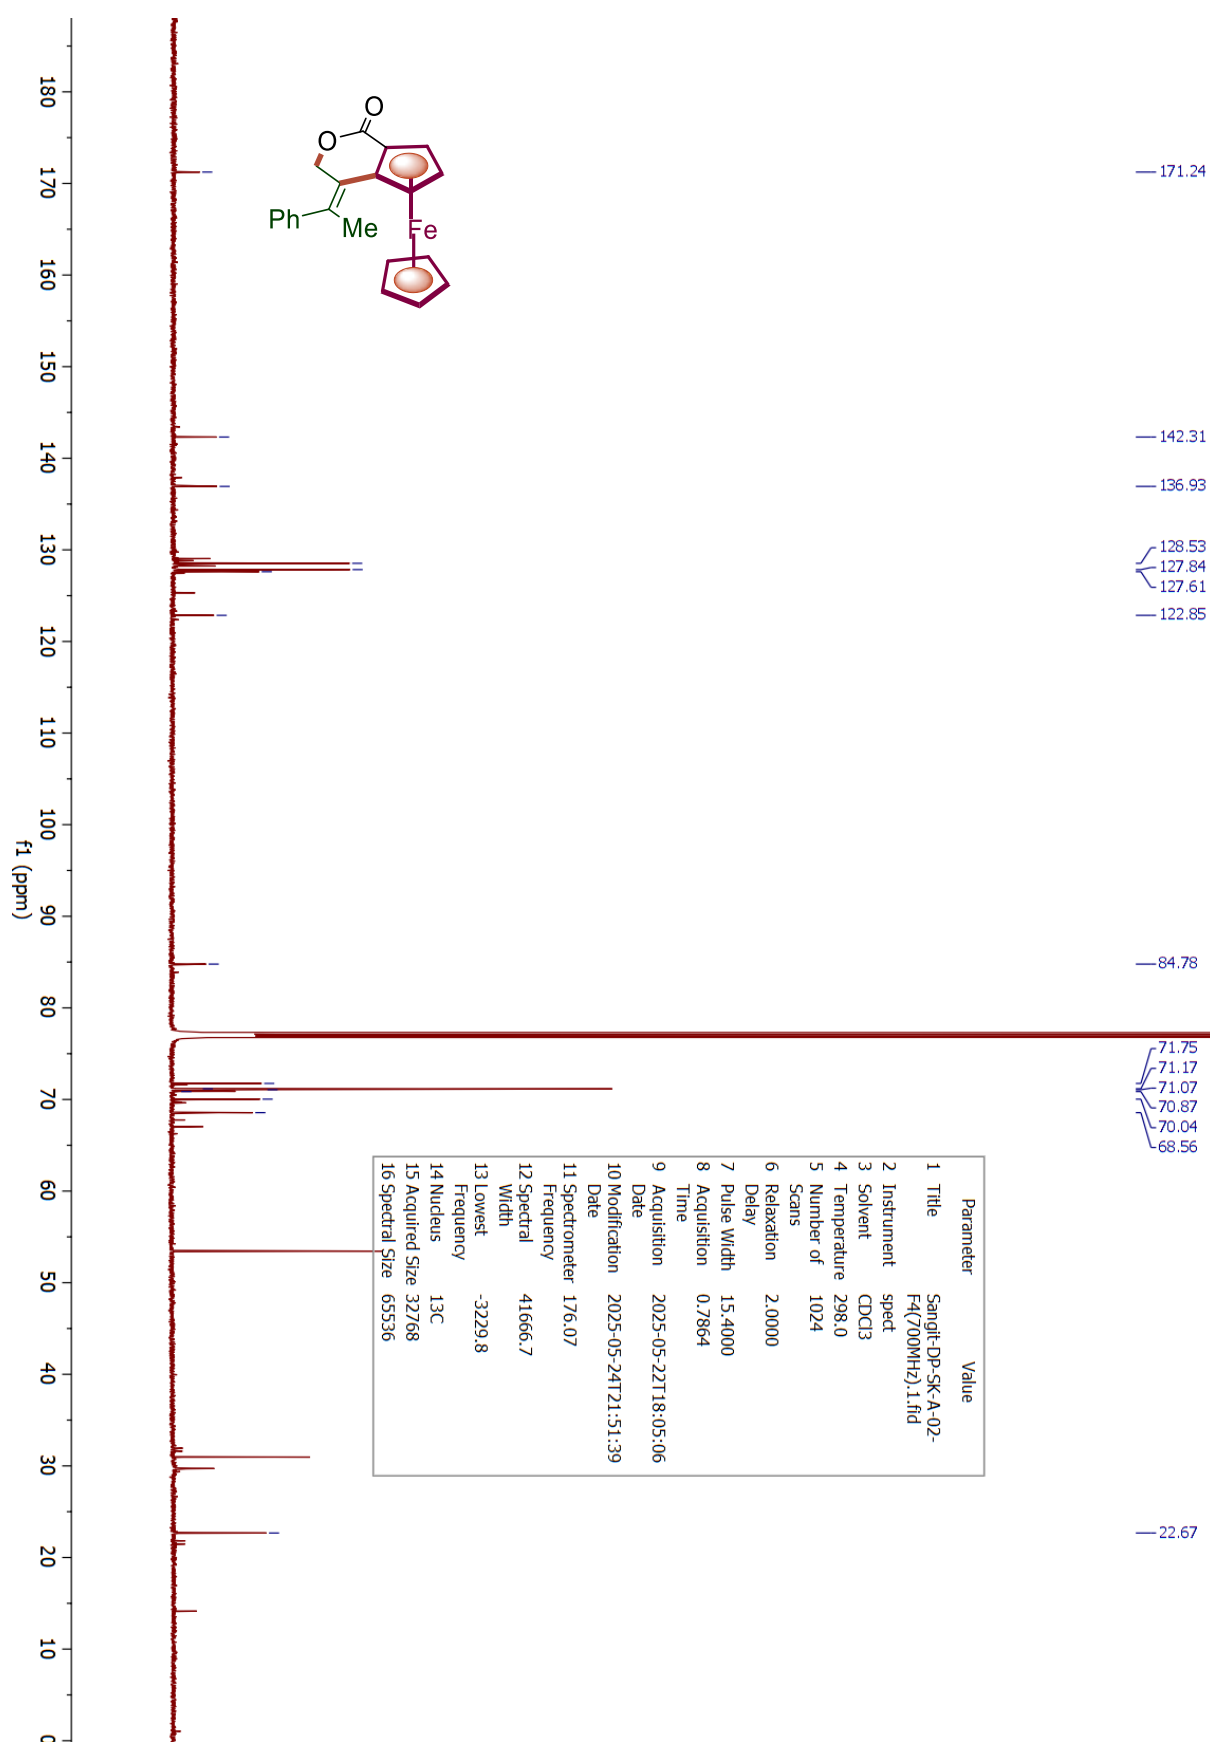

# <sup>1</sup>H NMR Spectrum of 3f

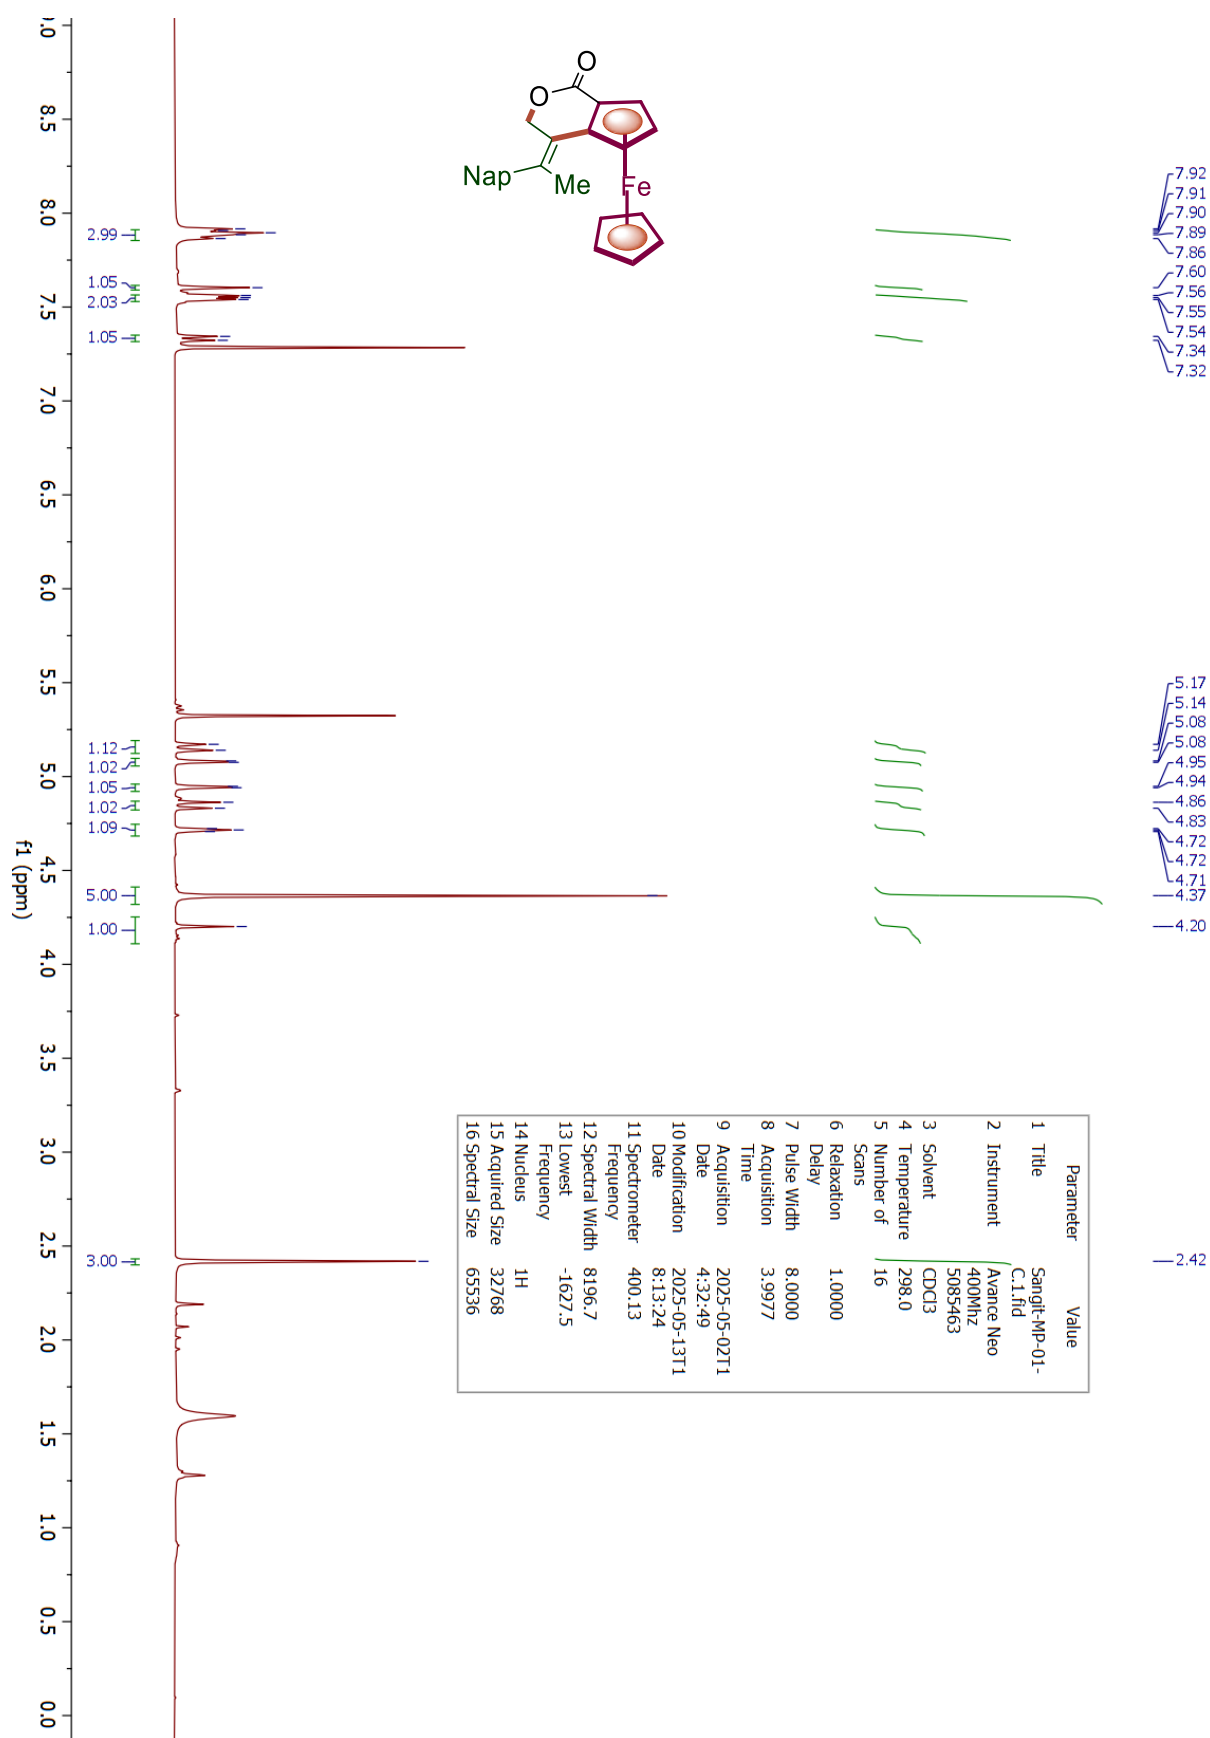

# $^{13}\text{C}\{^1\text{H}\}$ NMR Spectrum of 3f

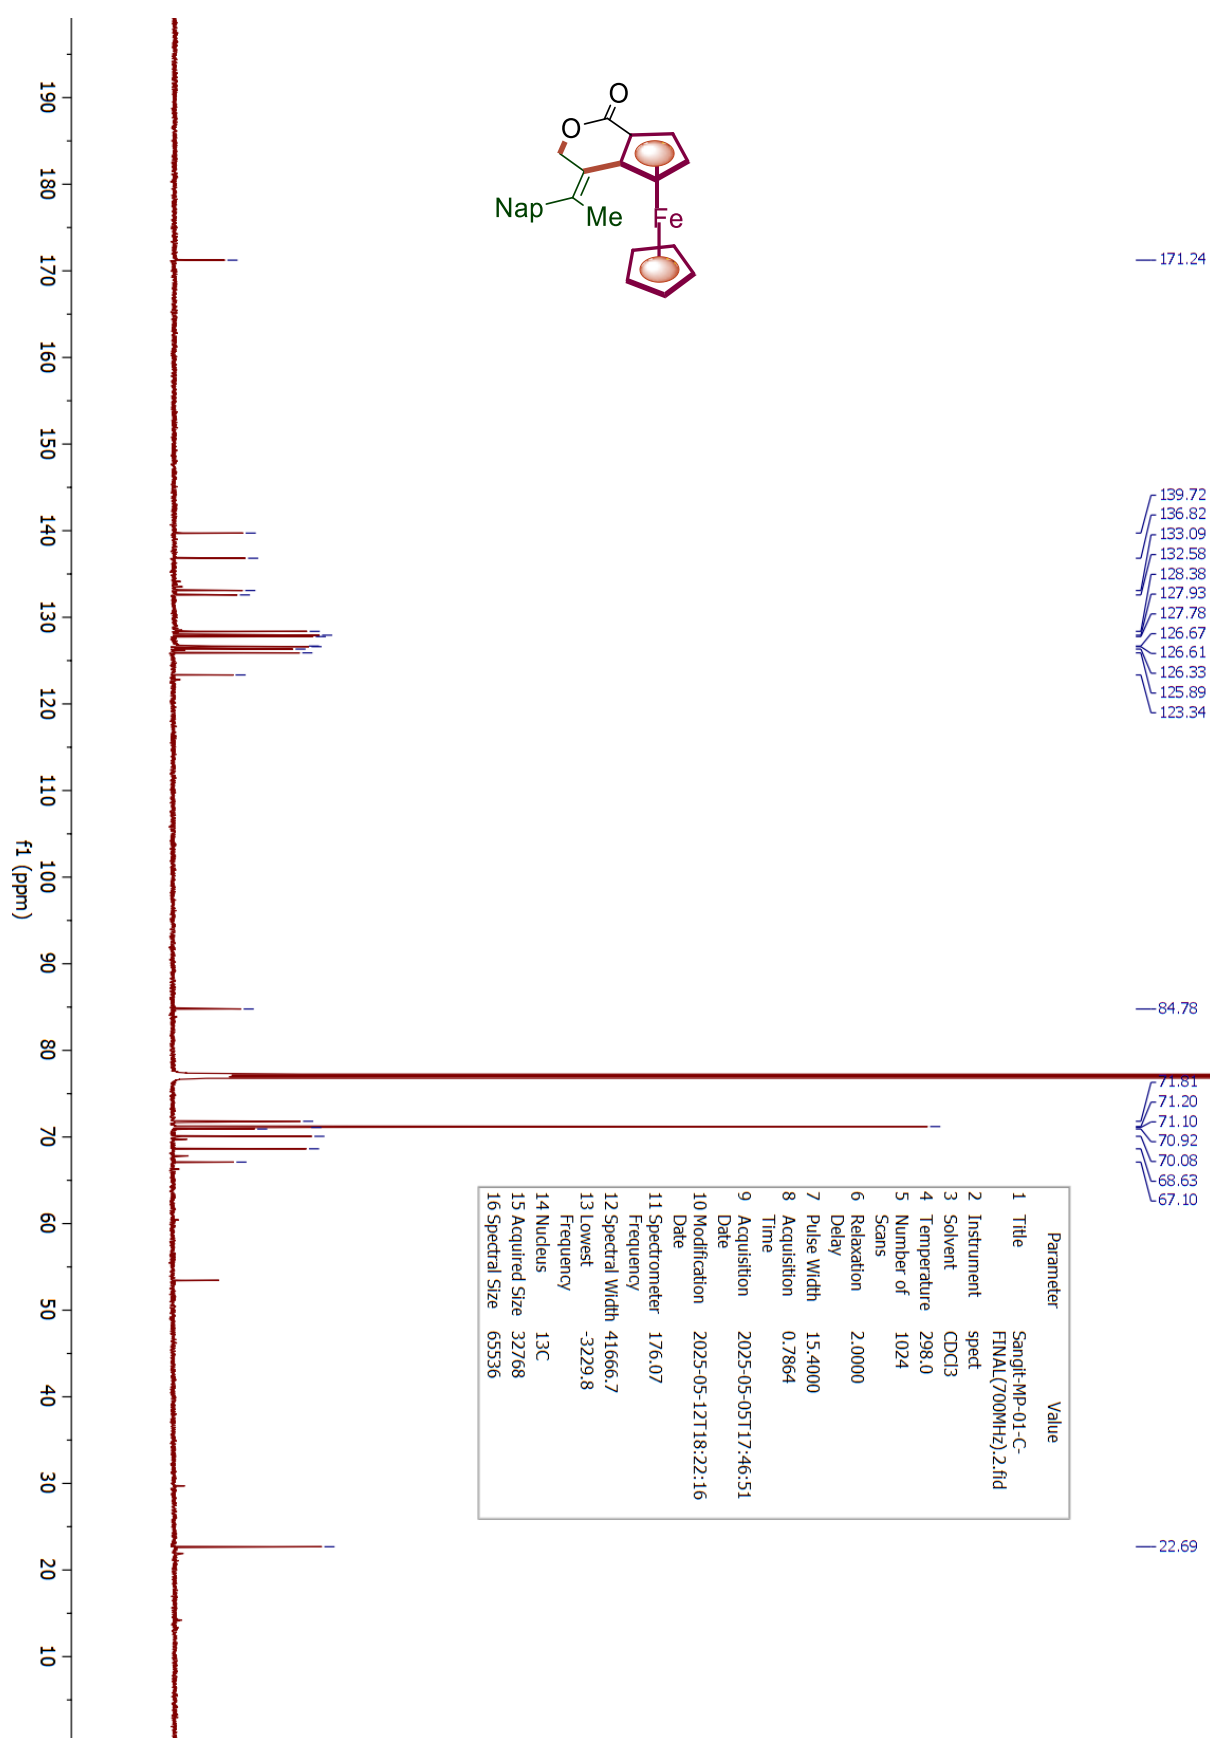

# <sup>1</sup>H NMR Spectrum of 3g

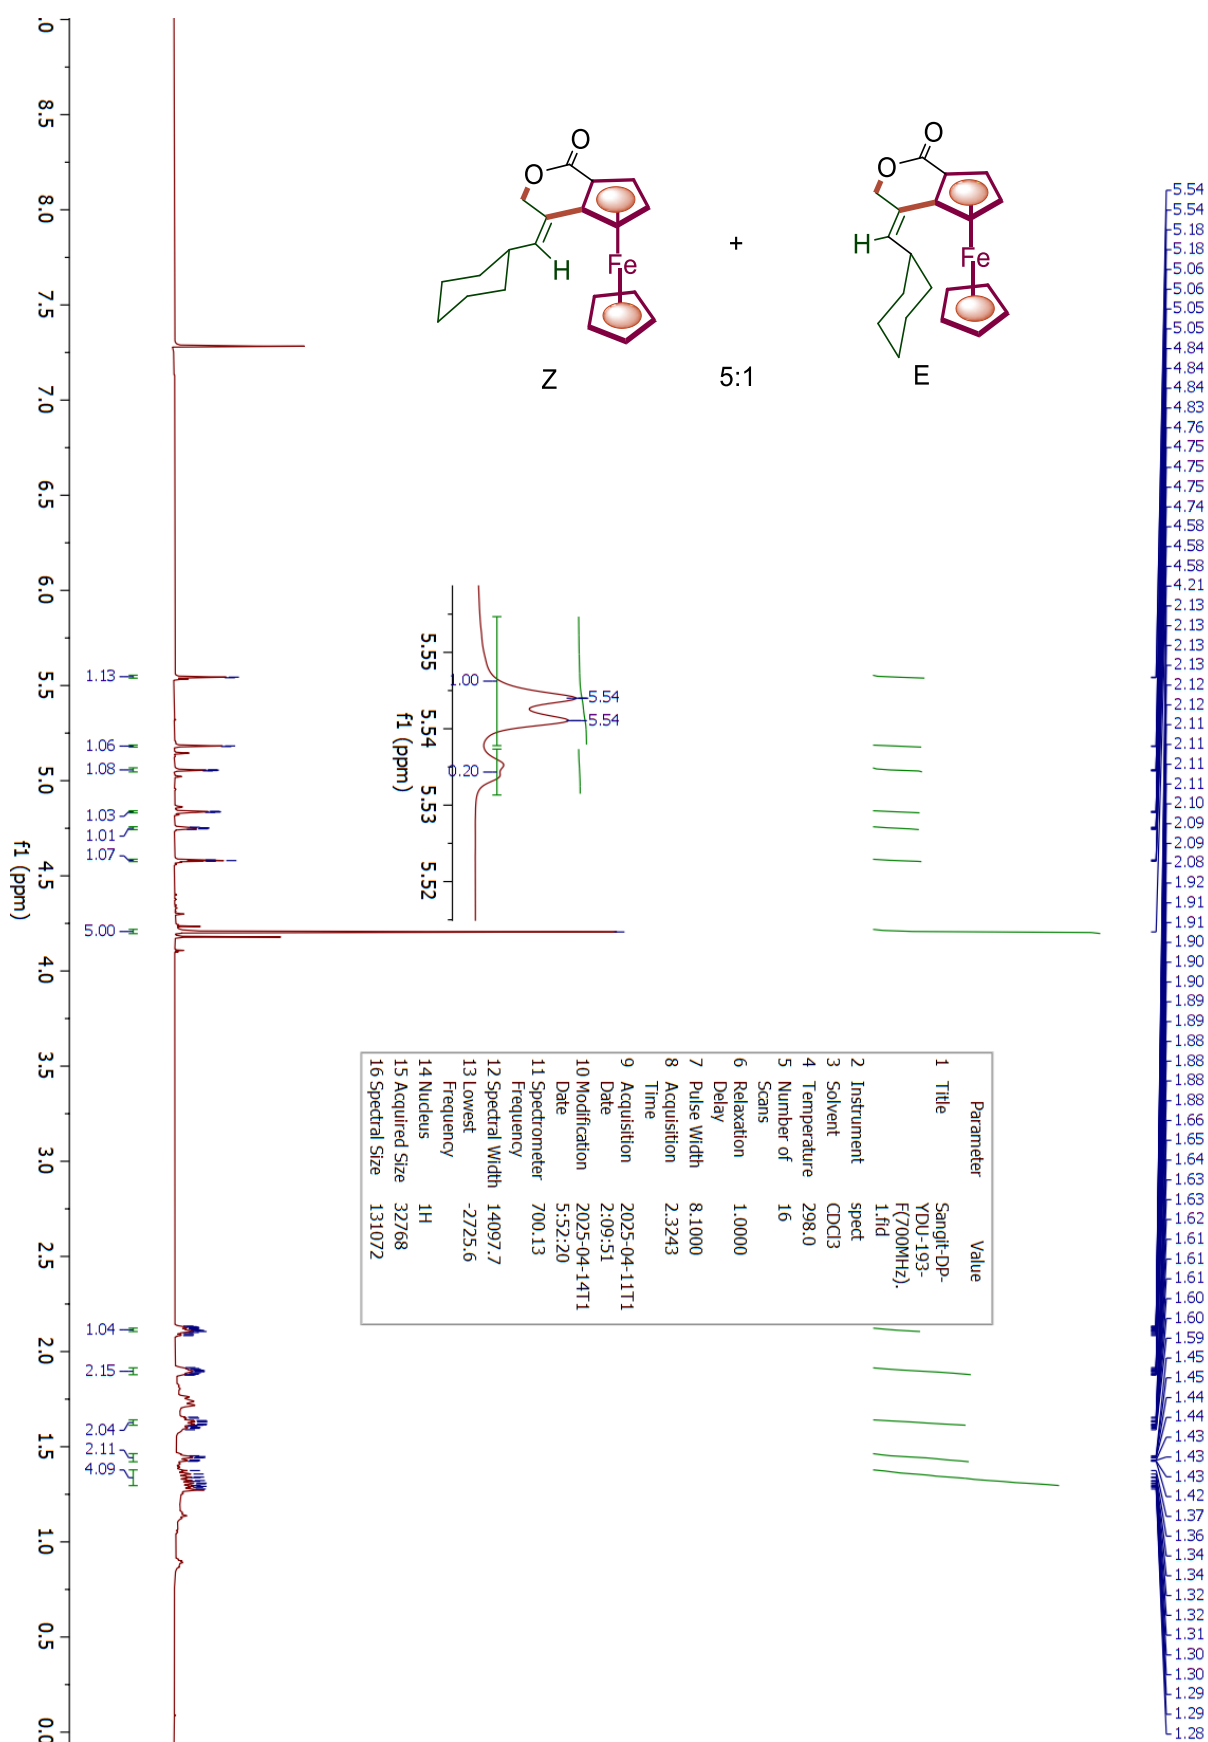

A mixture of E:Z regio-isomer were observed as 5:1 in the NMR spectra

# $^{13}\text{C}\{^1\text{H}\}$ NMR Spectrum of 3g

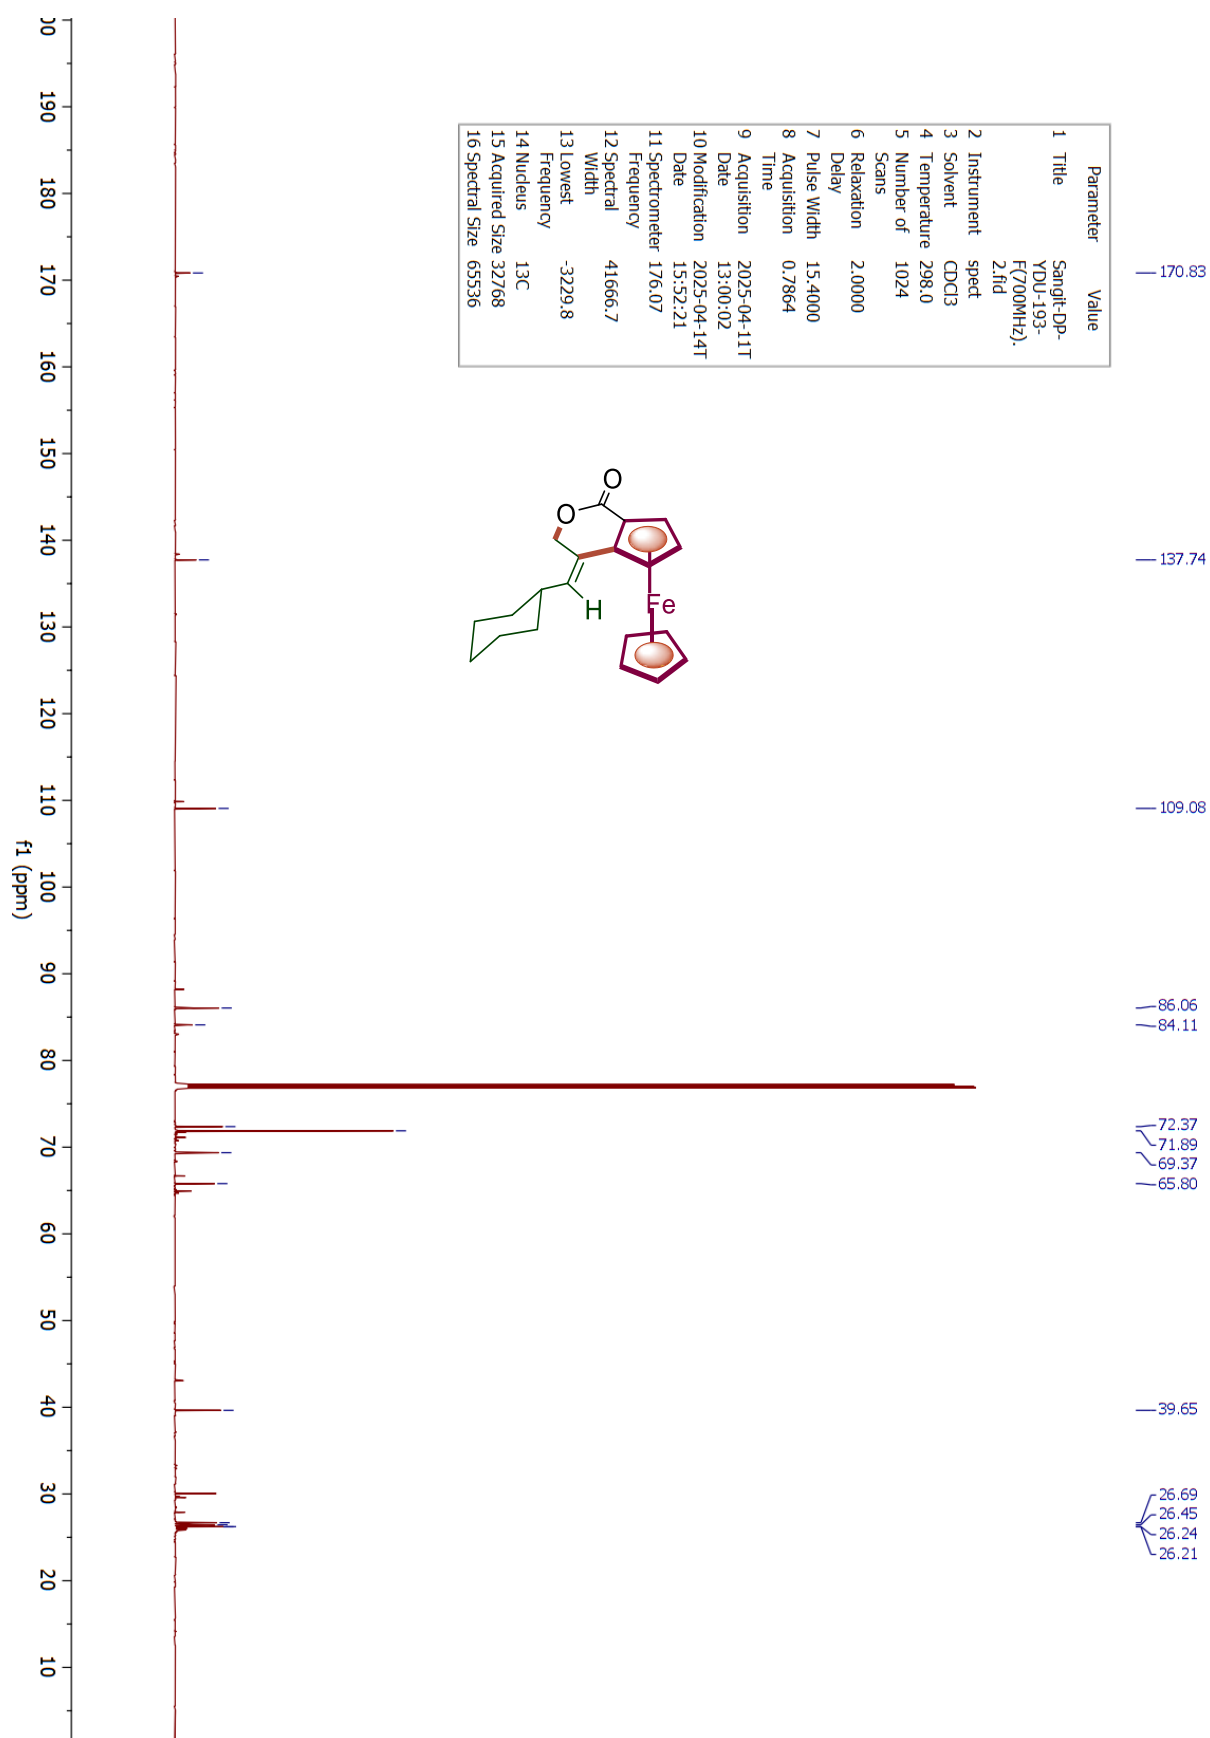



# <sup>1</sup>H NMR Spectrum of 3h

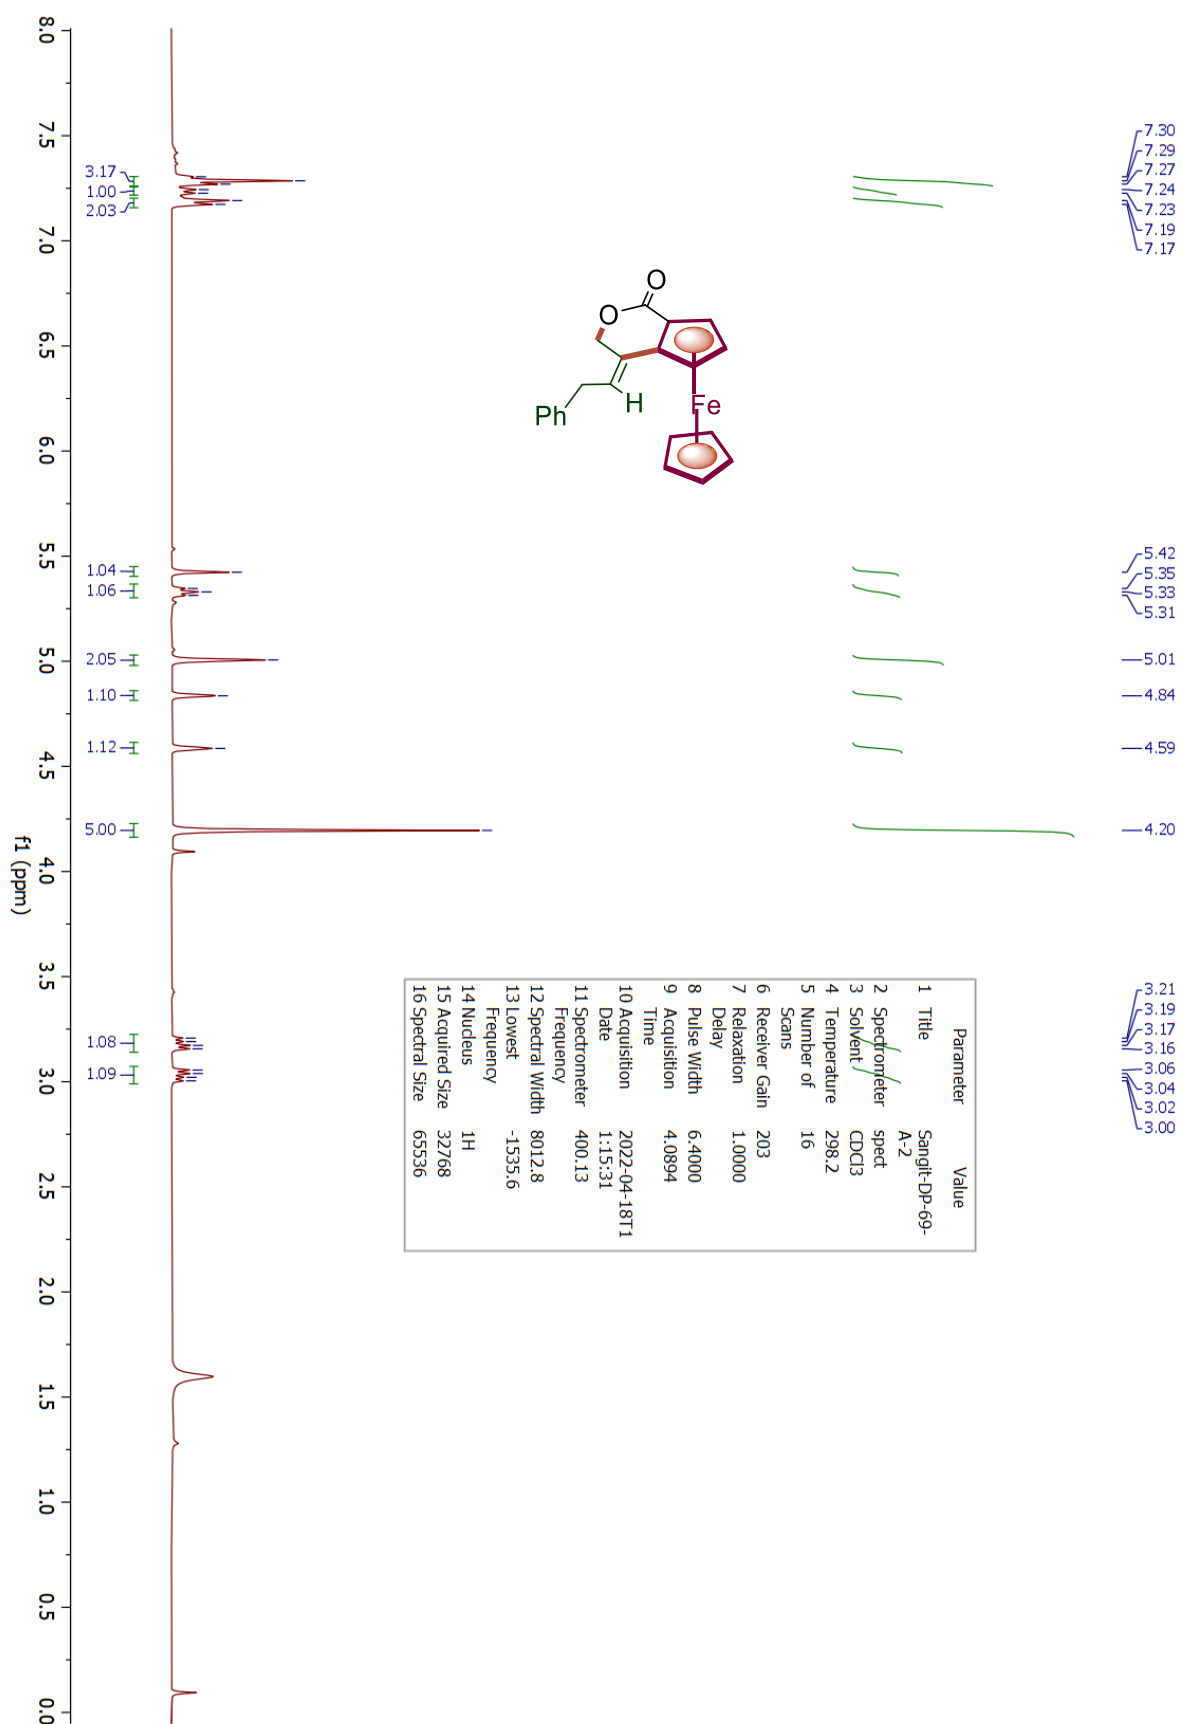

# $^{13}\text{C}\{^1\text{H}\}$ NMR Spectrum of 3h

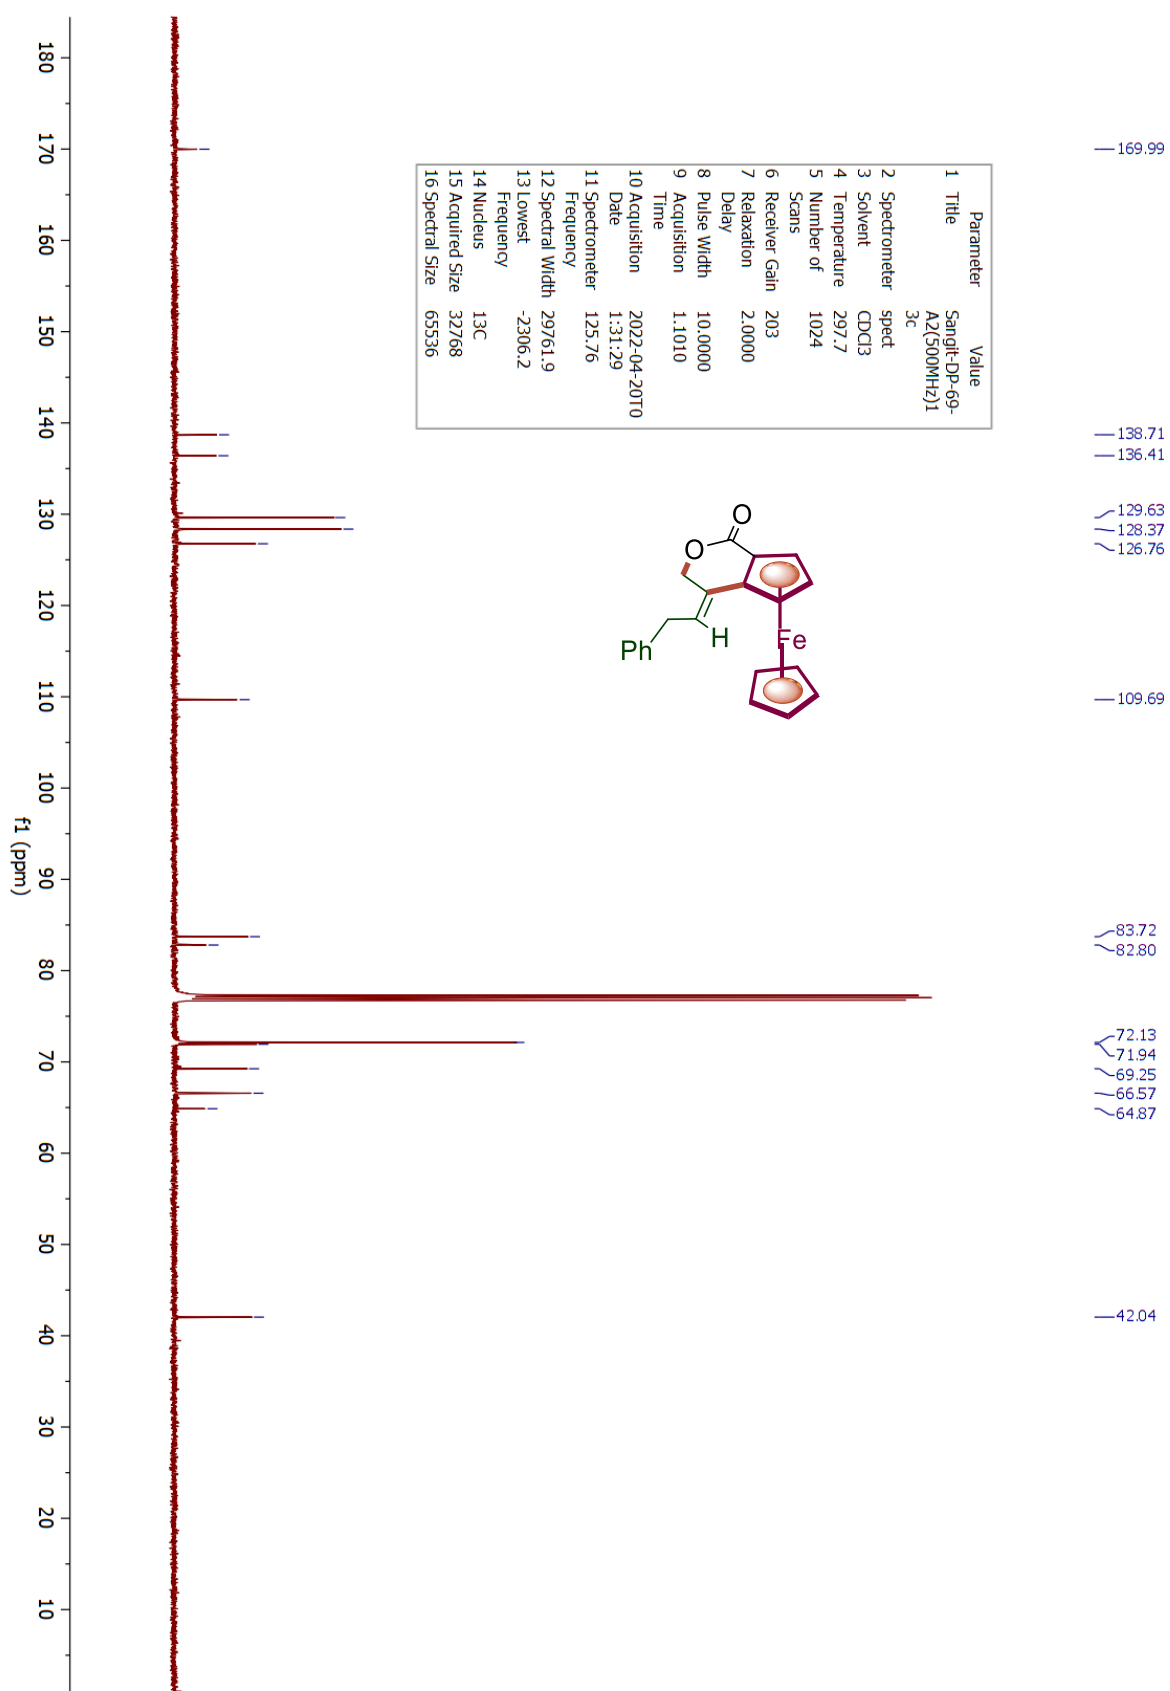

# <sup>1</sup>H NMR Spectrum of 3i

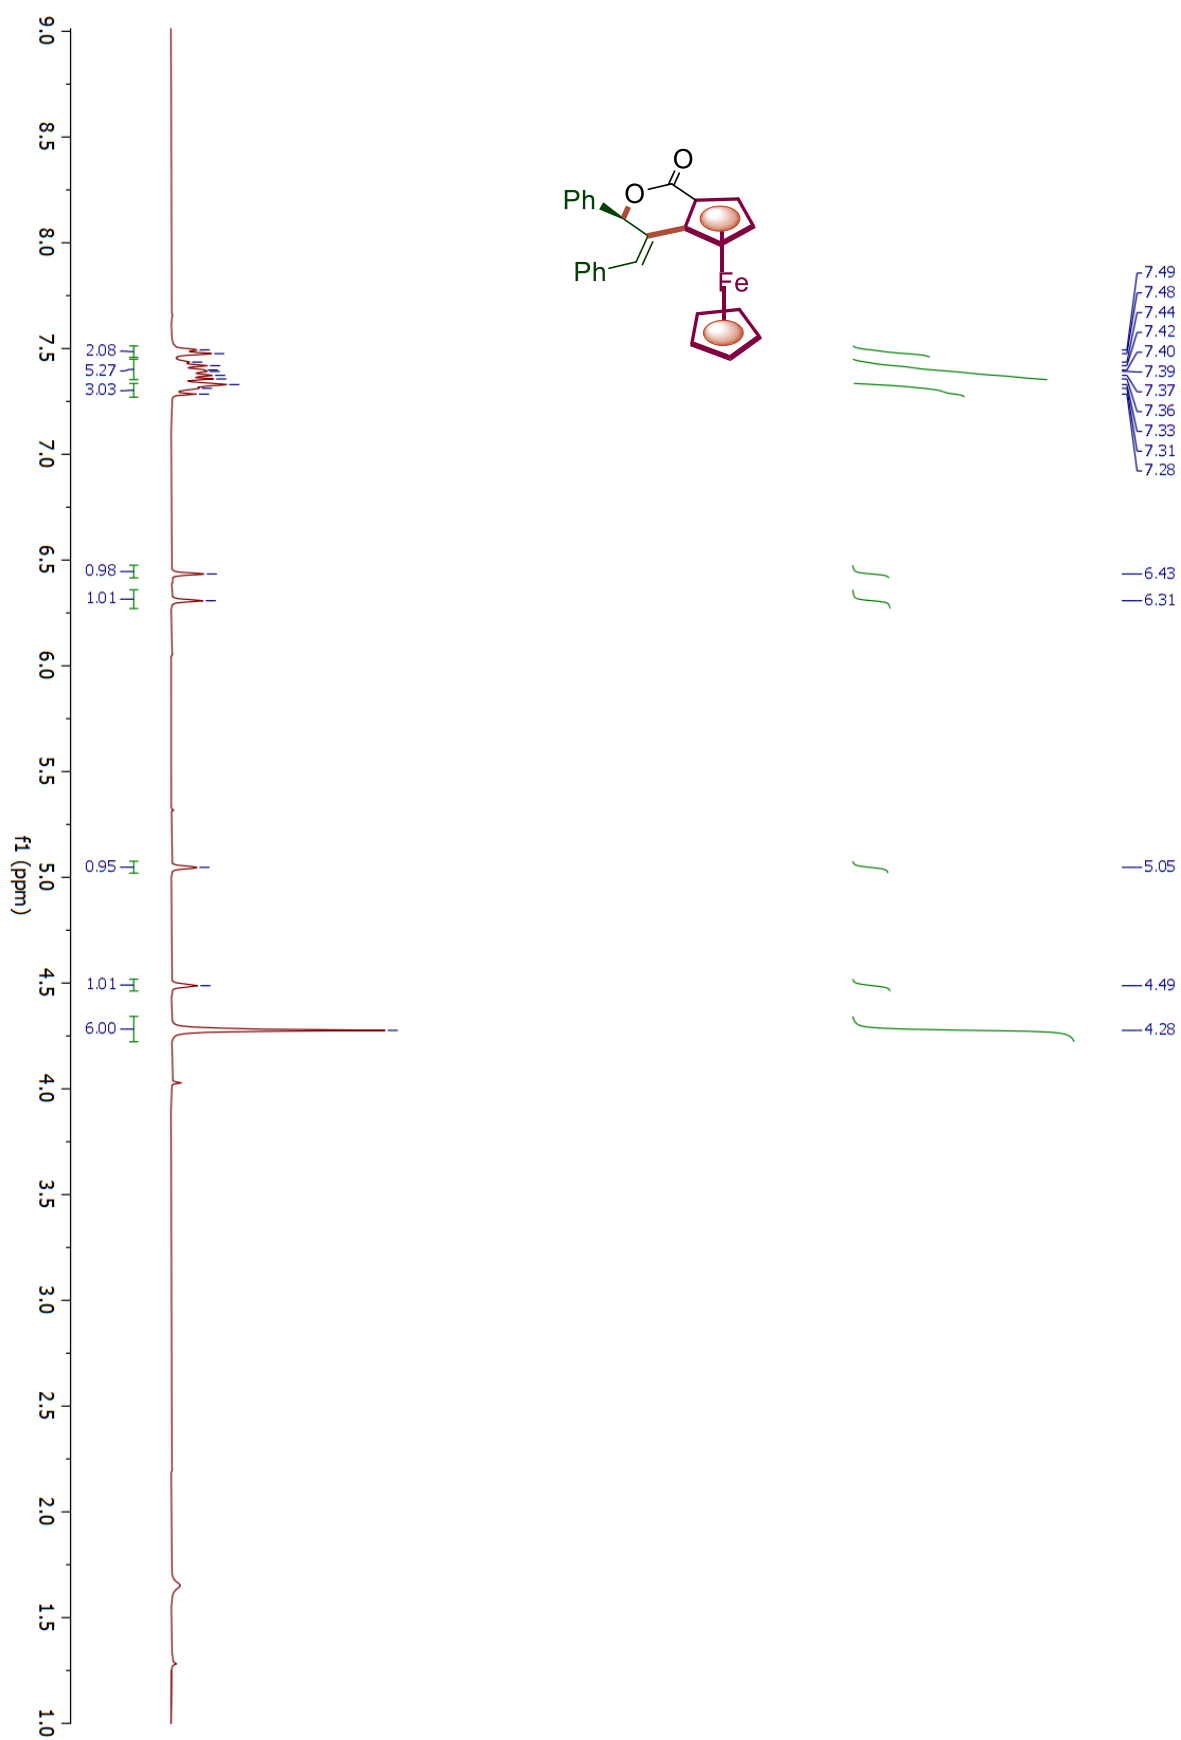

# $^{13}\text{C}\{^1\text{H}\}$ NMR Spectrum of 3i

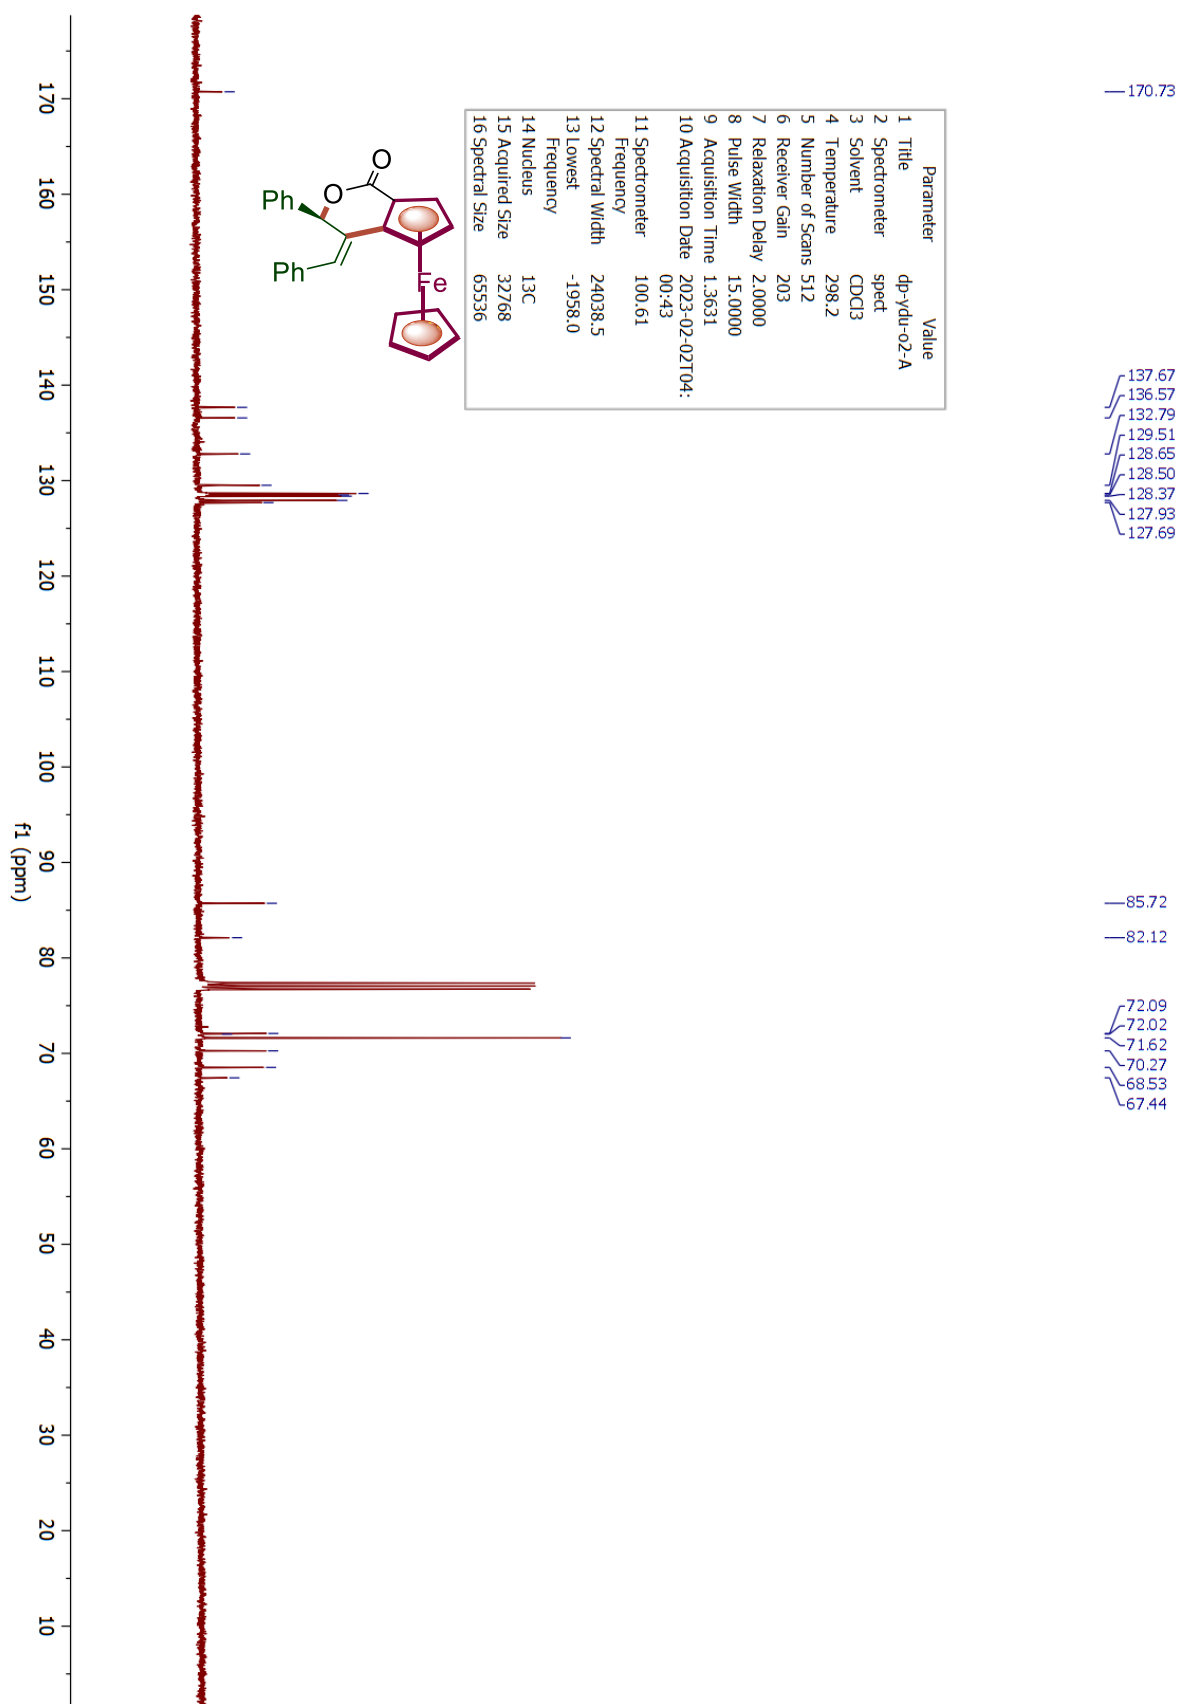

# <sup>1</sup>H NMR Spectrum of 3j

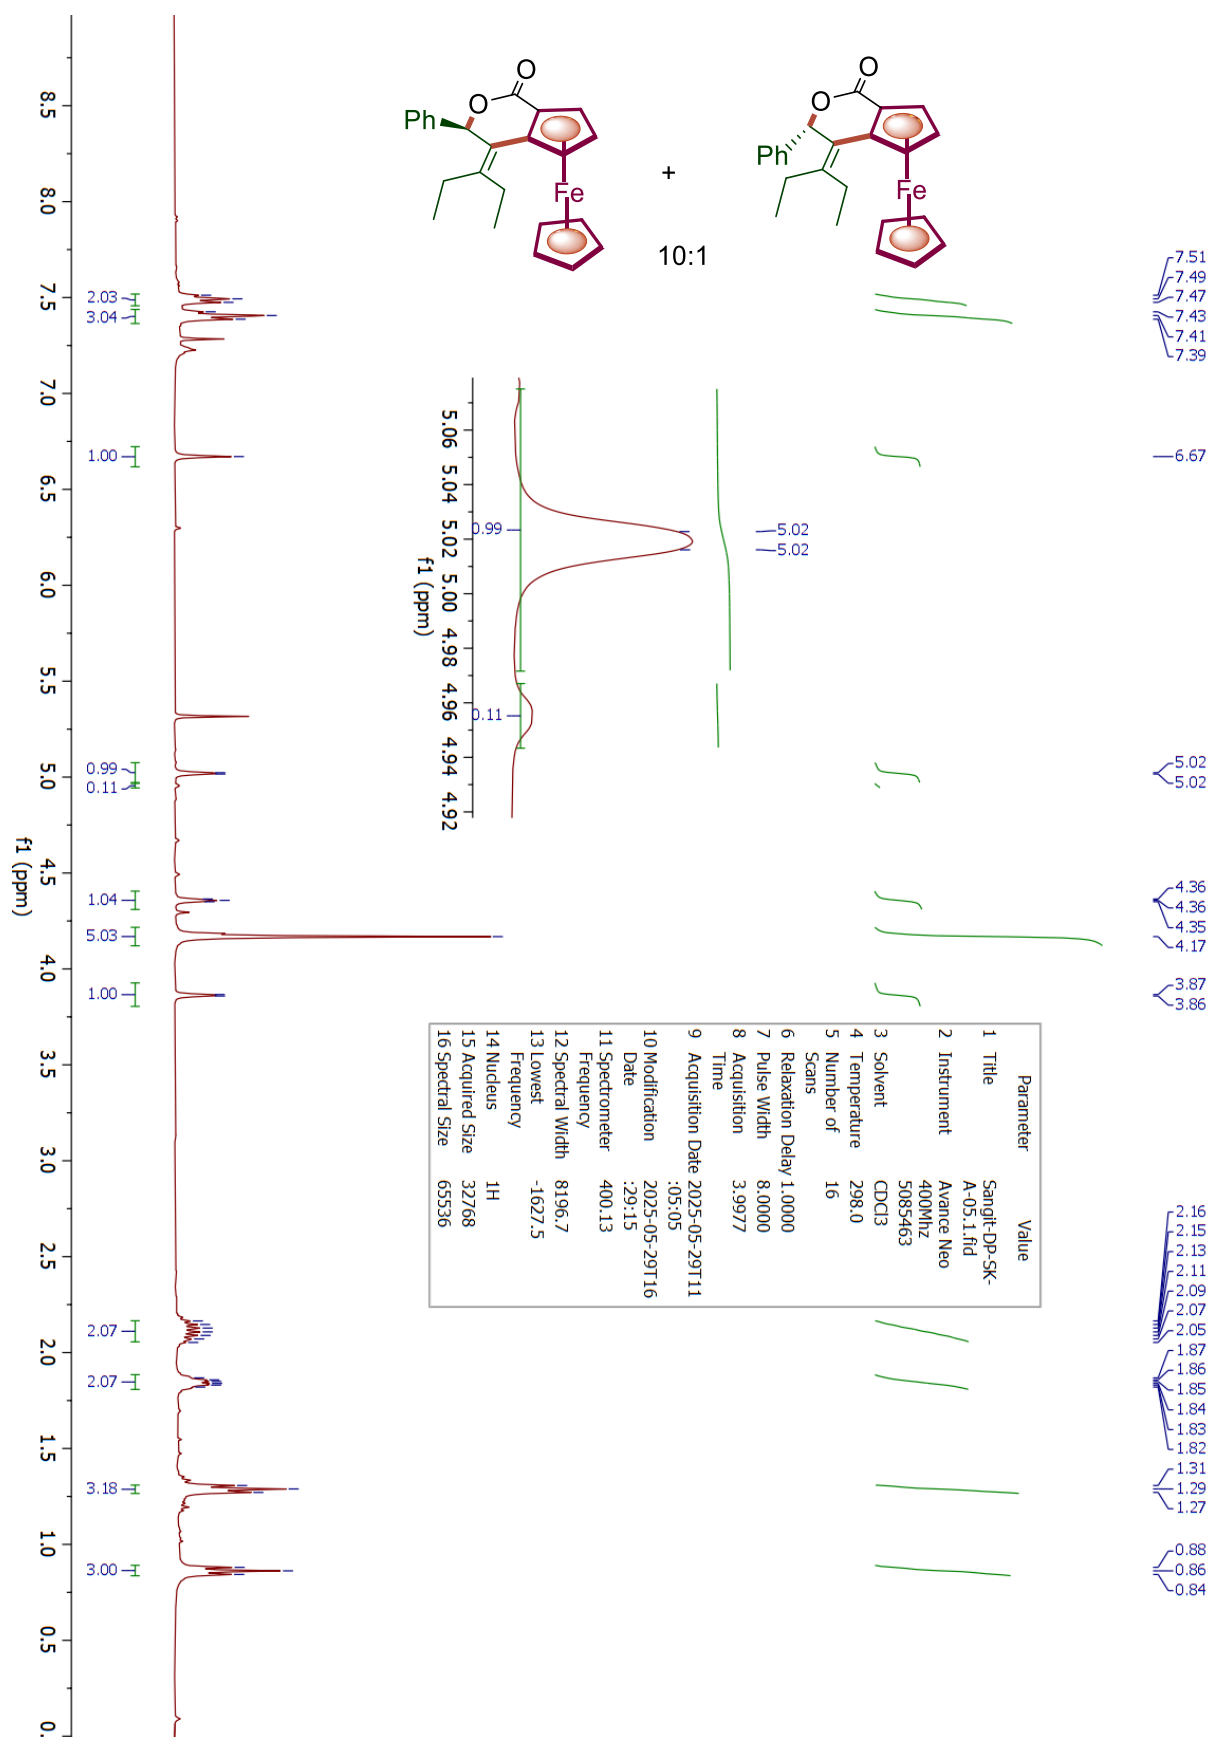

A mixture of diastereomer were observed as 10:1 in the NMR spectra

# $^{13}\text{C}\{^1\text{H}\}$ NMR Spectrum of **3j**

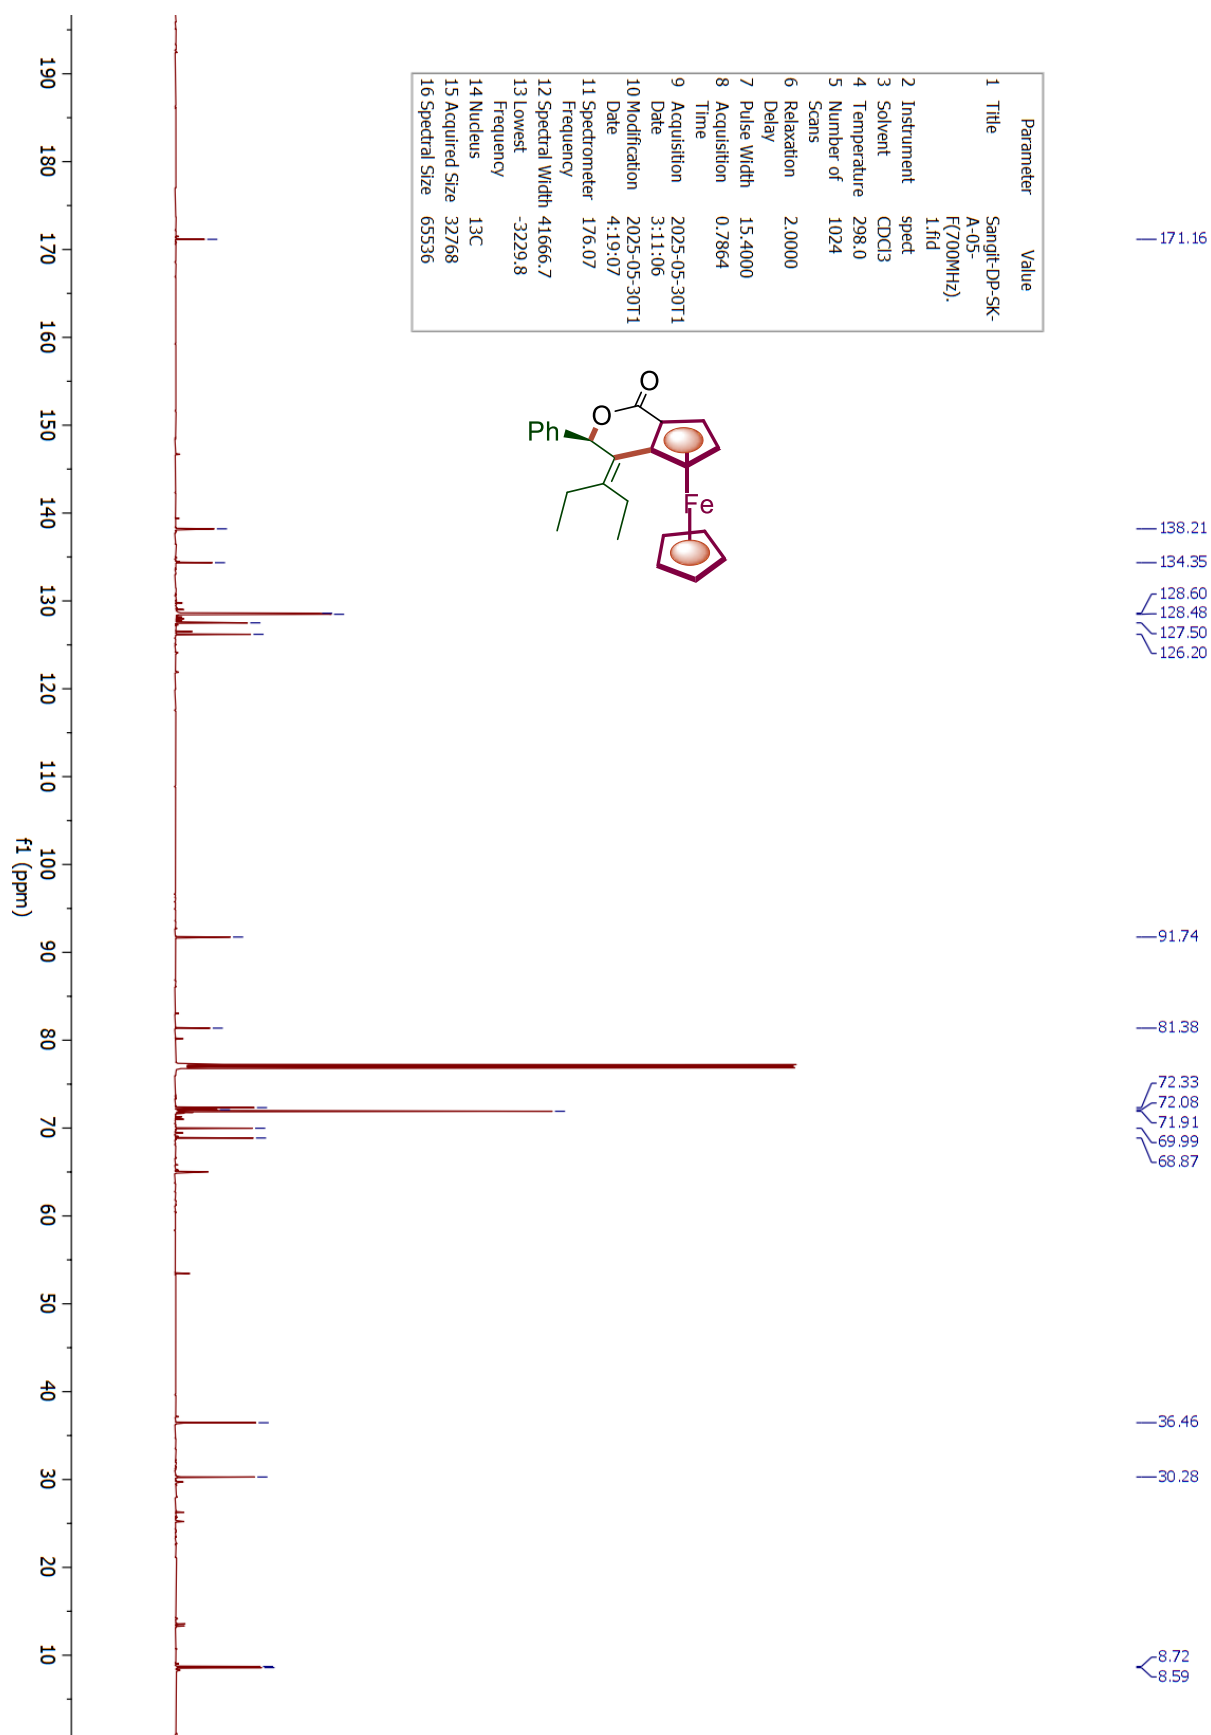

# <sup>1</sup>H NMR Spectrum of 3k

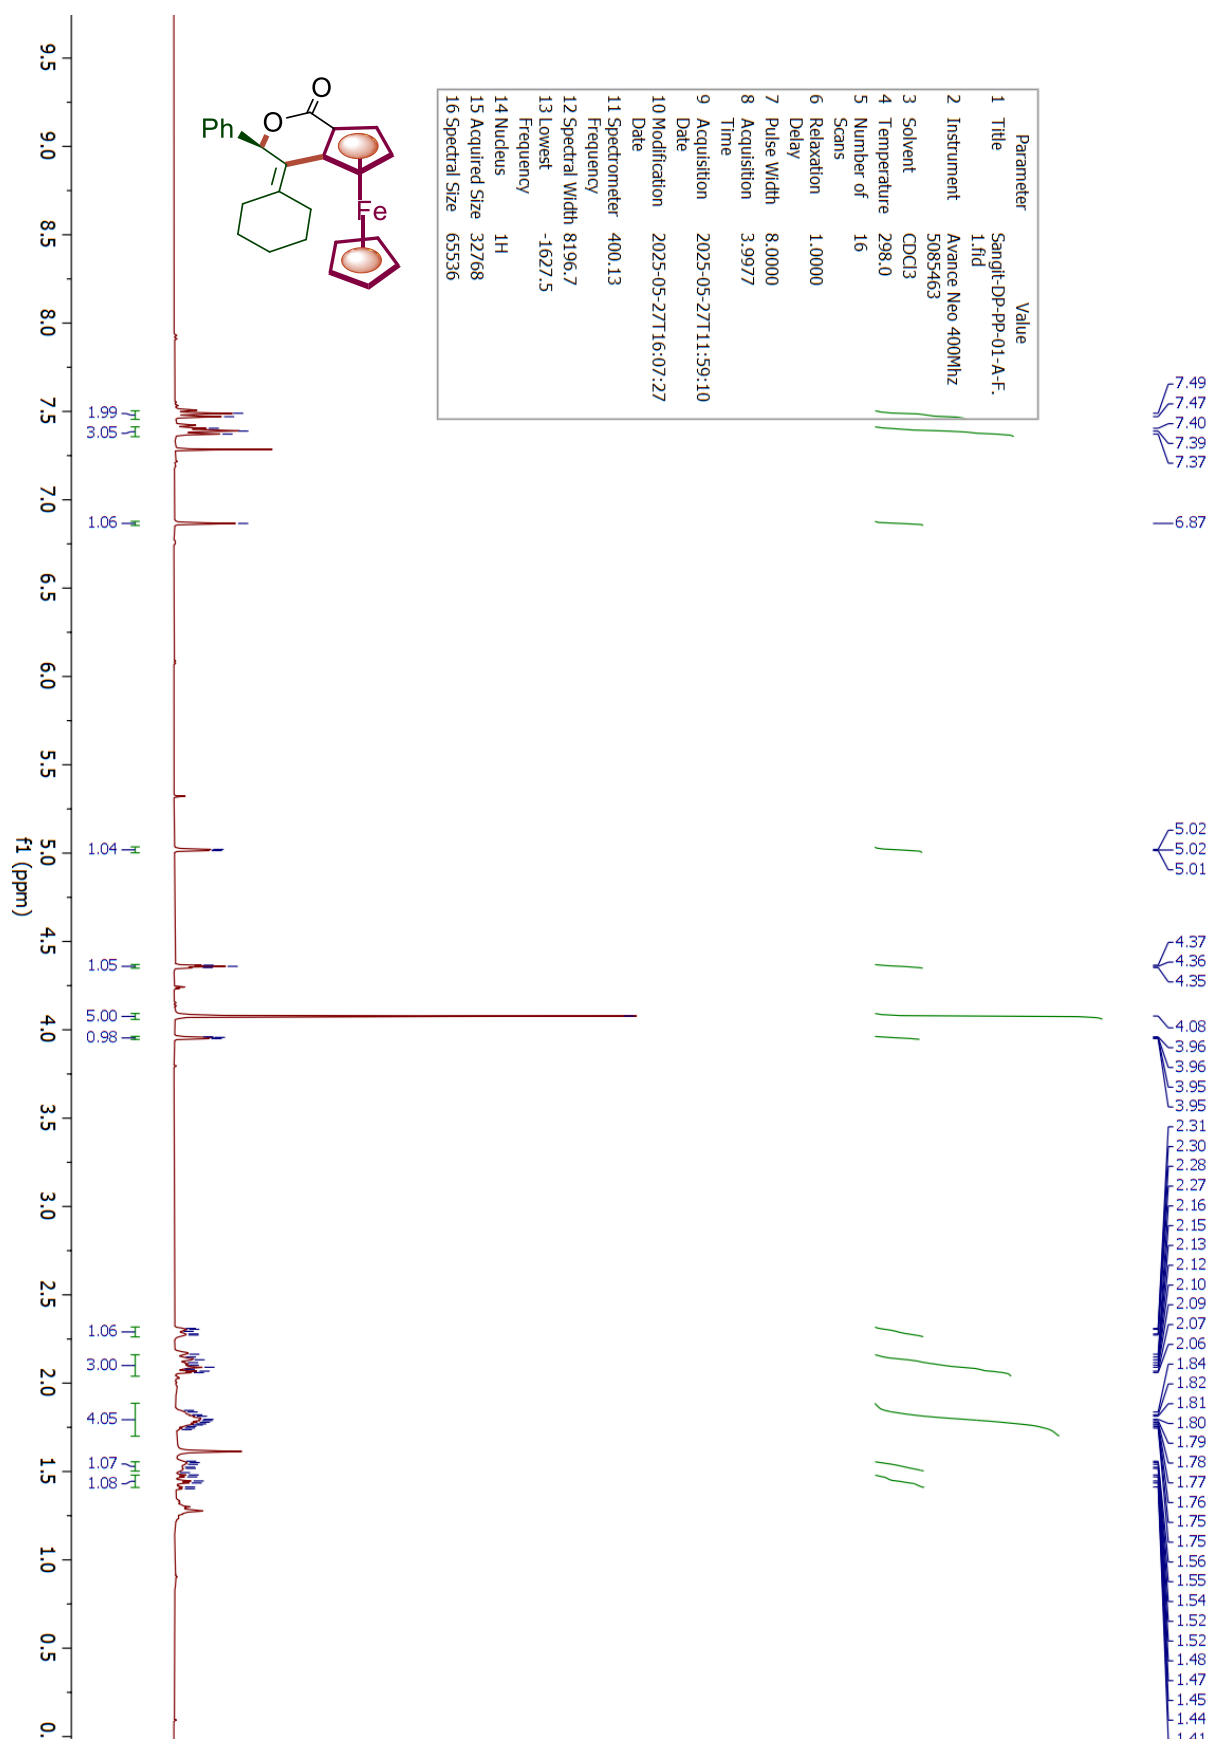

# $^{13}\text{C}\{^1\text{H}\}$ NMR Spectrum of 3k

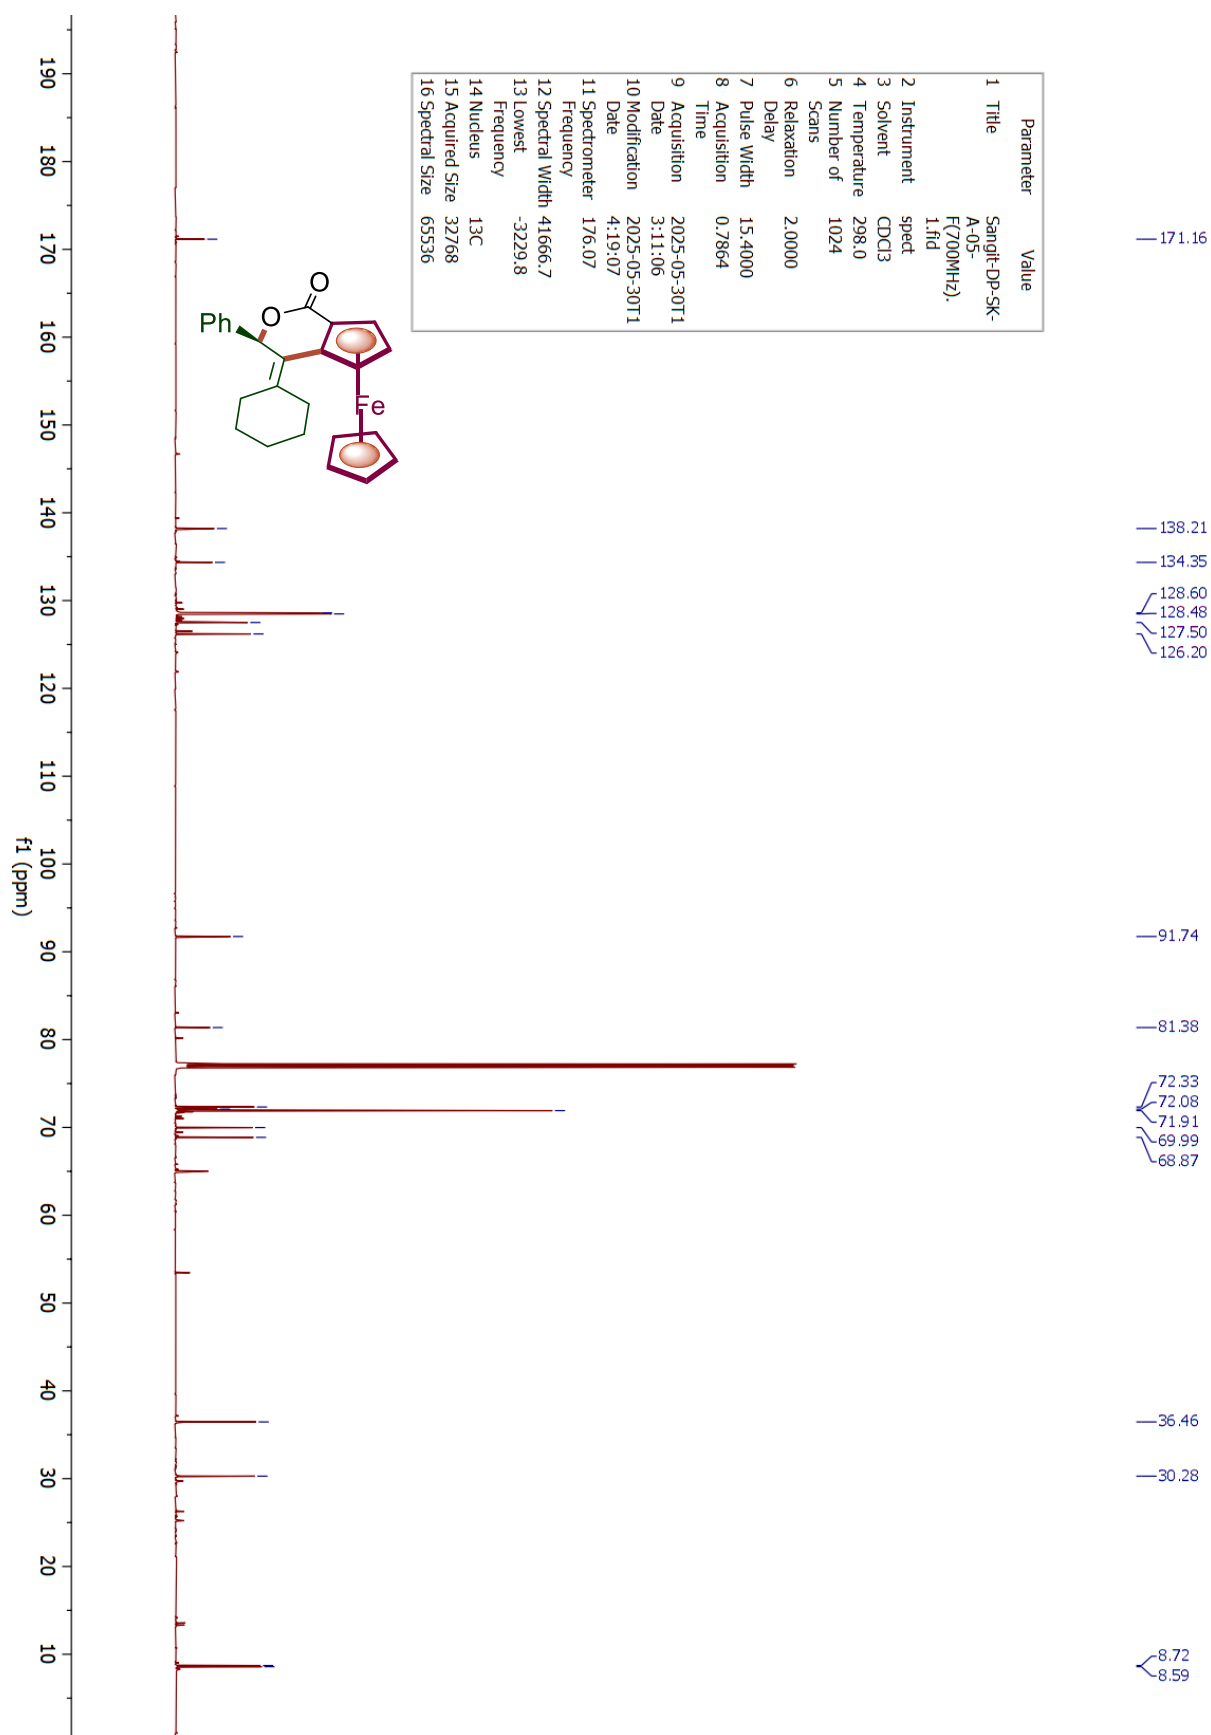



# <sup>1</sup>H NMR Spectrum of 3l

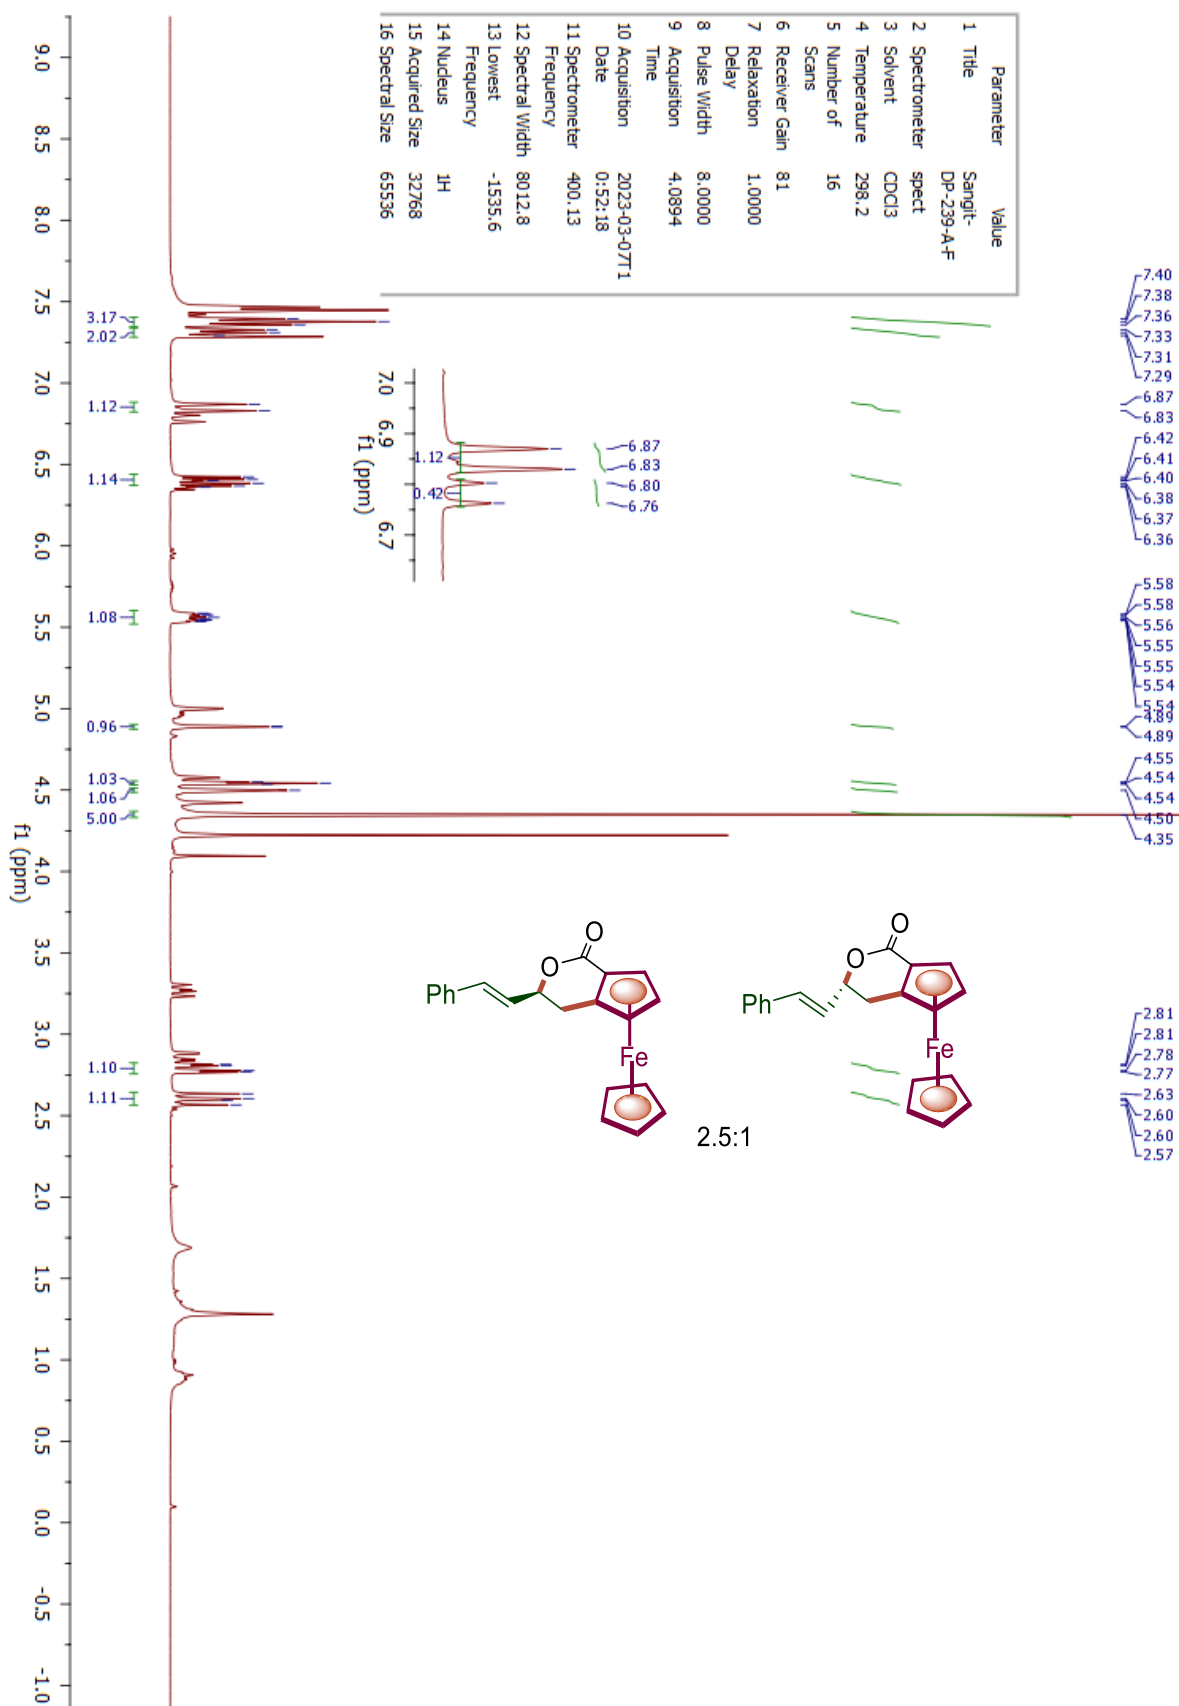

A mixture of diastereomer were observed as 2.5:1 in the NMR spectra

# $^{13}\text{C}\{^1\text{H}\}$ NMR Spectrum of 3l

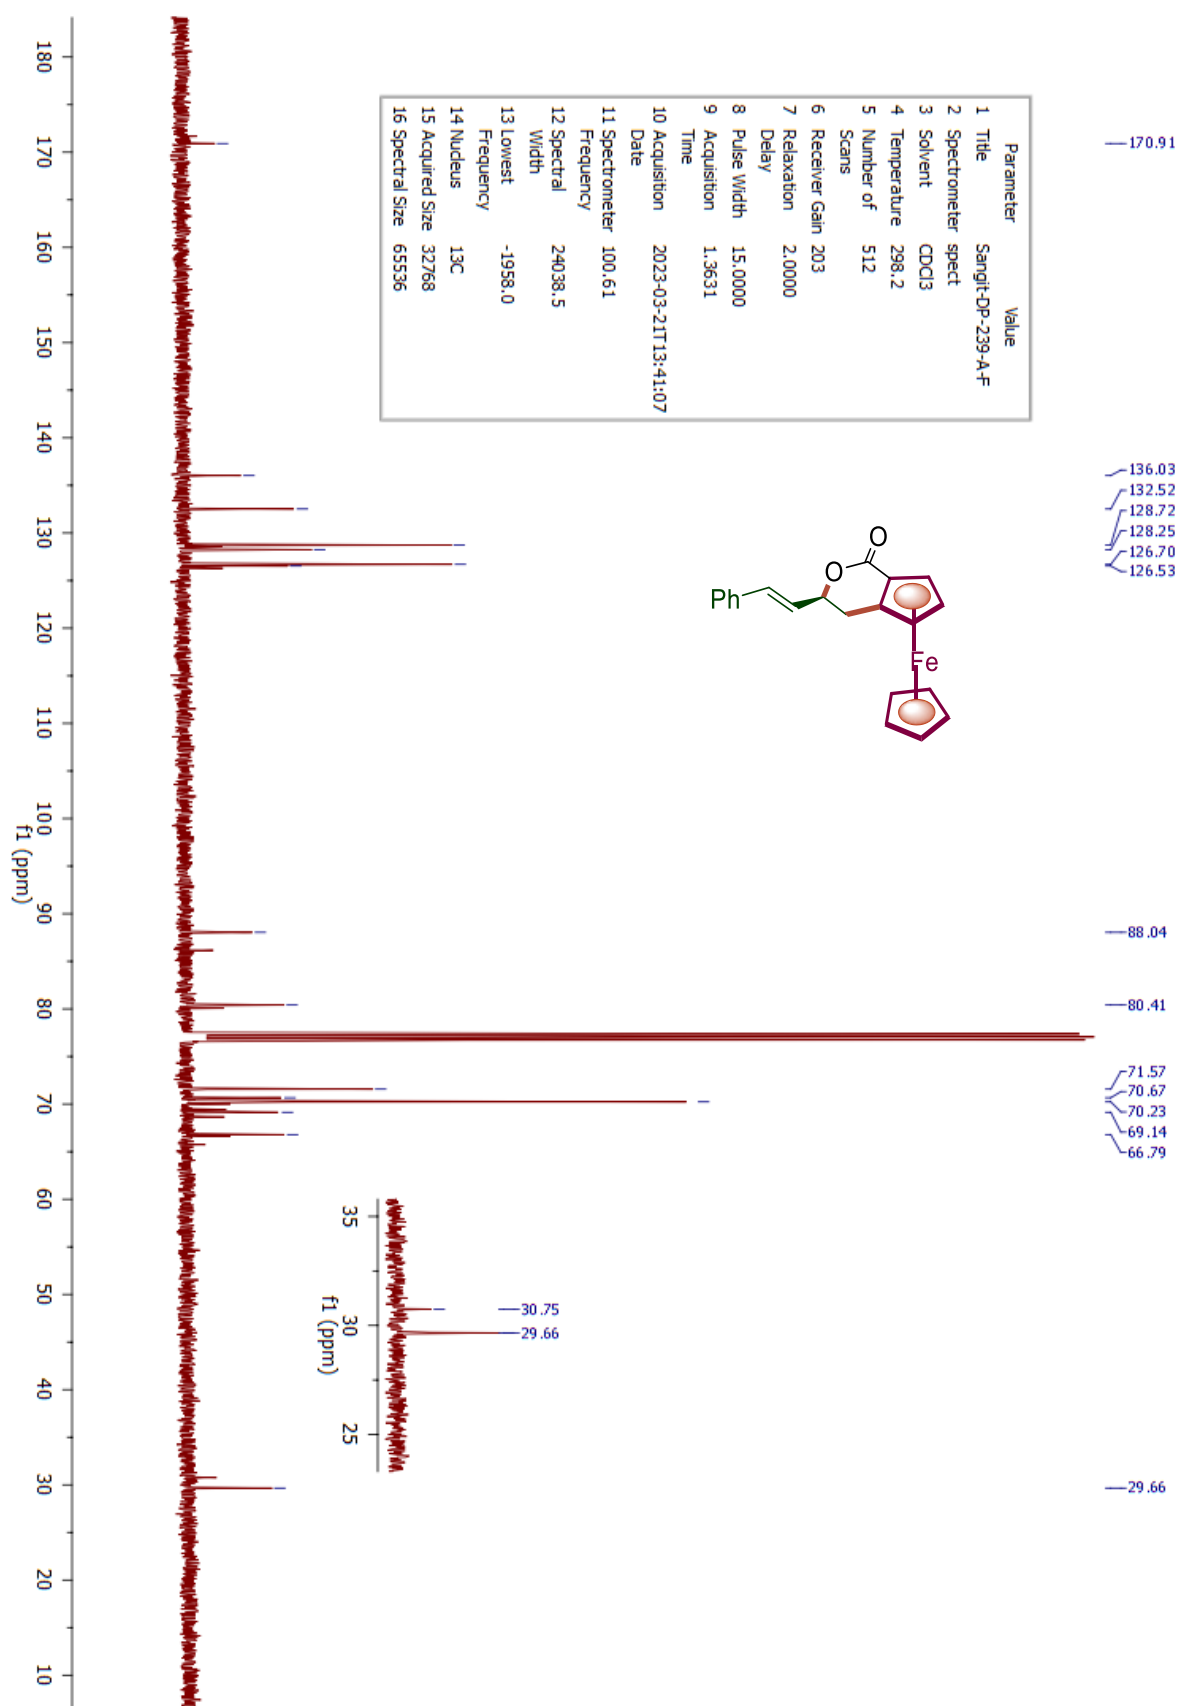

# <sup>1</sup>H NMR Spectrum of 3m

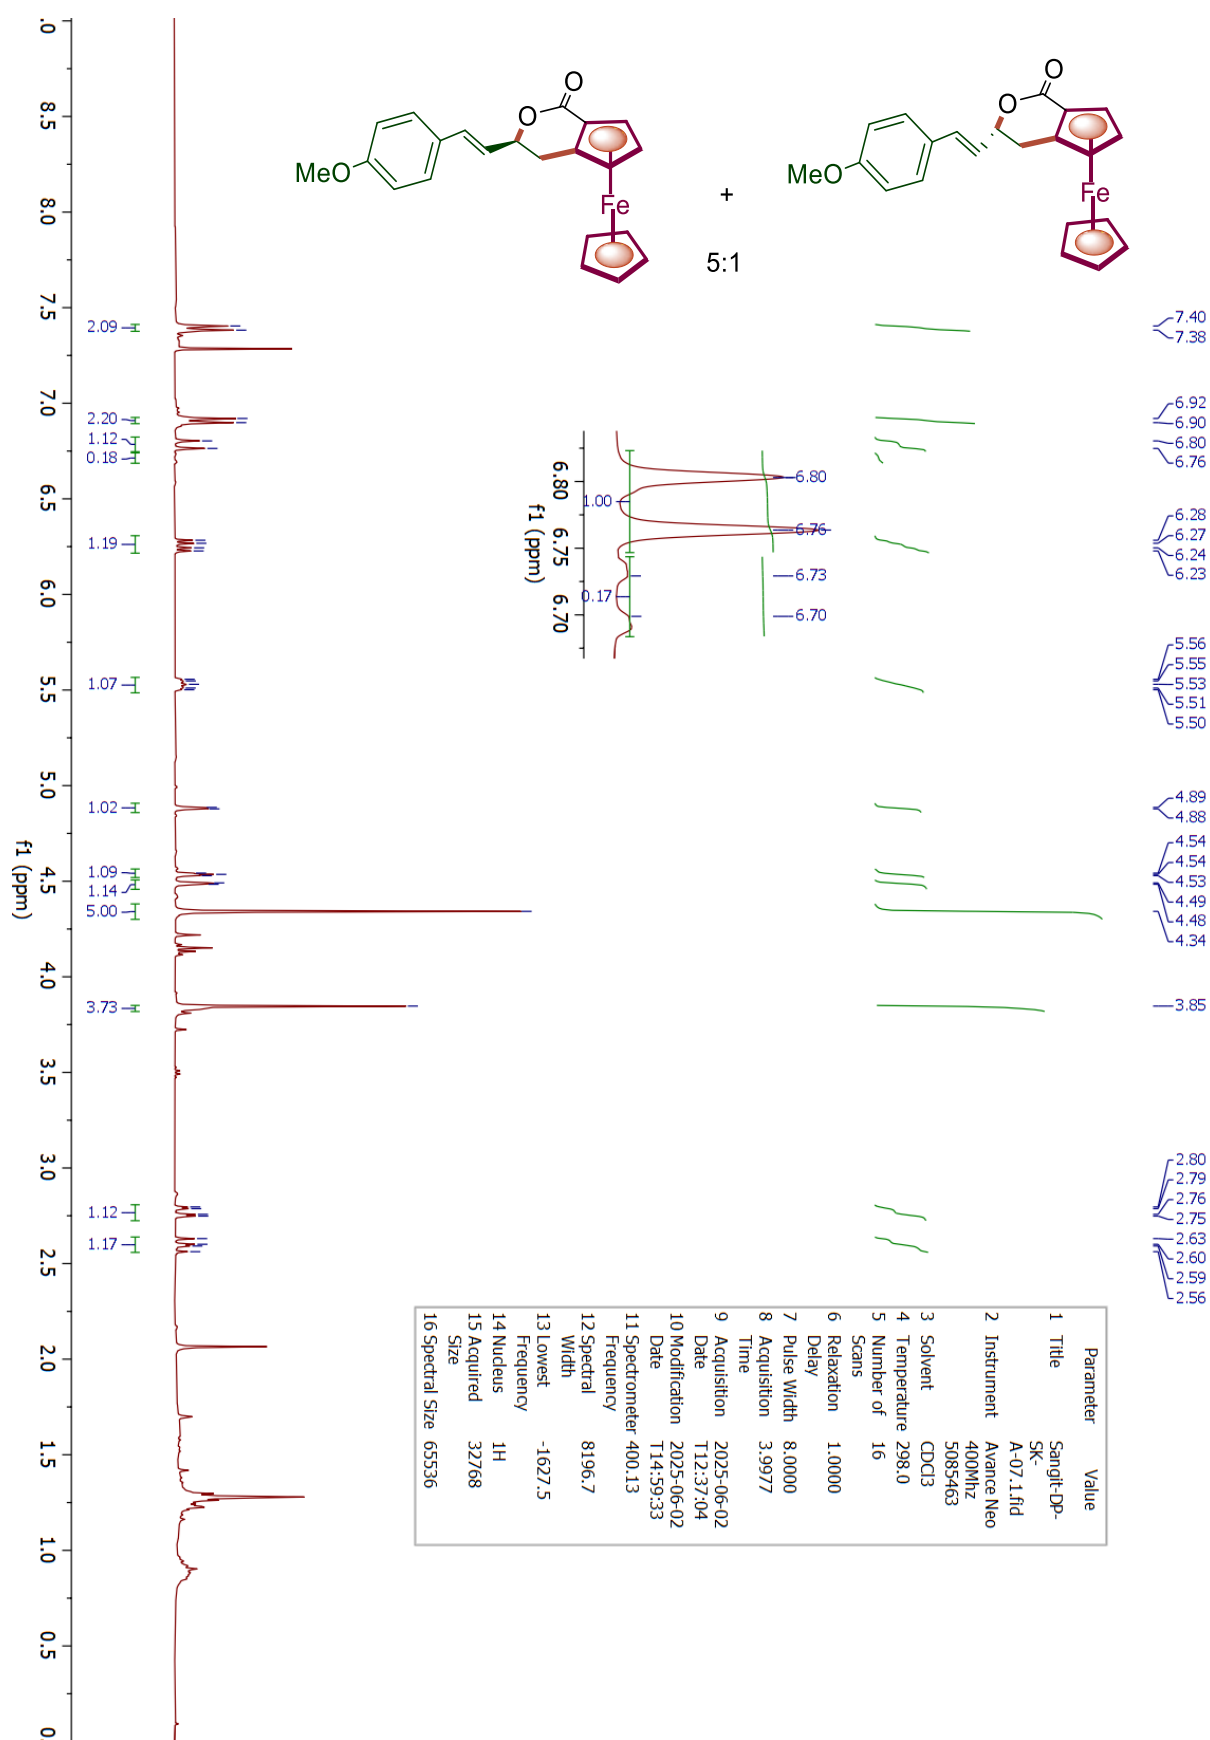

A mixture of diastereomer were observed as 5:1 in the NMR spectra

# $^{13}\text{C}\{^1\text{H}\}$ NMR Spectrum of 3m

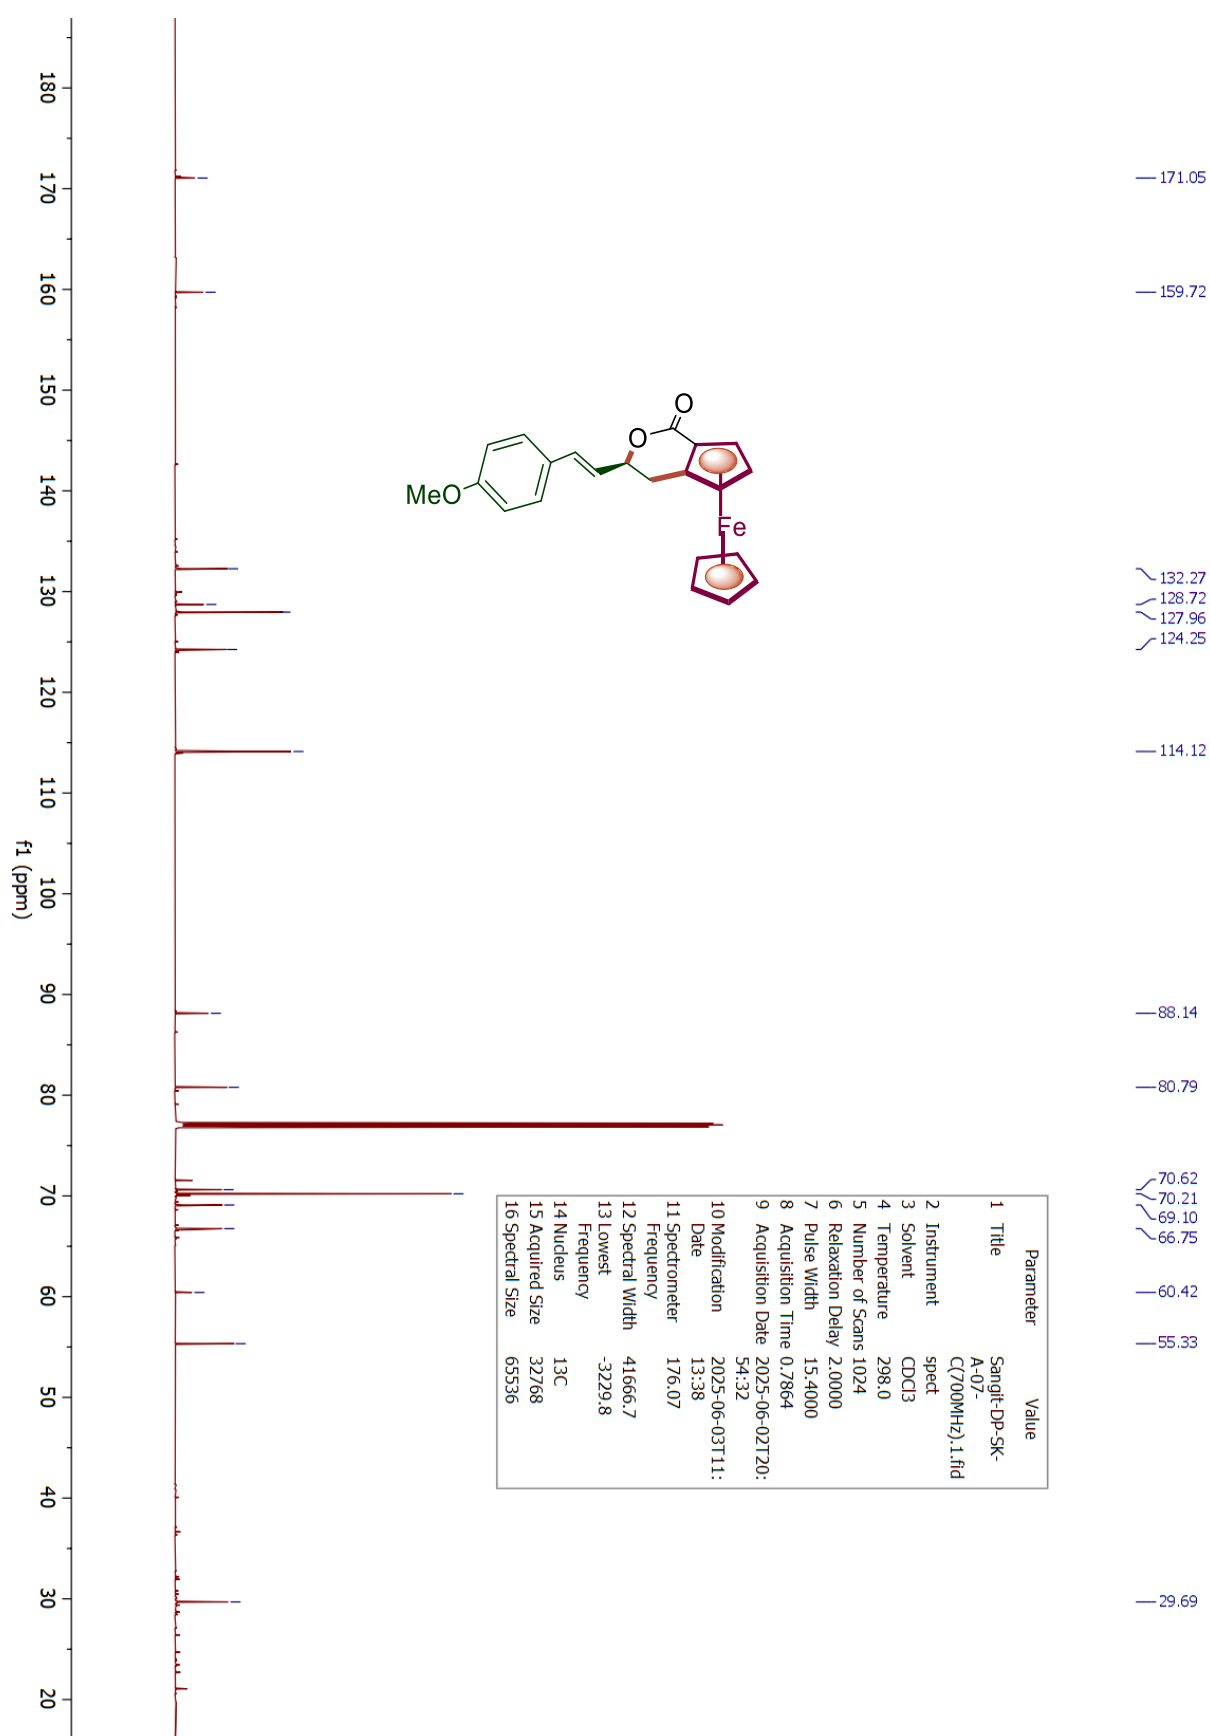

# <sup>1</sup>H NMR Spectrum of 3n

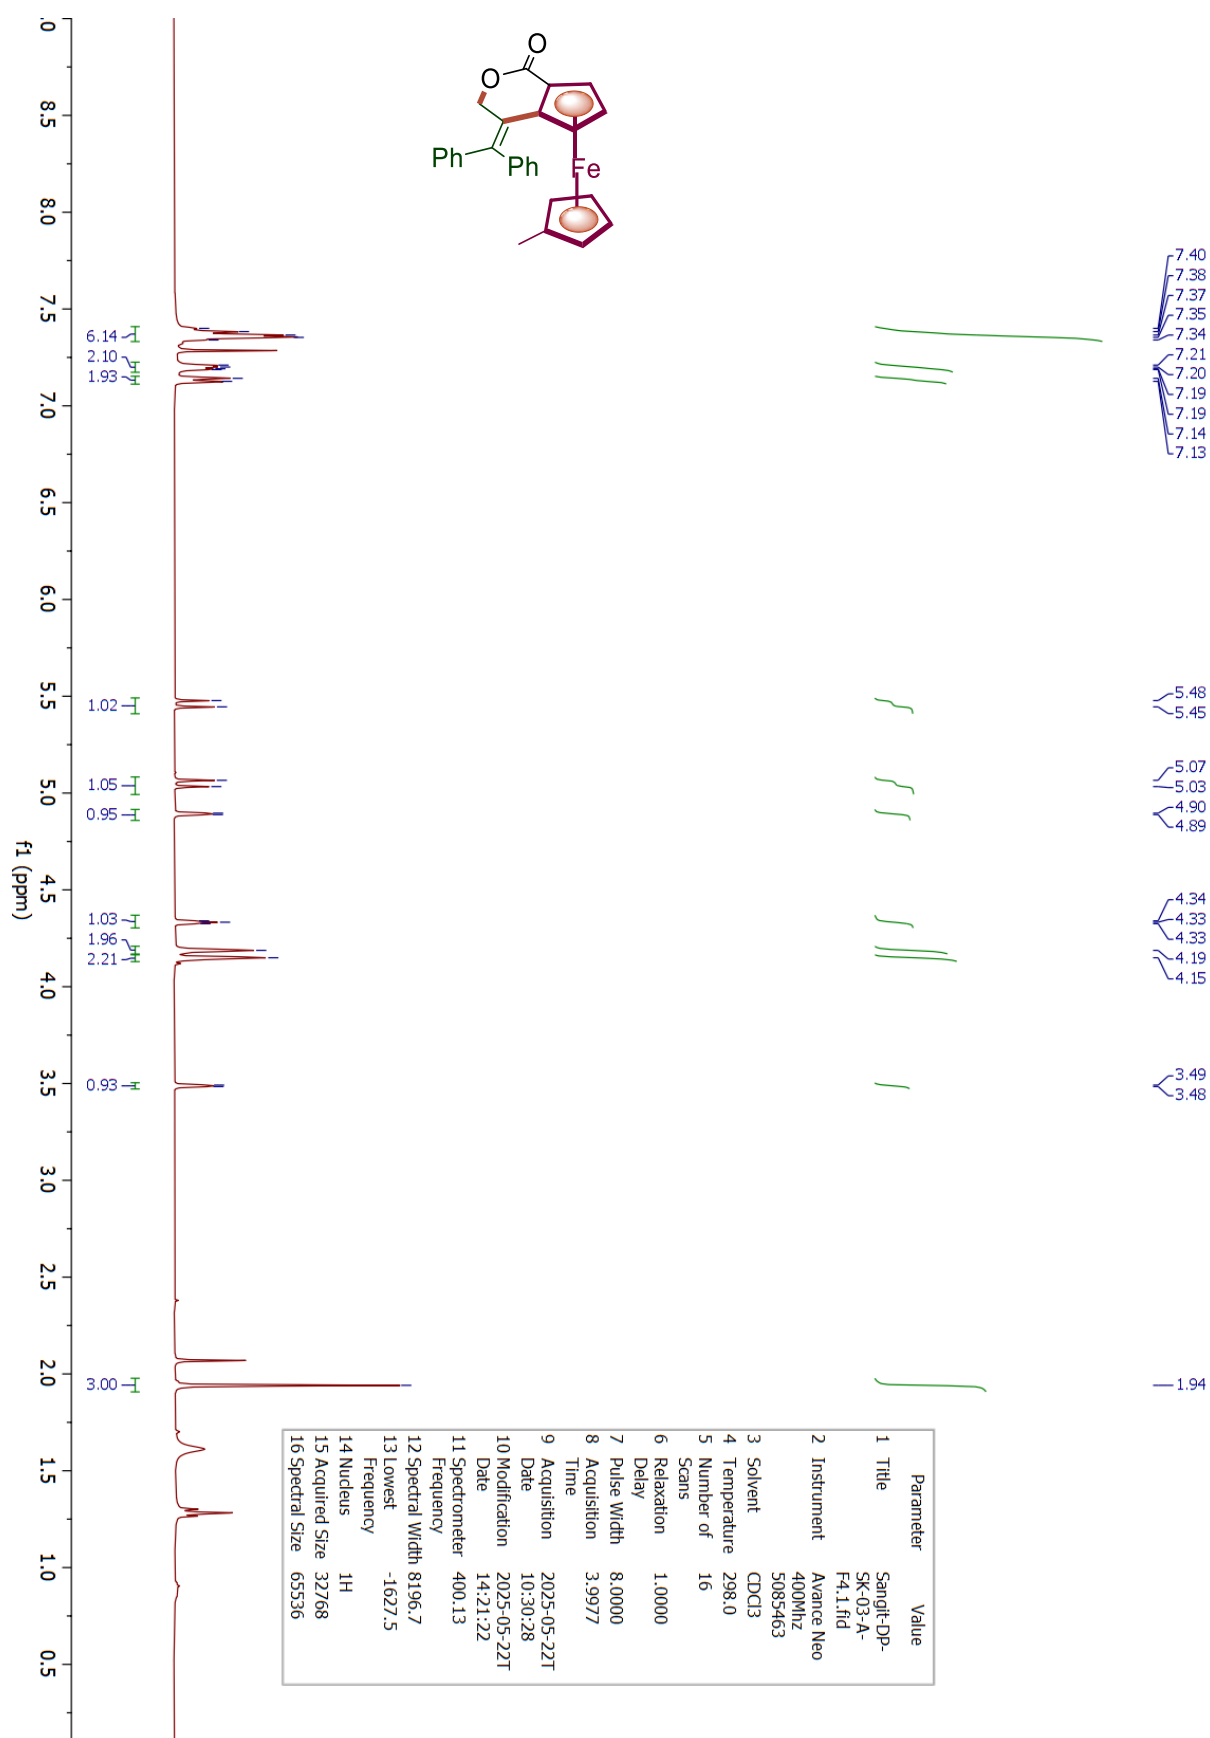

# $^{13}\text{C}\{^1\text{H}\}$ NMR Spectrum of 3n

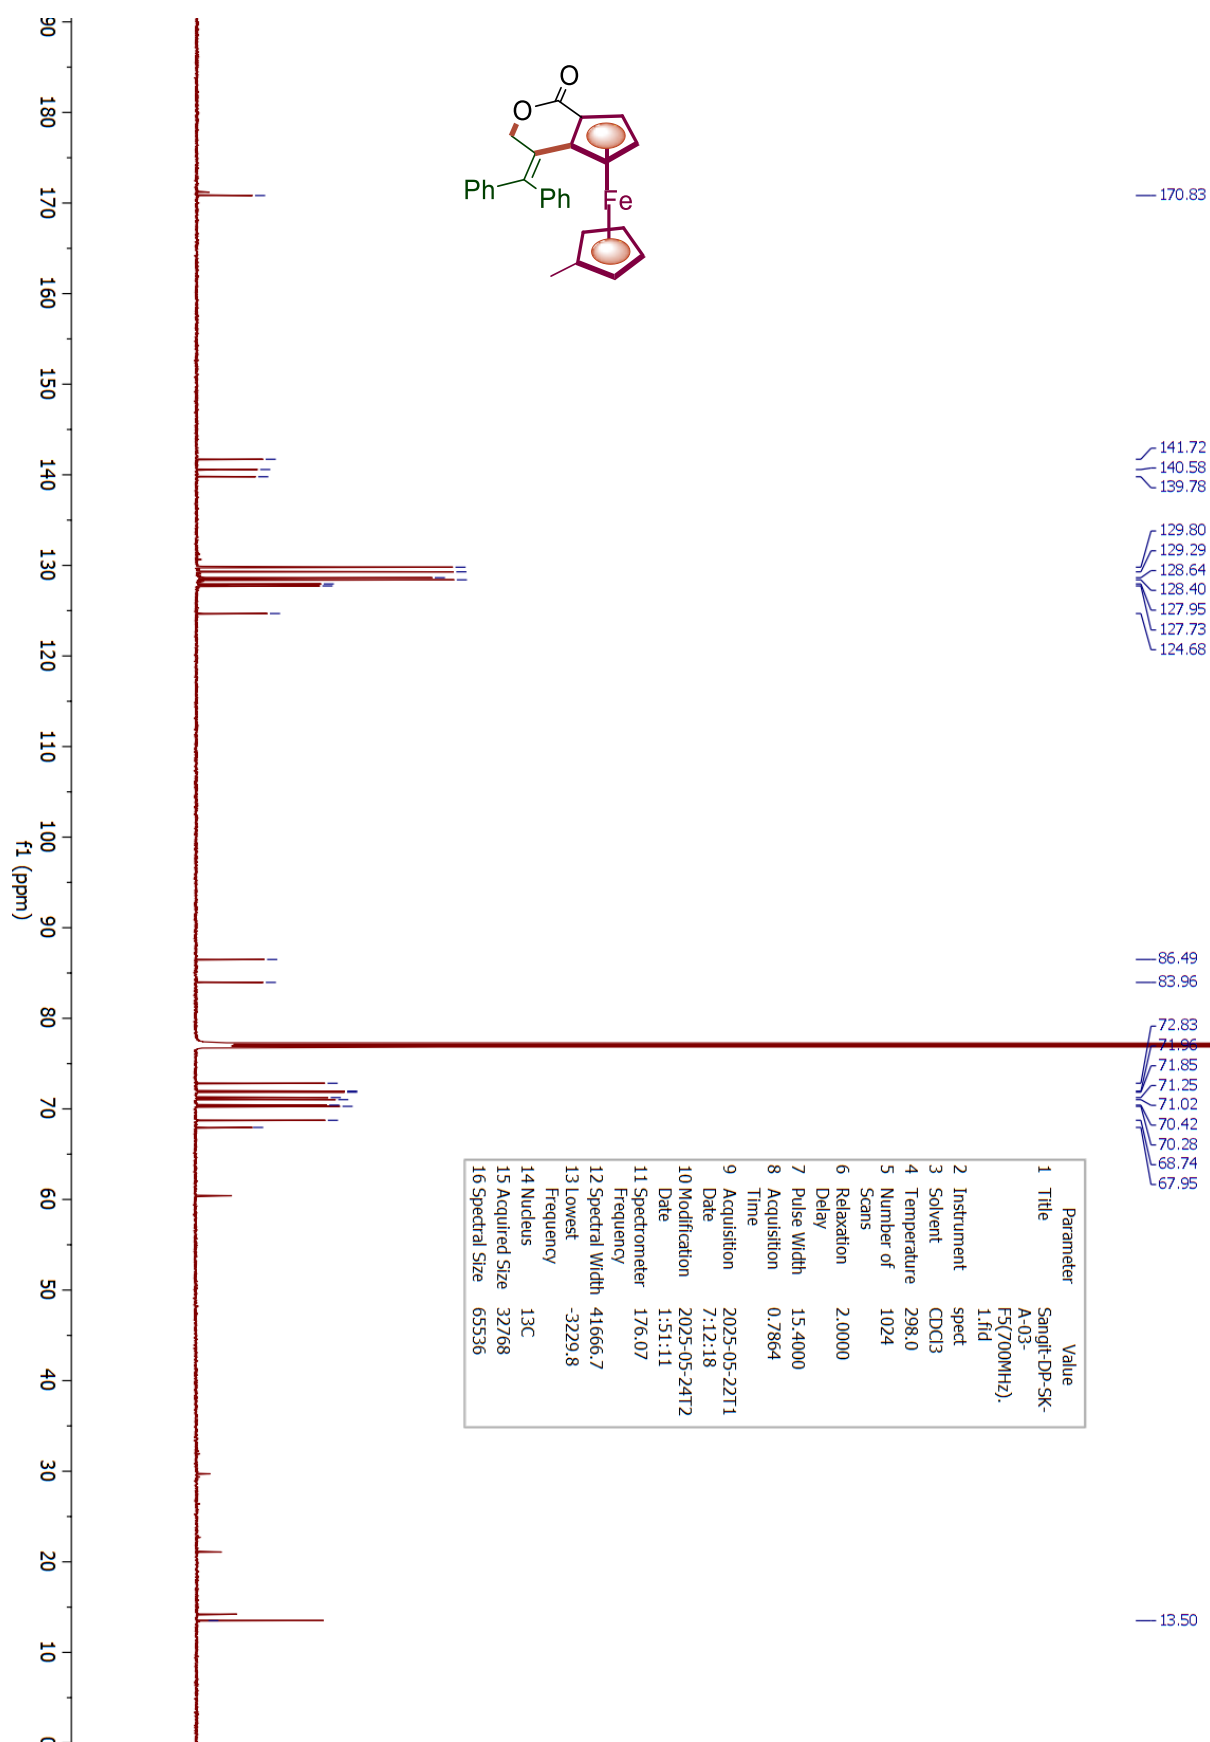

# <sup>1</sup>H NMR Spectrum of 3o

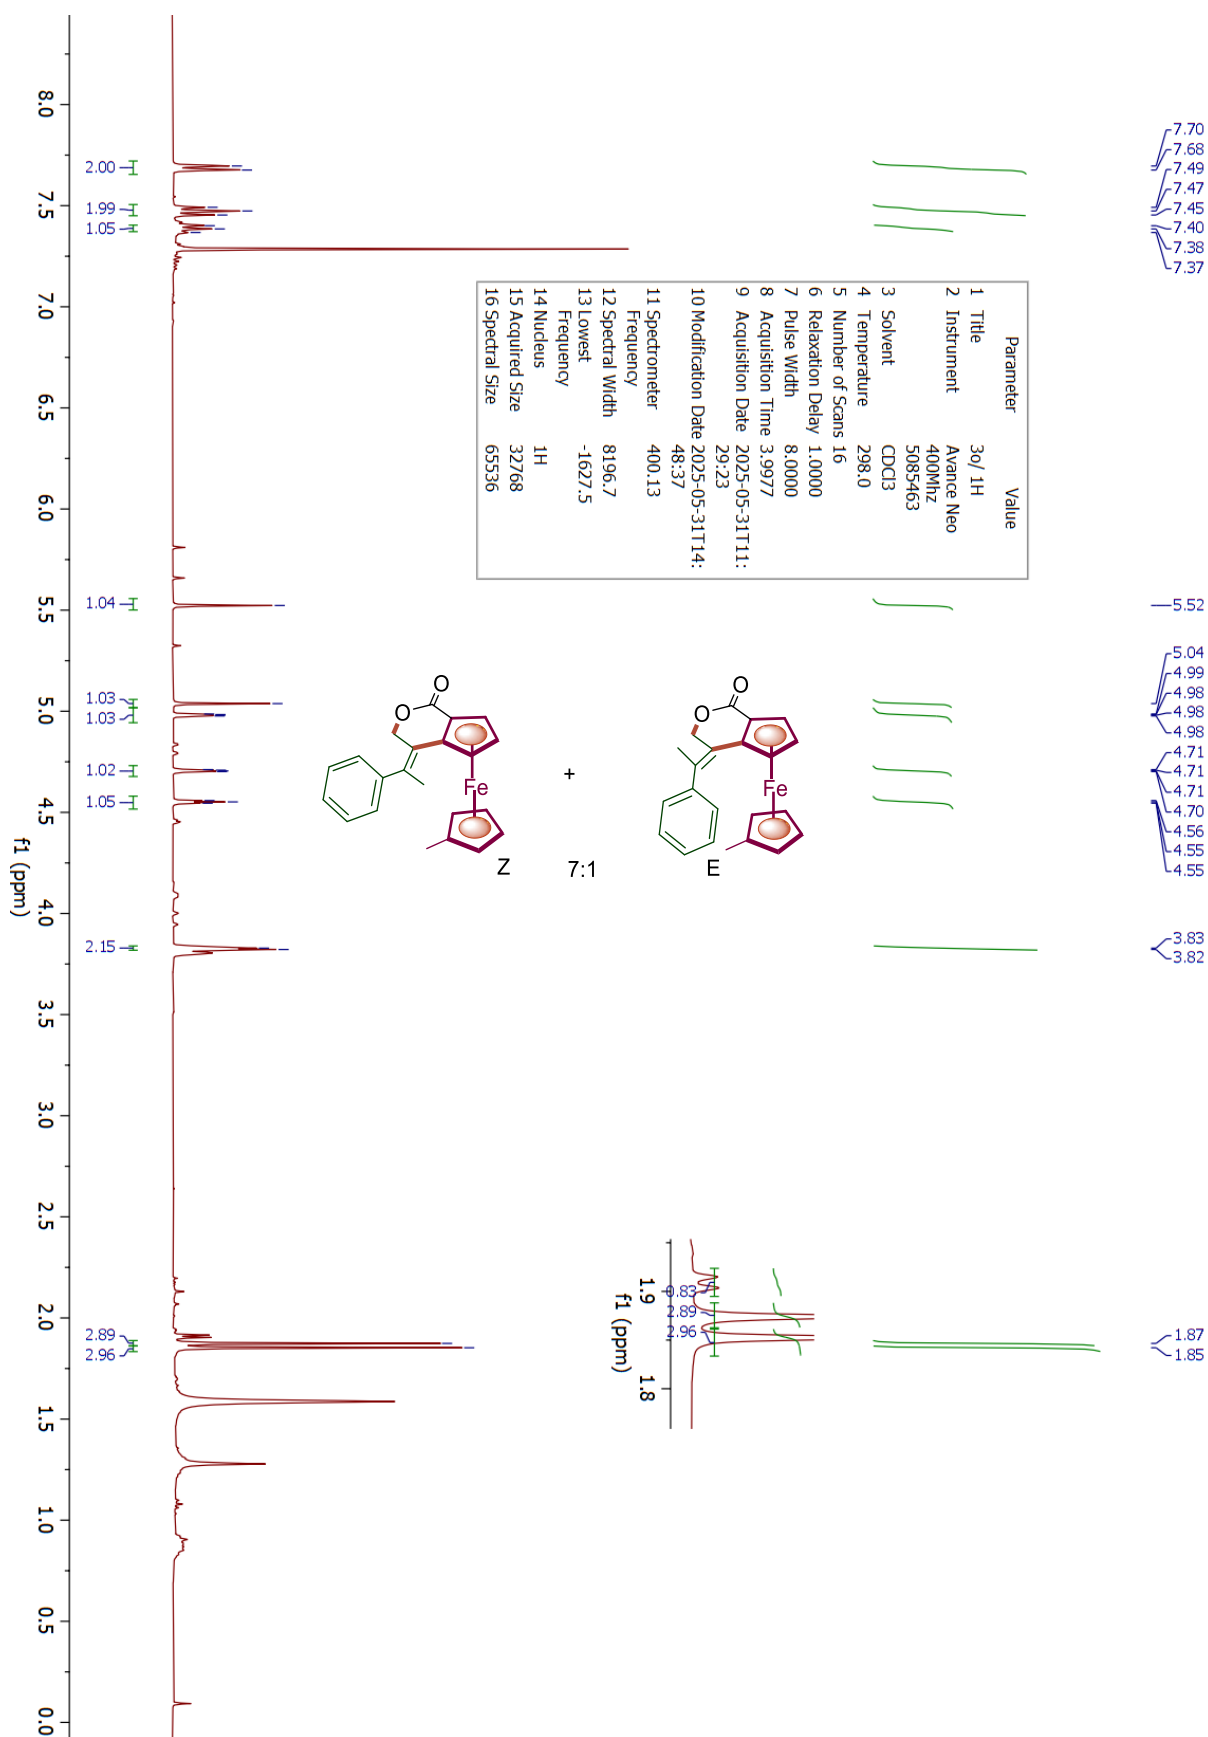

A mixture of E:Z regio-isomer were observed as 1:7 in the NMR spectra

# $^{13}\text{C}\{^1\text{H}\}$ NMR Spectrum of 3o

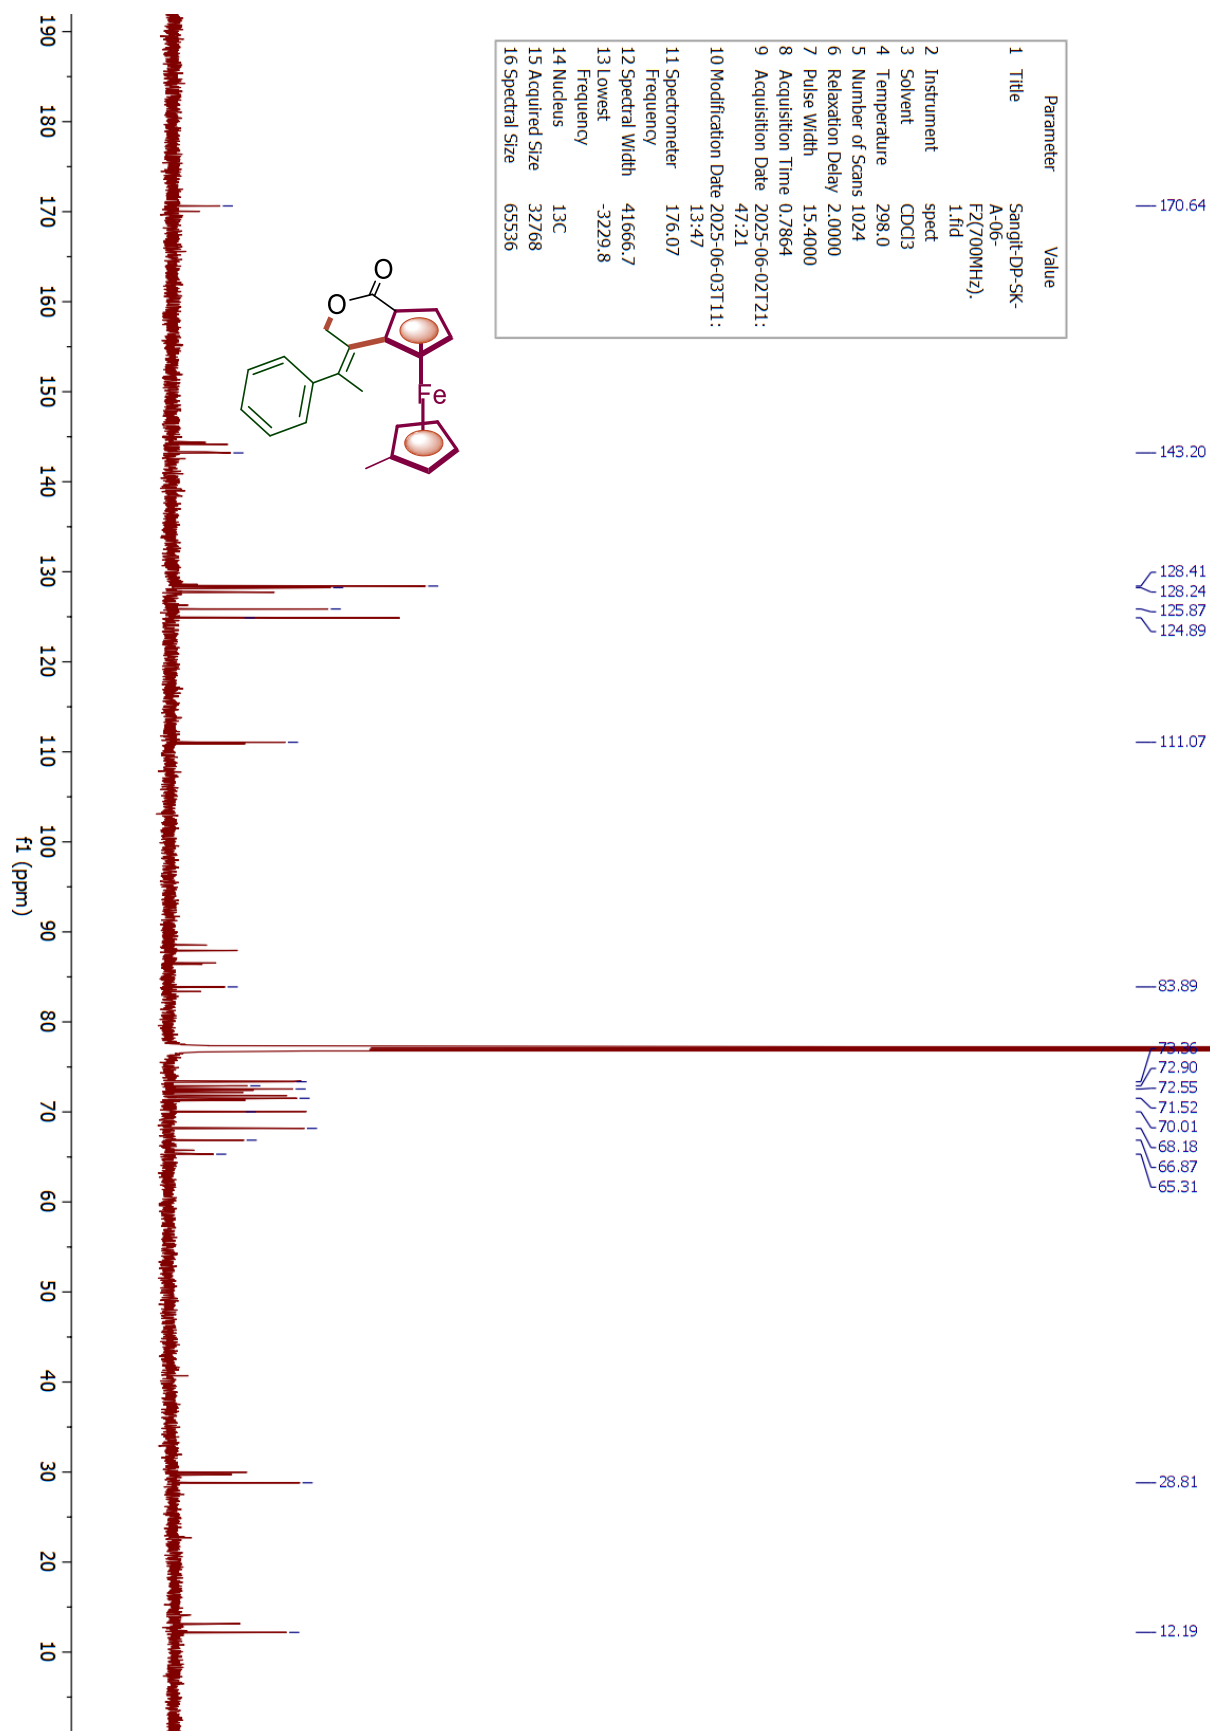



# <sup>1</sup>H NMR Spectrum of 3p

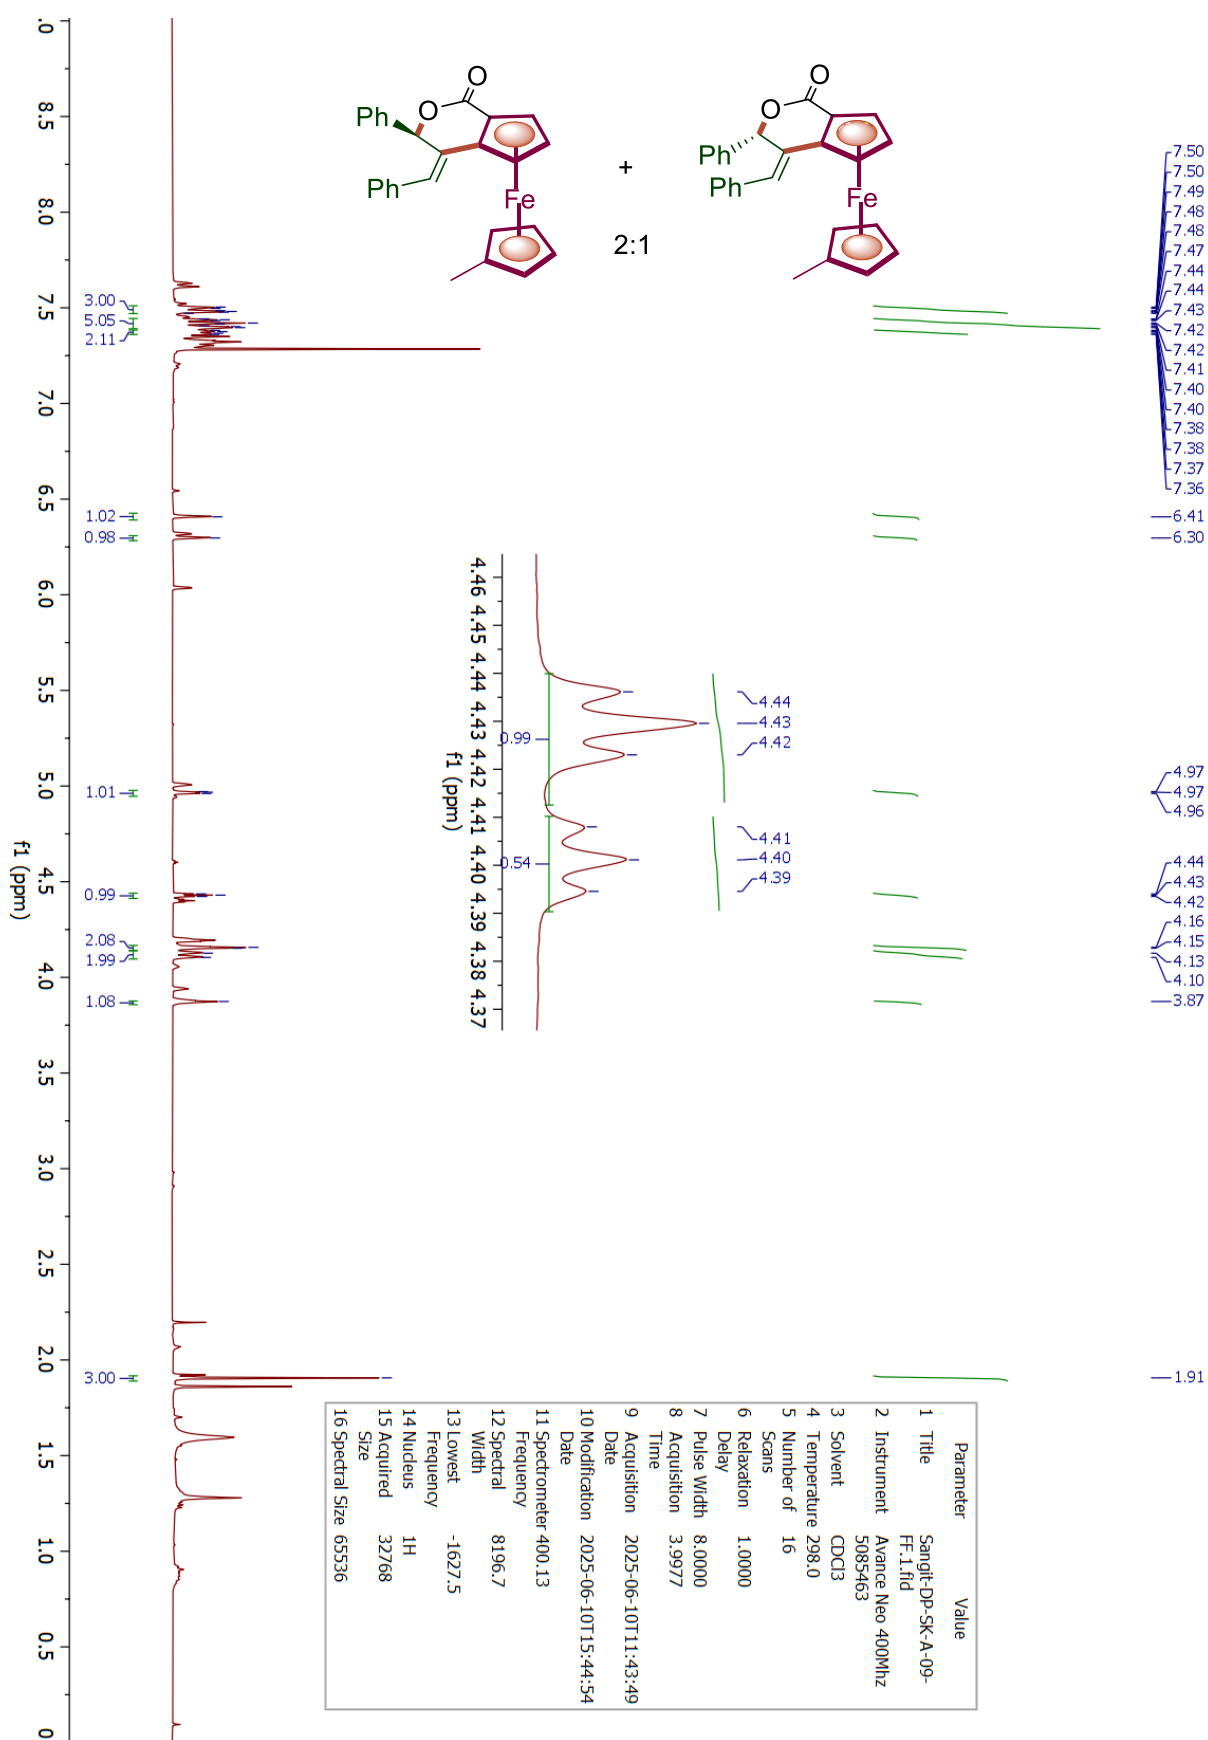

A mixture of diastereomer were observed as 2:1 in the NMR spectra

# $^{13}\text{C}\{^1\text{H}\}$ NMR Spectrum of 3p

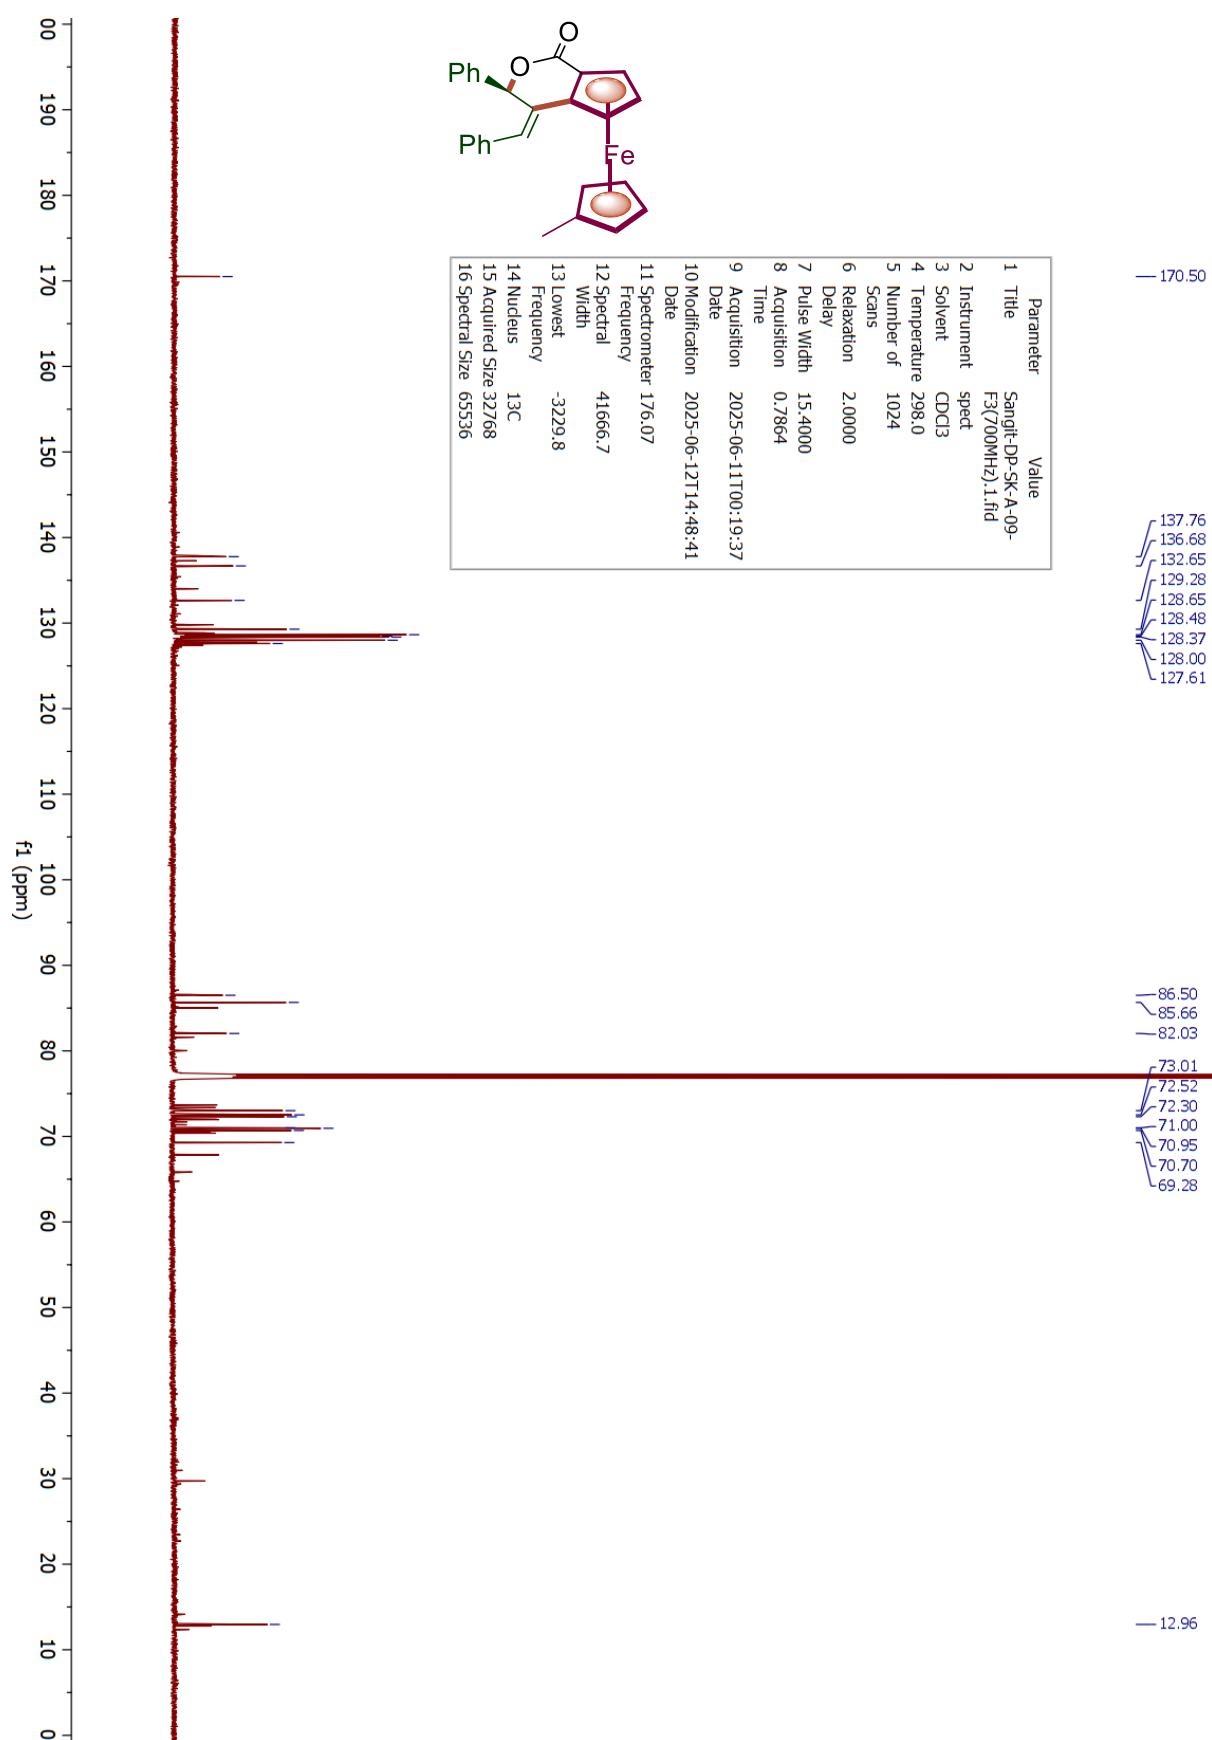

# <sup>1</sup>H NMR Spectrum of 3q

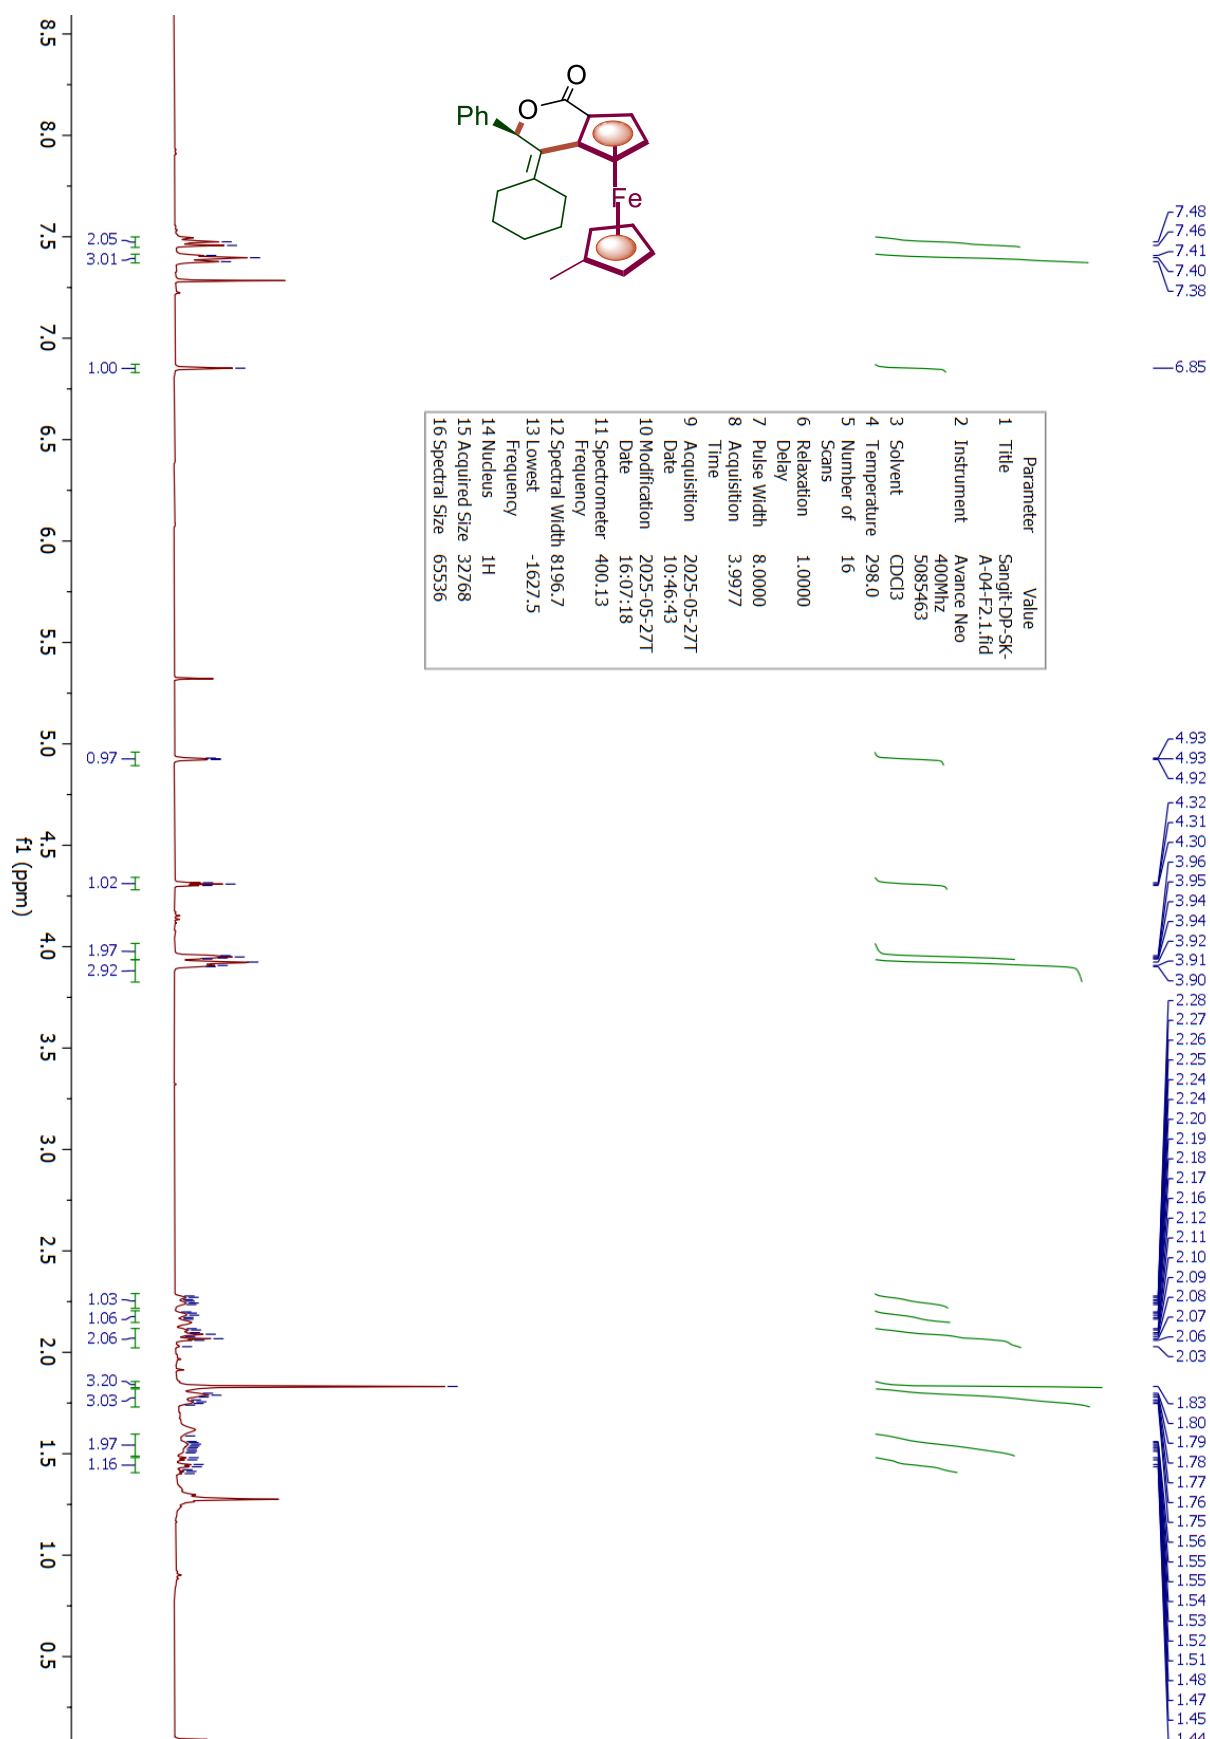

# $^{13}\text{C}\{^1\text{H}\}$ NMR Spectrum of 3q

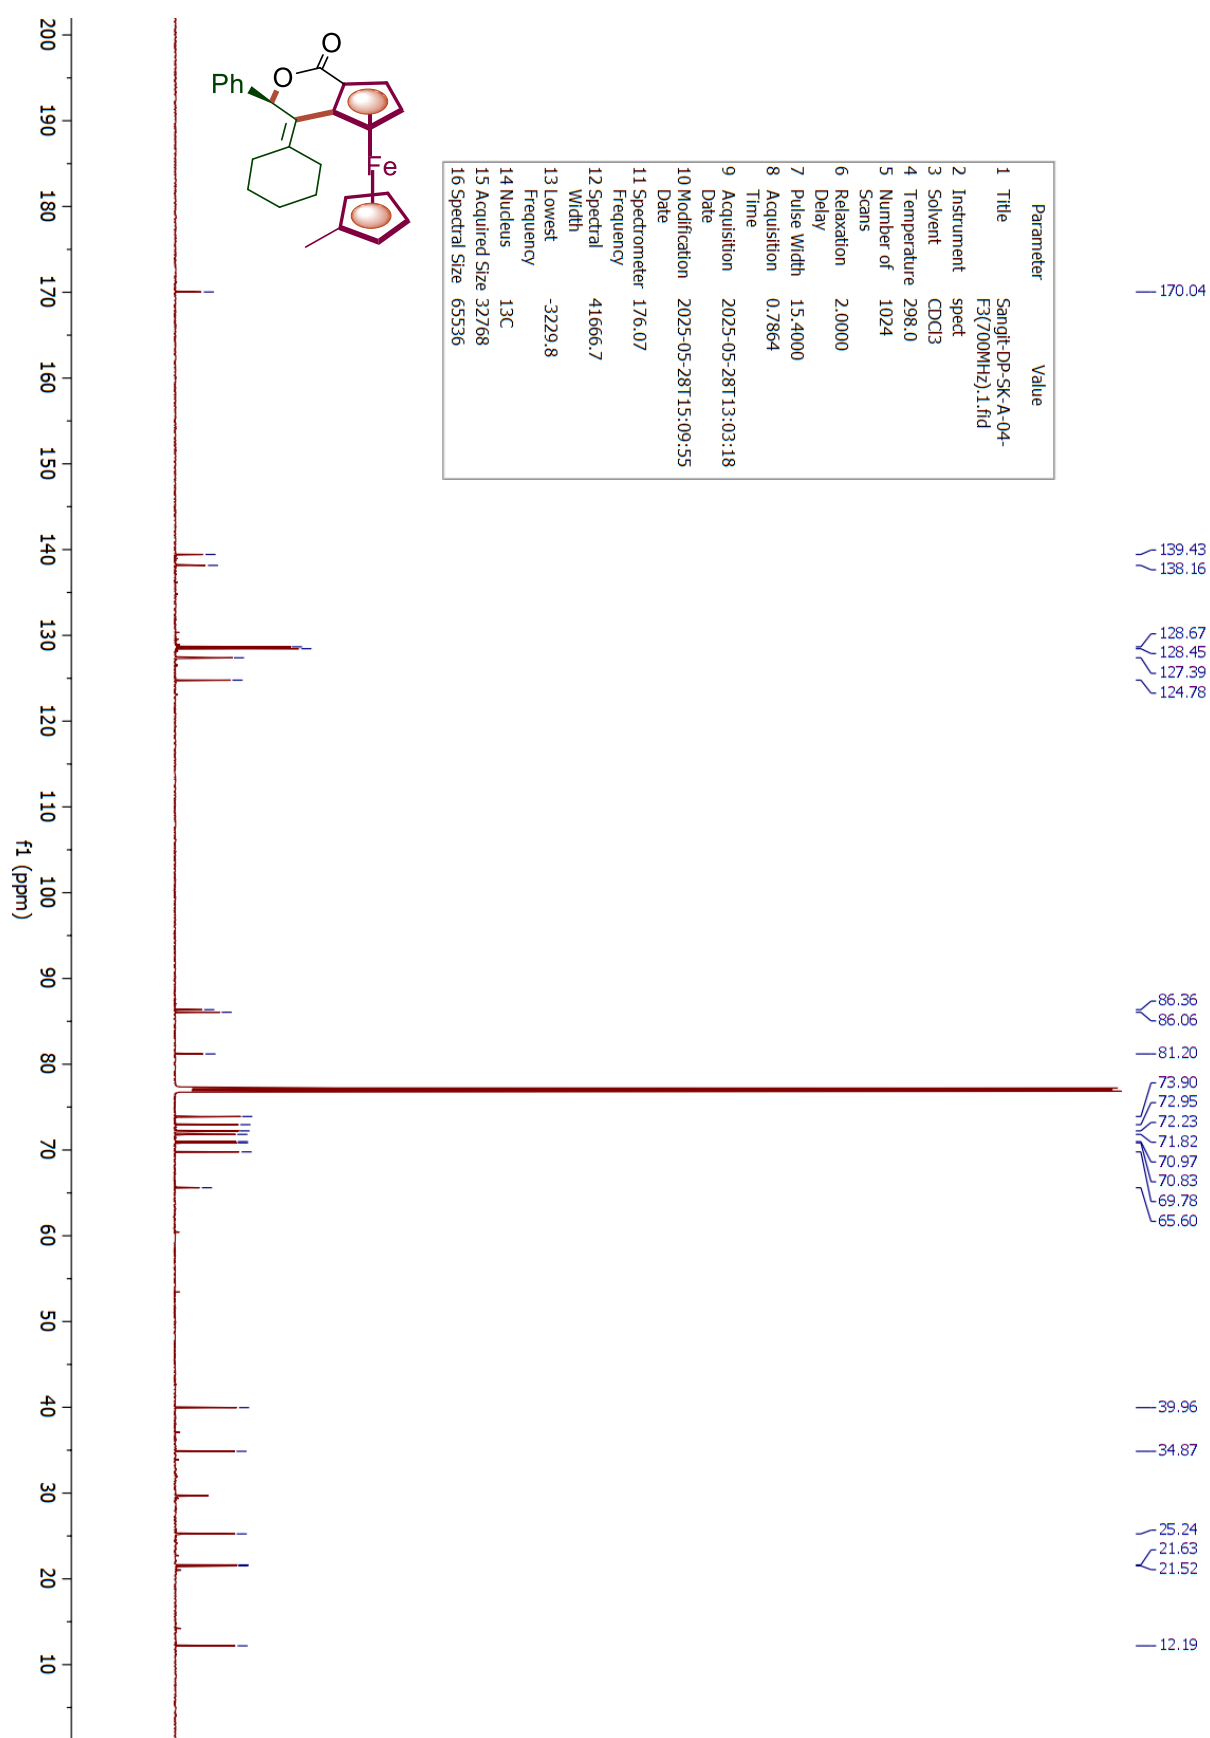

# <sup>1</sup>H NMR Spectrum of 3r

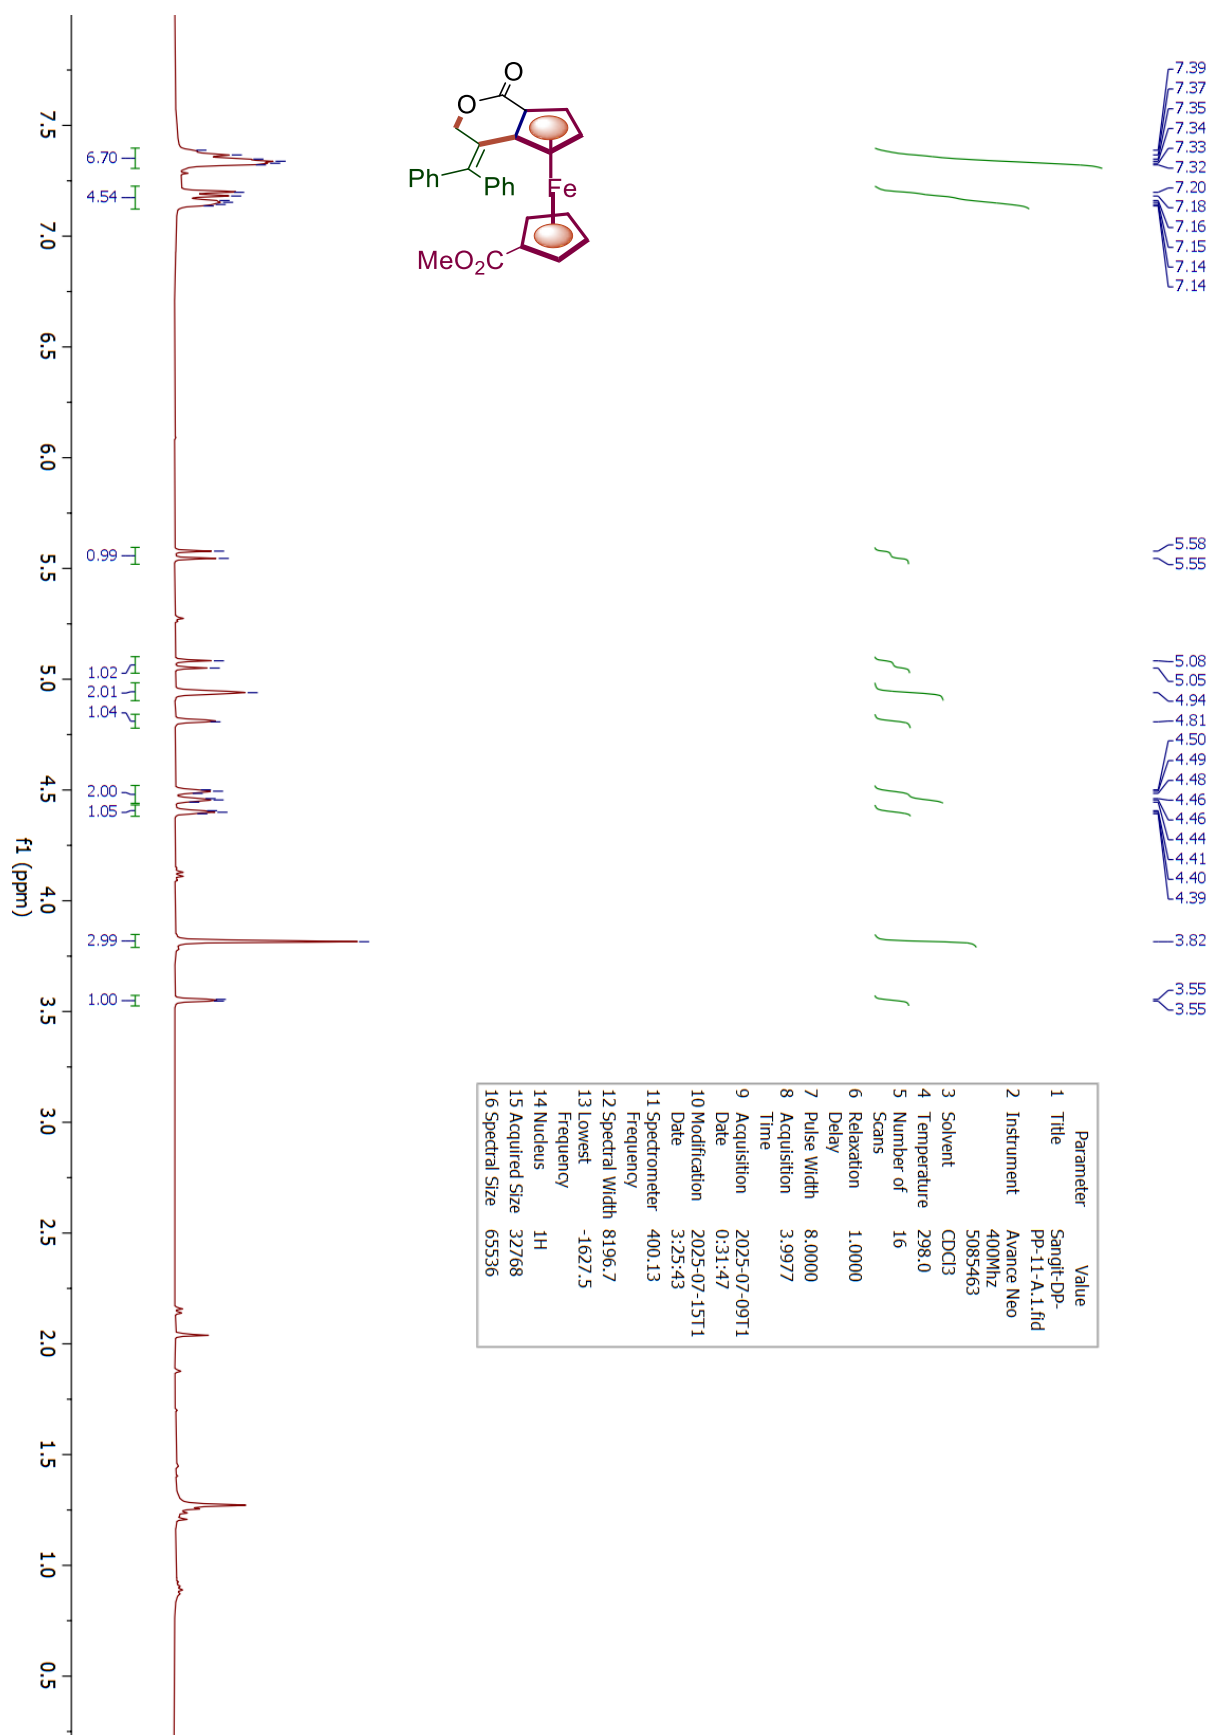

# $^{13}\text{C}\{^1\text{H}\}$ NMR Spectrum of 3r

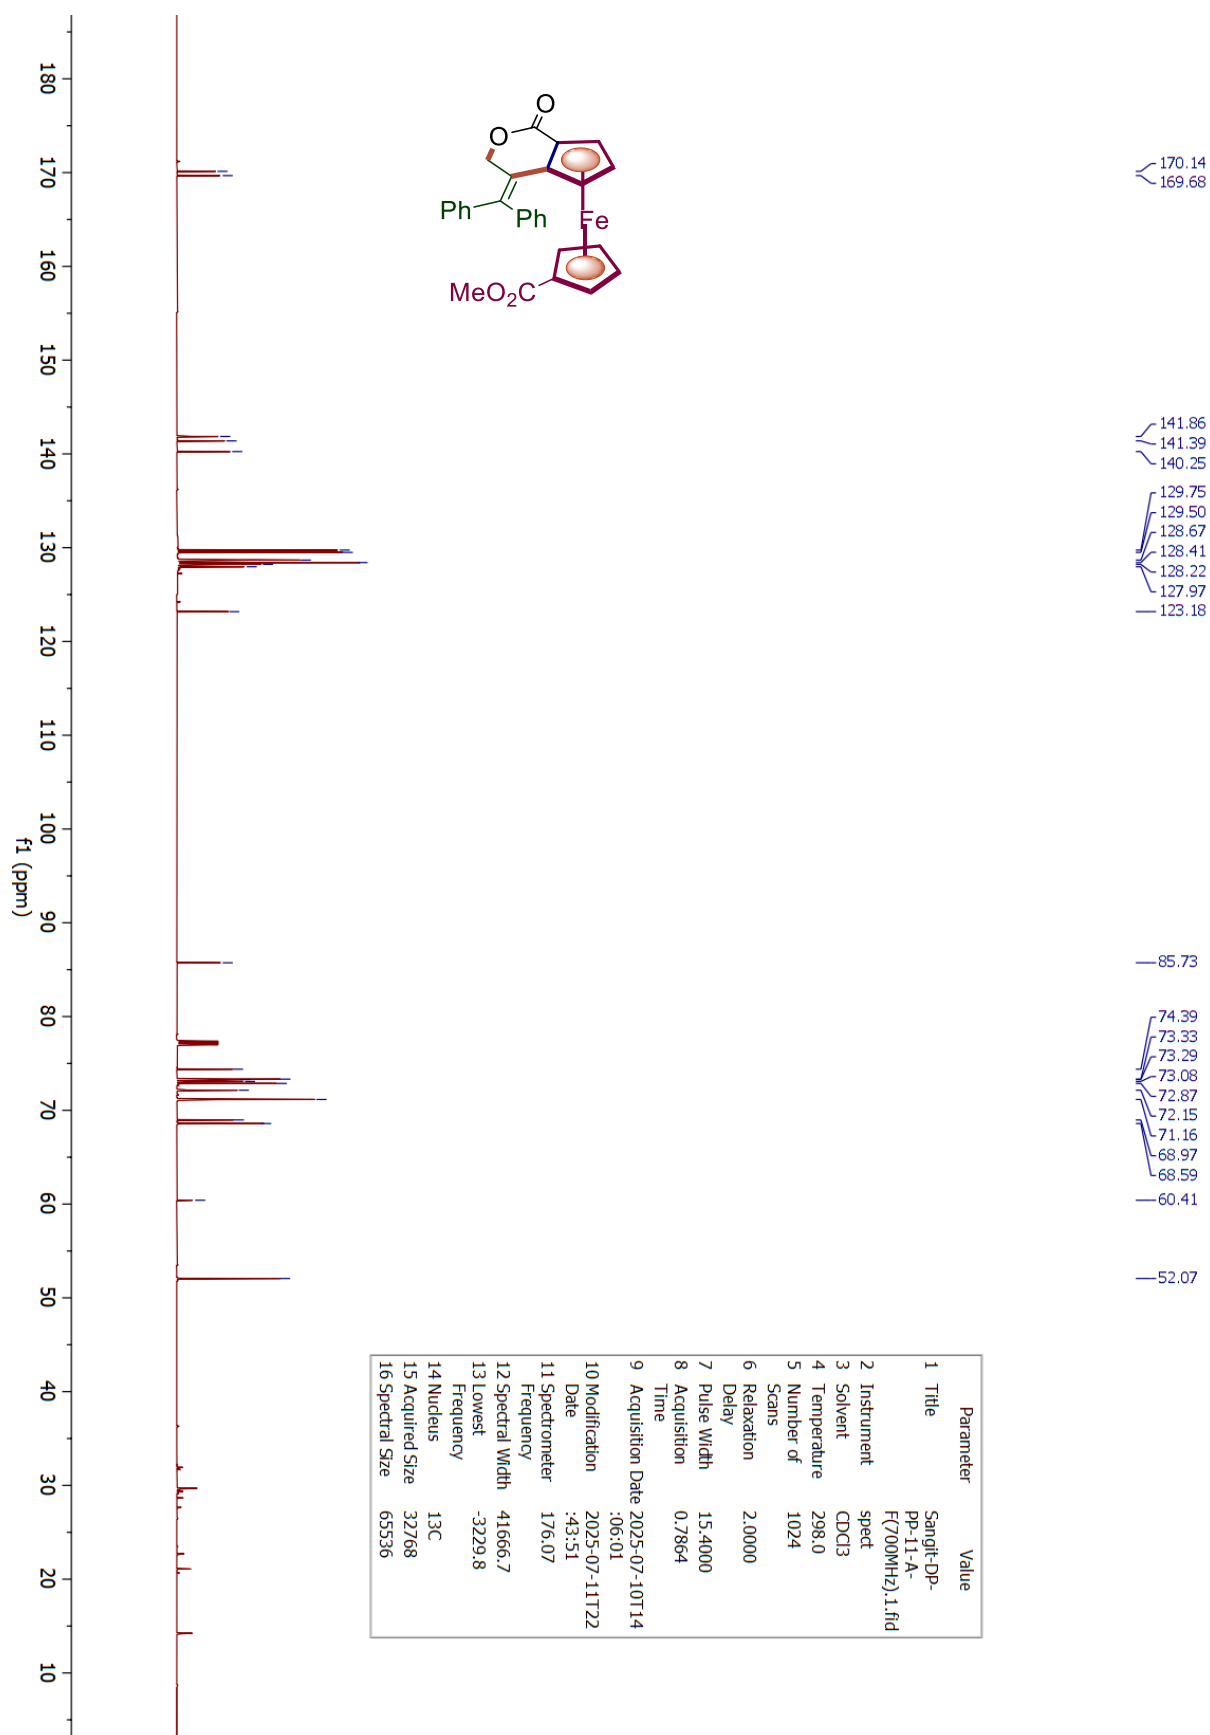

# <sup>1</sup>H NMR Spectrum of 3s

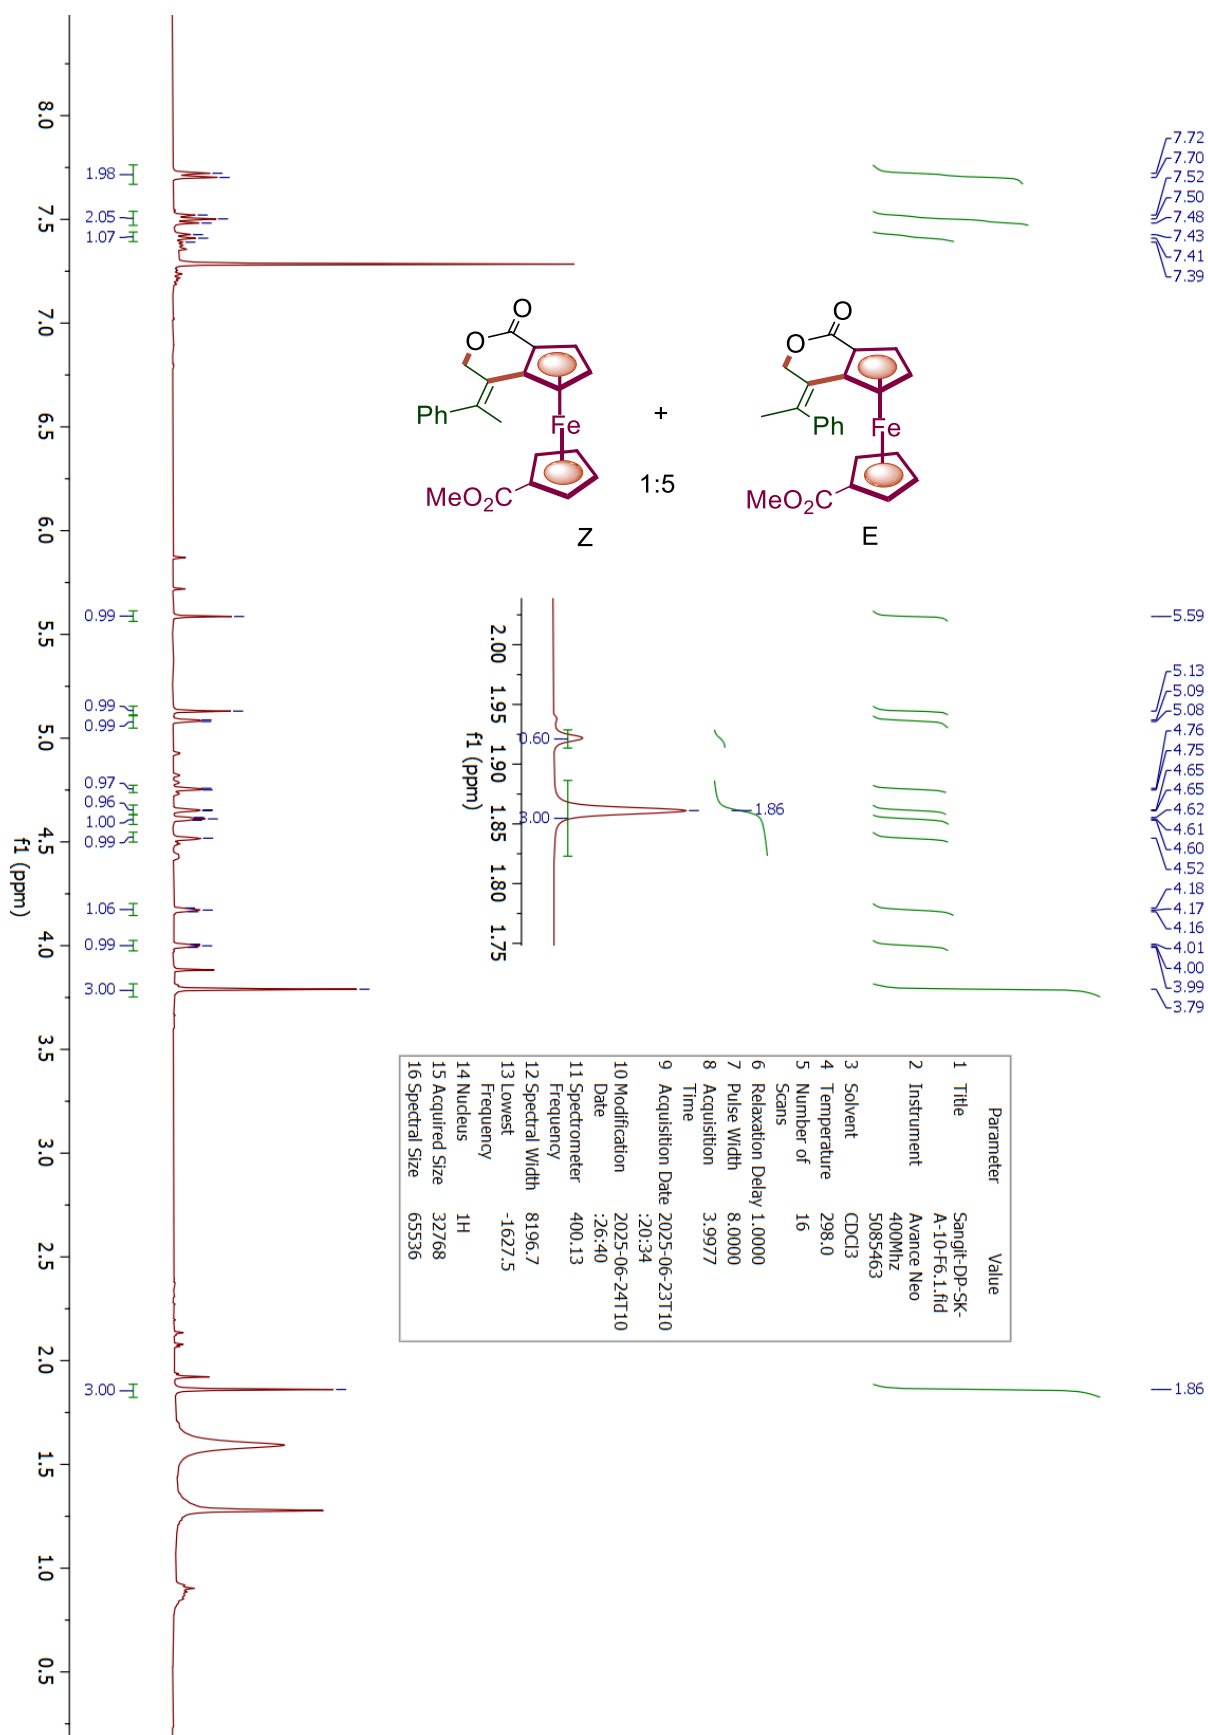

A mixture of E:Z regio-isomer were observed as 1:5 in the NMR spectra

# $^{13}\text{C}\{^1\text{H}\}$ NMR Spectrum of **3s**

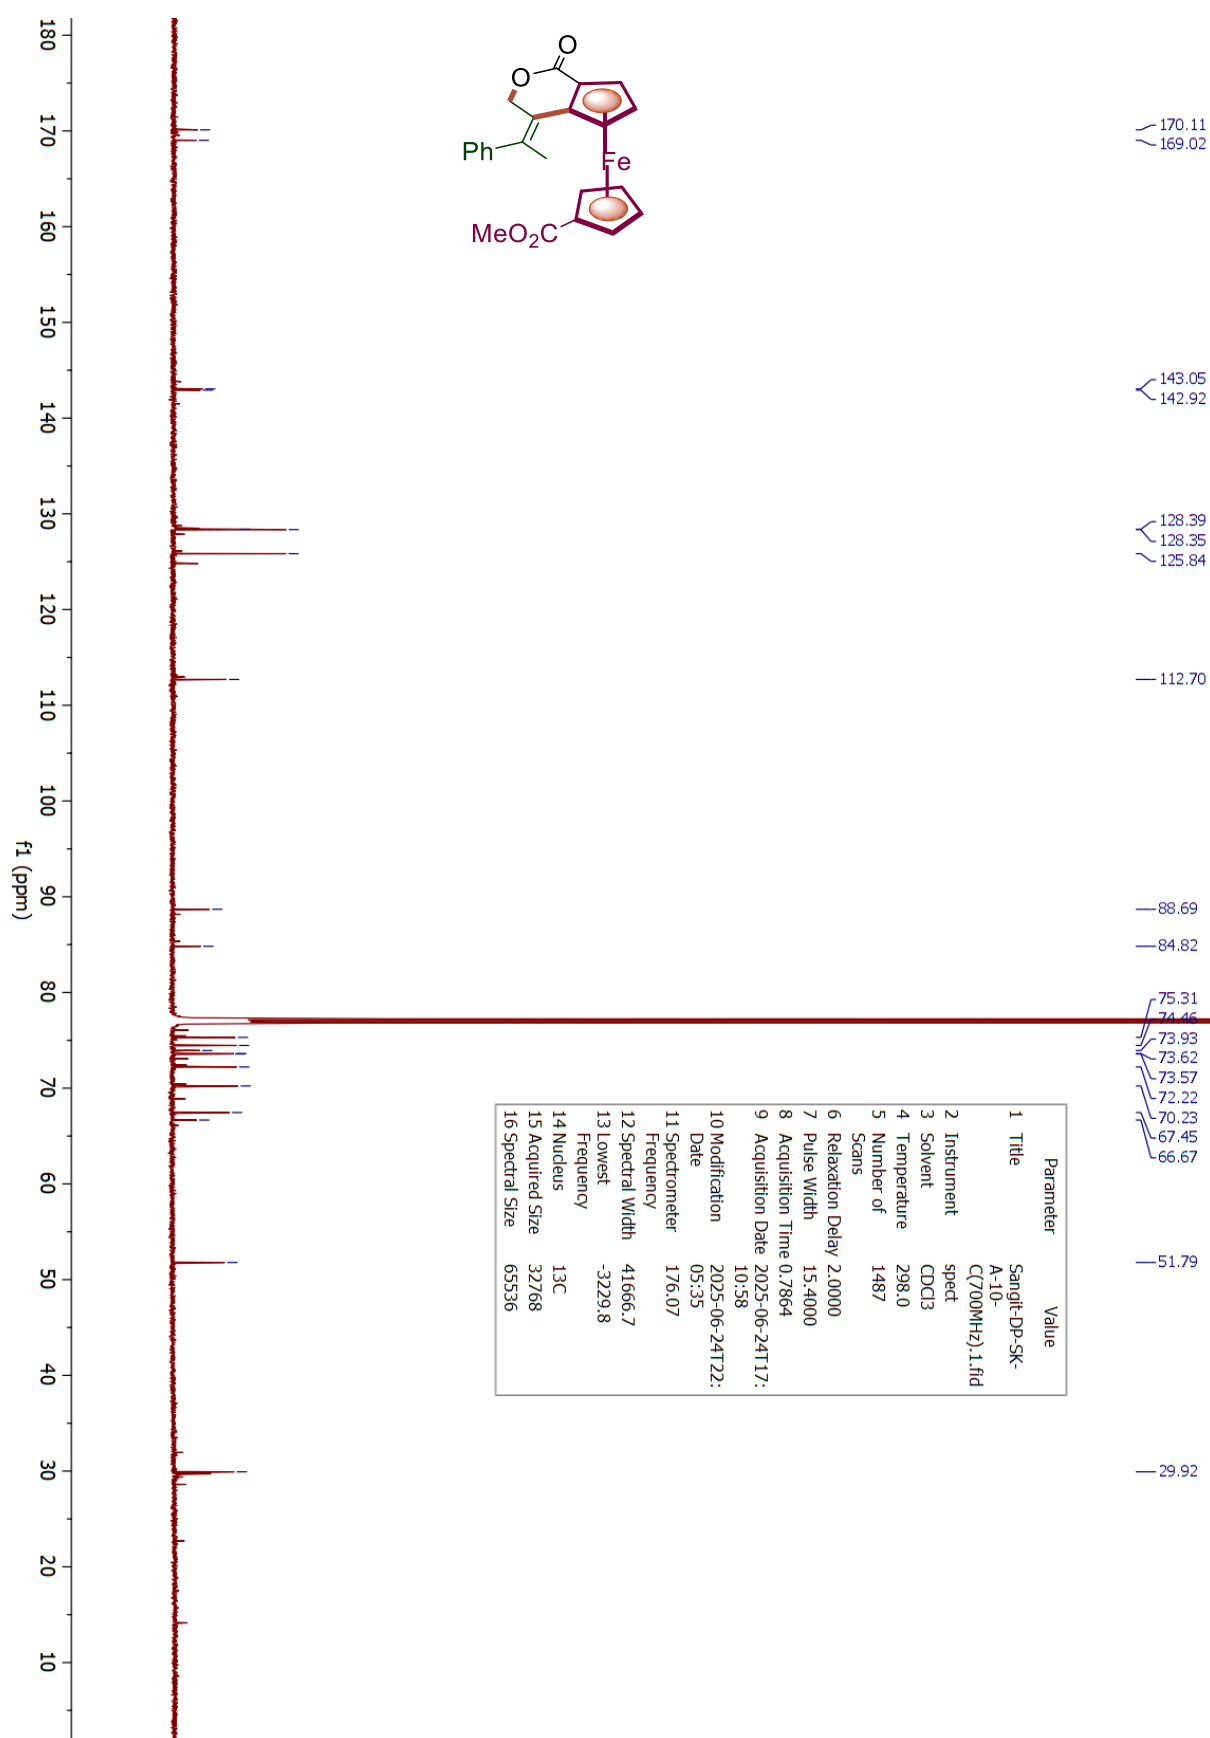



Chemical structure of the compound is shown above the spectrum. The structure is a biphenyl derivative with a methoxy group (MeO<sub>2</sub>C) and a naphthalene group (Nap) attached to the central carbon atom.

<sup>1</sup>H NMR spectrum (400 MHz, CDCl<sub>3</sub>) showing peaks in the aromatic region (7.39-7.92 ppm) and aliphatic region (2.39-4.74 ppm). Integration values are provided for each peak.

Peak list (ppm): 7.92, 7.88, 7.69, 7.56, 7.55, 7.54, 7.53, 7.41, 7.39, 5.23, 5.19, 5.08, 5.07, 4.97, 4.95, 4.95, 4.89, 4.86, 4.74, 4.74, 4.73, 4.60, 4.59, 4.58, 4.56, 4.55, 4.54, 3.82, 2.39.

Integration values: 3.09, 1.02, 2.02, 1.00, 1.00, 0.97, 2.05, 1.06, 0.98, 0.97, 0.99, 3.03, 3.01.

| Parameter            | Value                     |
|----------------------|---------------------------|
| 1 Title              | Sample-DP-PP-07A-1.1.fid  |
| 2 Instrument         | Avance Neo 400MHz 5085463 |
| 3 Solvent            | CDCl <sub>3</sub>         |
| 4 Temperature        | 298.0                     |
| 5 Number of Scans    | 16                        |
| 6 Relaxation Delay   | 1.0000                    |
| 7 Pulse Width        | 8.0000                    |
| 8 Acquisition Time   | 3.9977                    |
| 9 Acquisition Date   | 2025-06-23T14:58:14       |
| 10 Modification Date | 2025-06-24T09:48:19       |
| 11 Spectrometer      | 400.13                    |
| 12 Frequency         | 8196.7                    |
| 13 Spectral Width    | 8196.7                    |
| 14 Lowest Frequency  | -1627.5                   |
| 15 Nucleus           | <sup>1</sup> H            |
| 16 Acquired Size     | 32768                     |
| 17 Spectral Size     | 65536                     |

# $^{13}\text{C}\{^1\text{H}\}$ NMR Spectrum of 3t

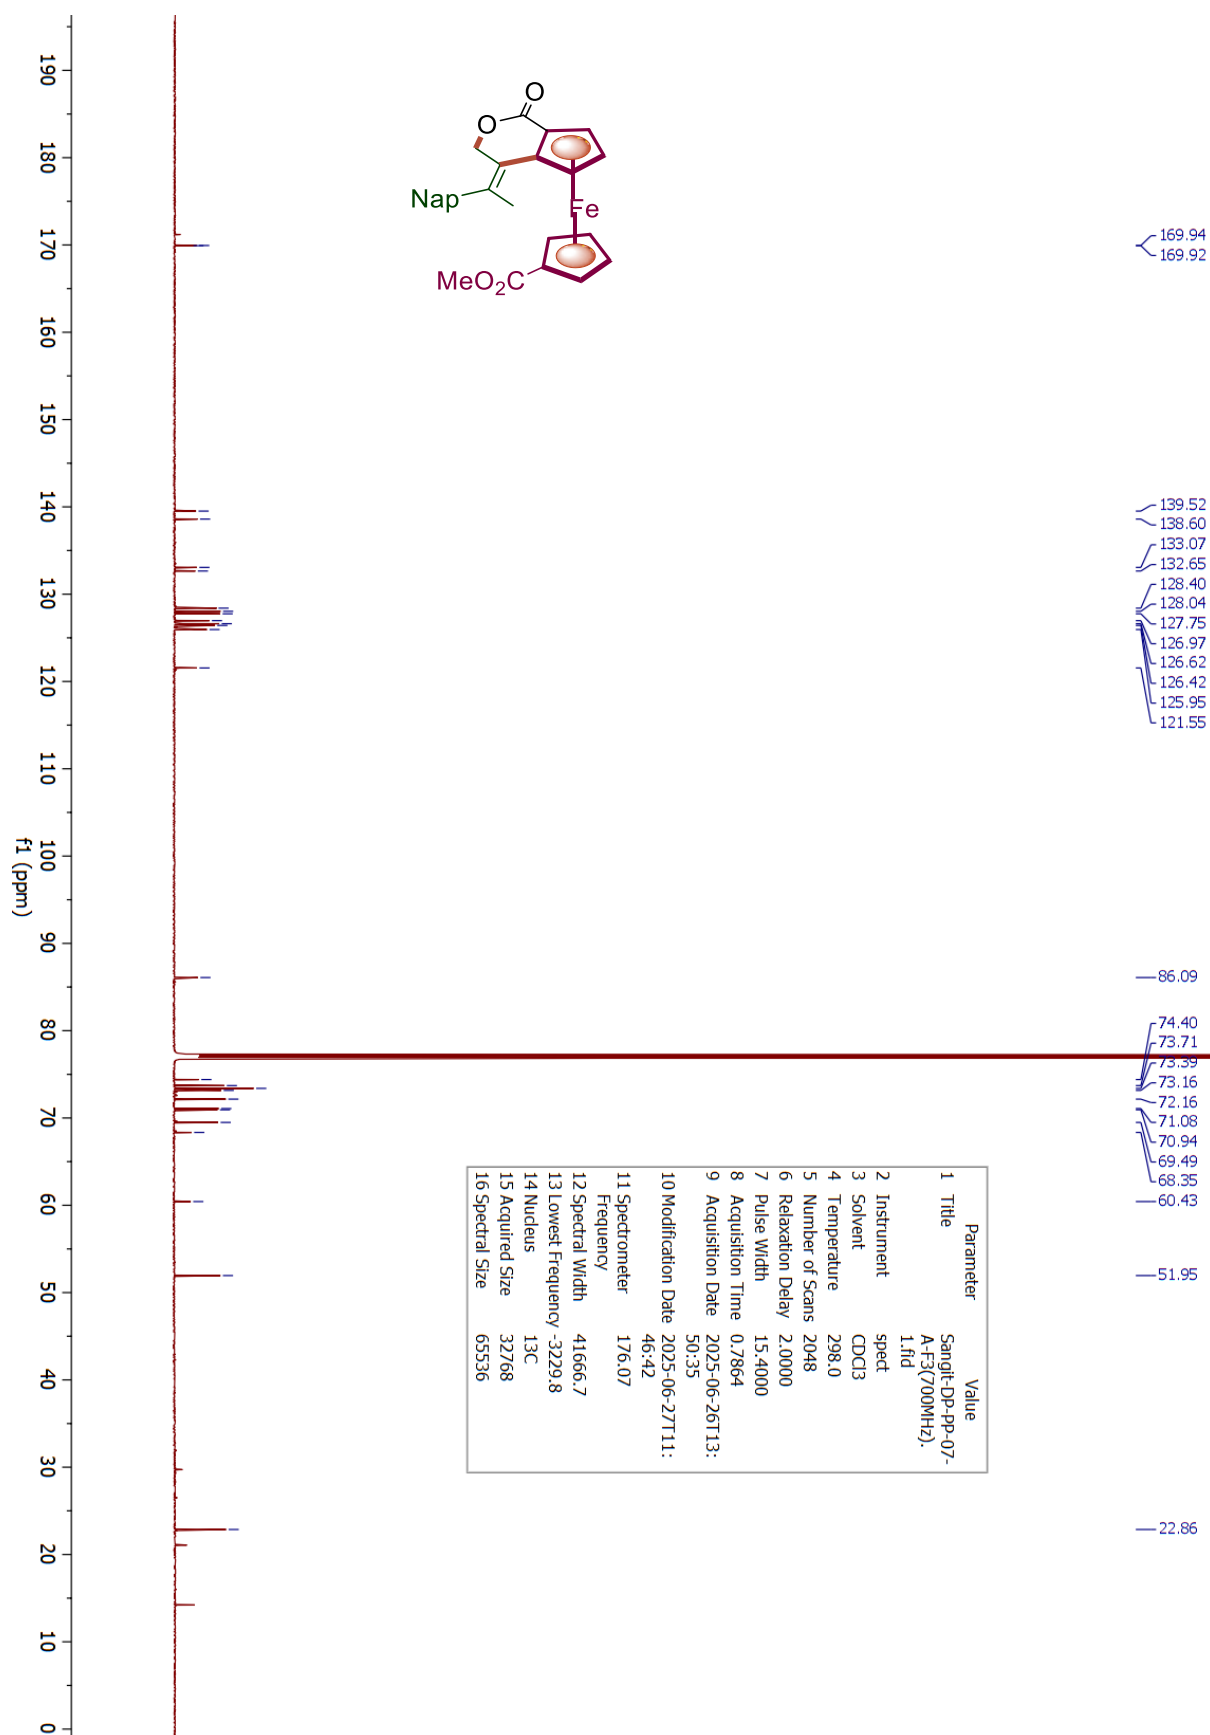

# <sup>1</sup>H NMR Spectrum of 3u

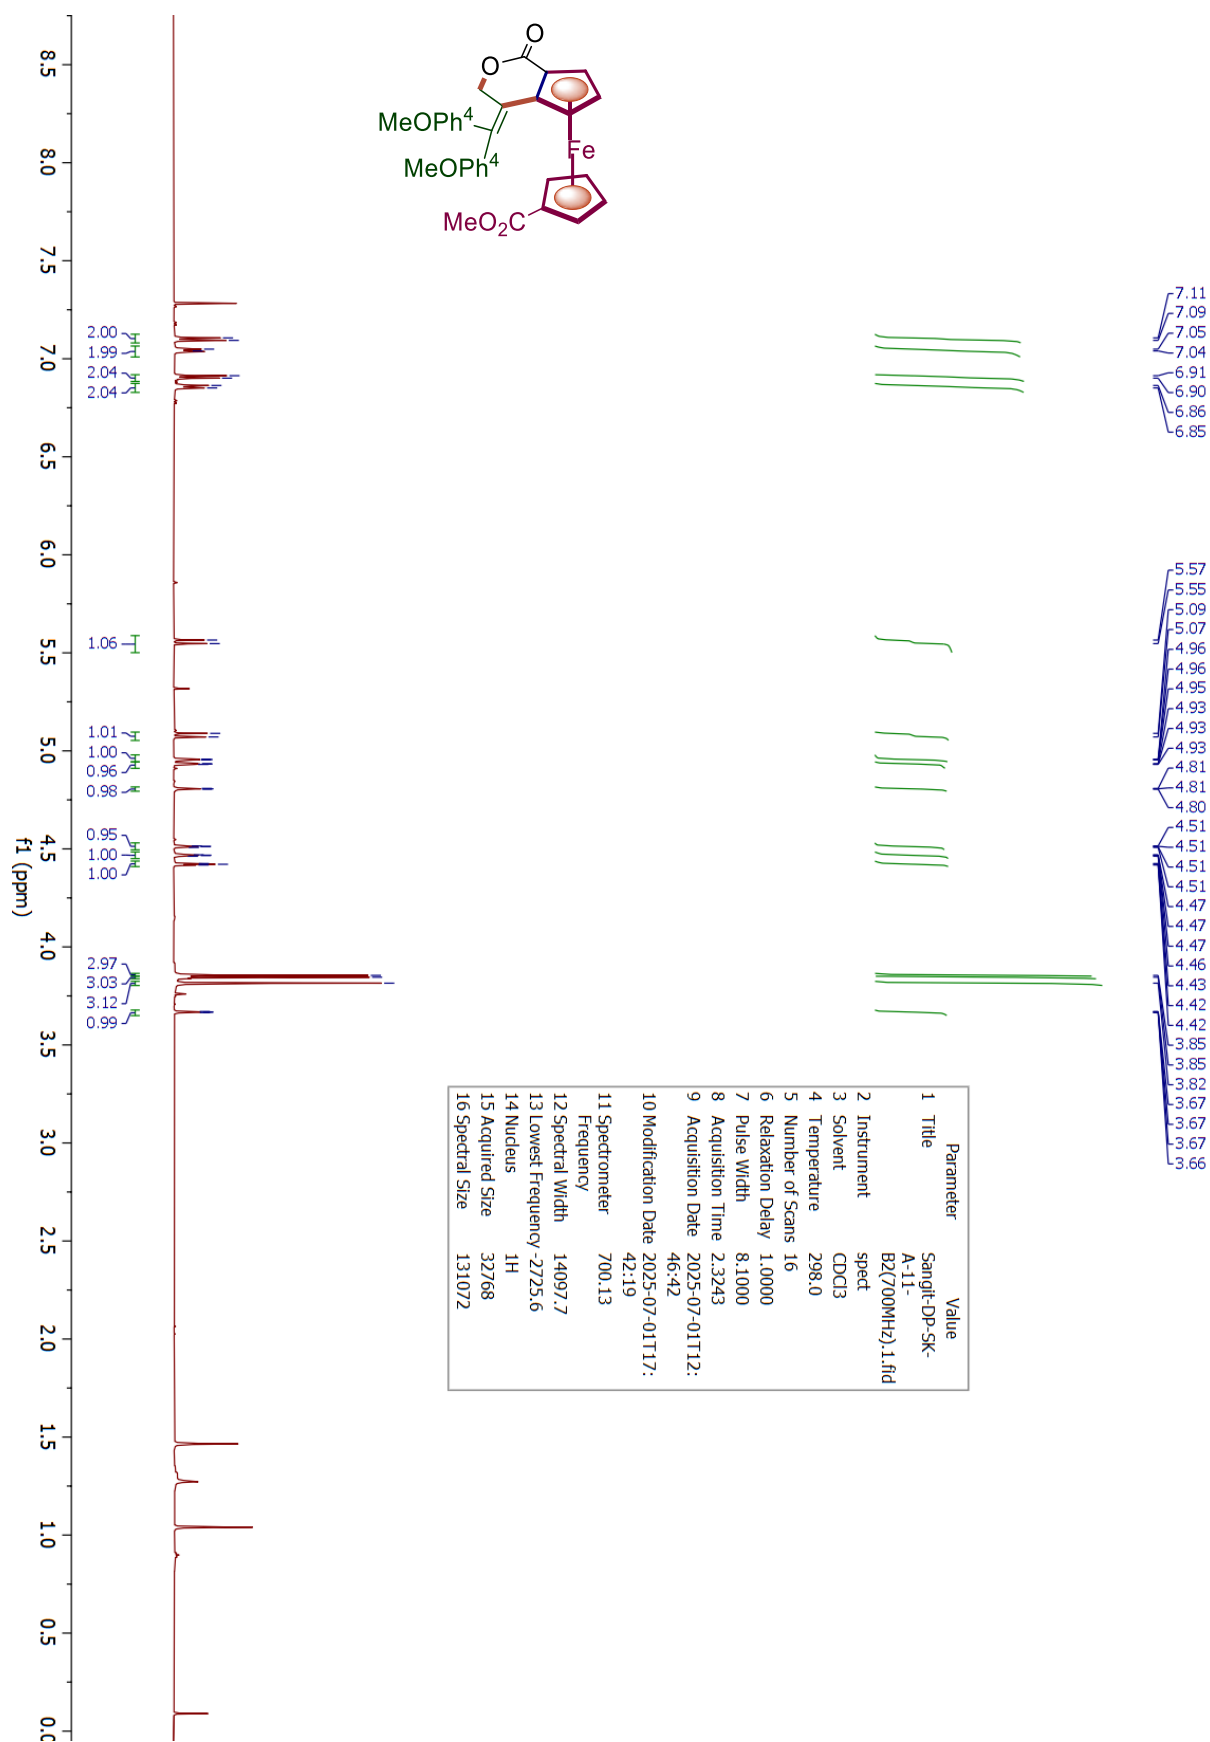

# $^{13}\text{C}\{^1\text{H}\}$ NMR Spectrum of **3u**

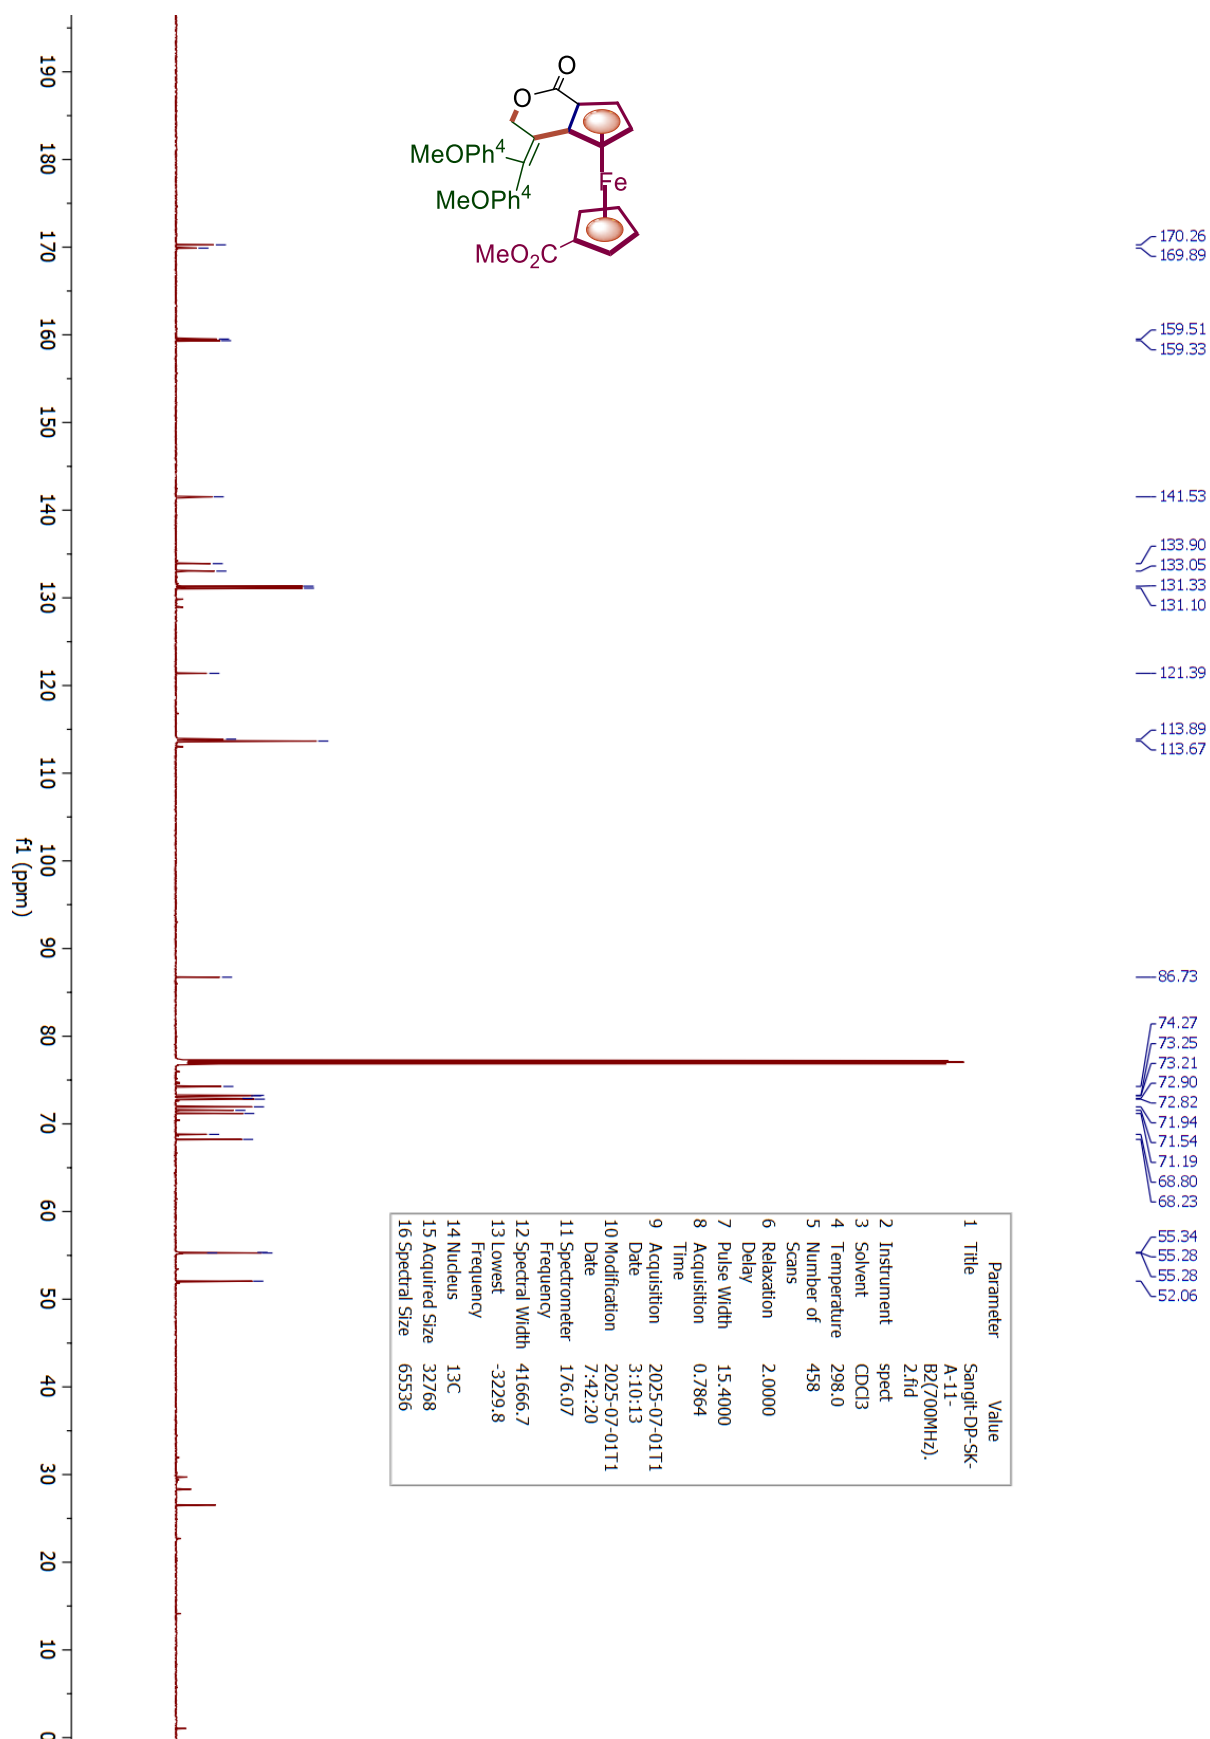

# <sup>1</sup>H NMR Spectrum of 3v

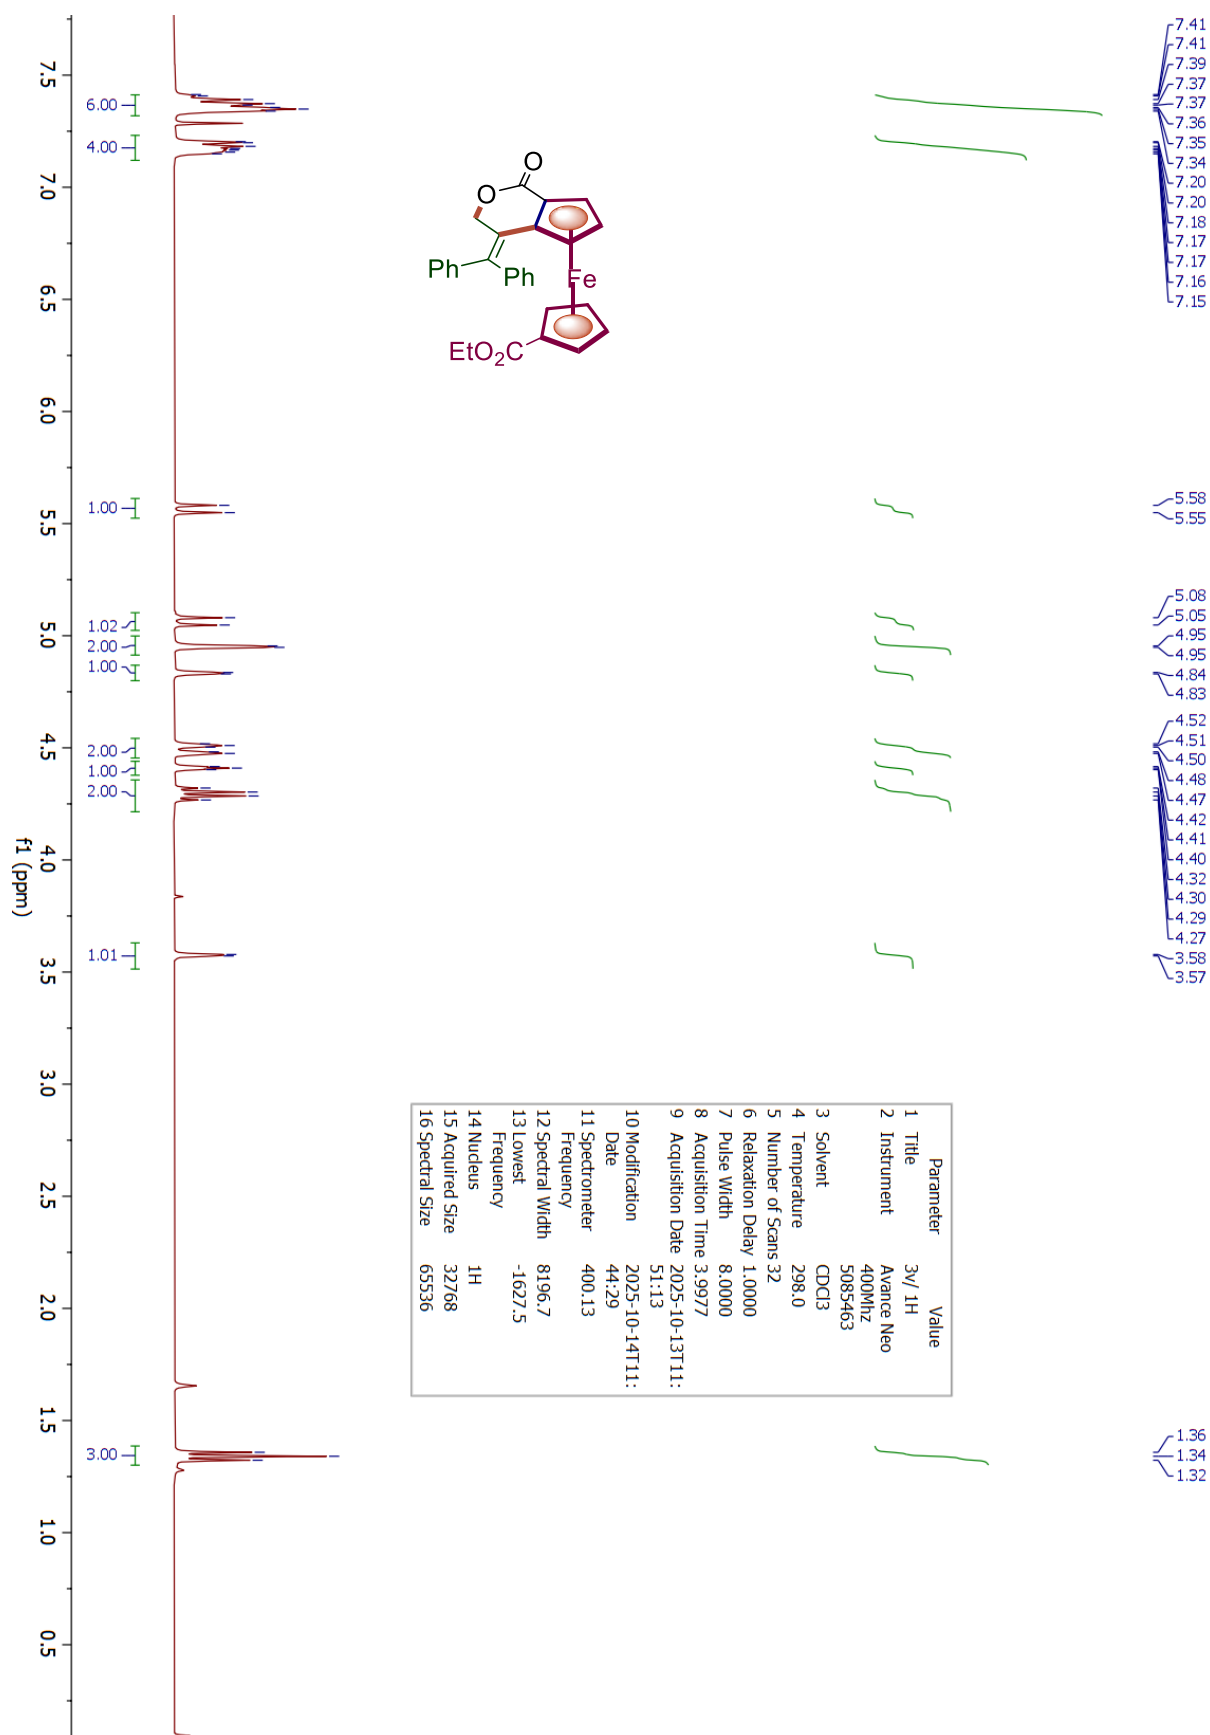

# <sup>13</sup>C{<sup>1</sup>H} NMR Spectrum of 3v

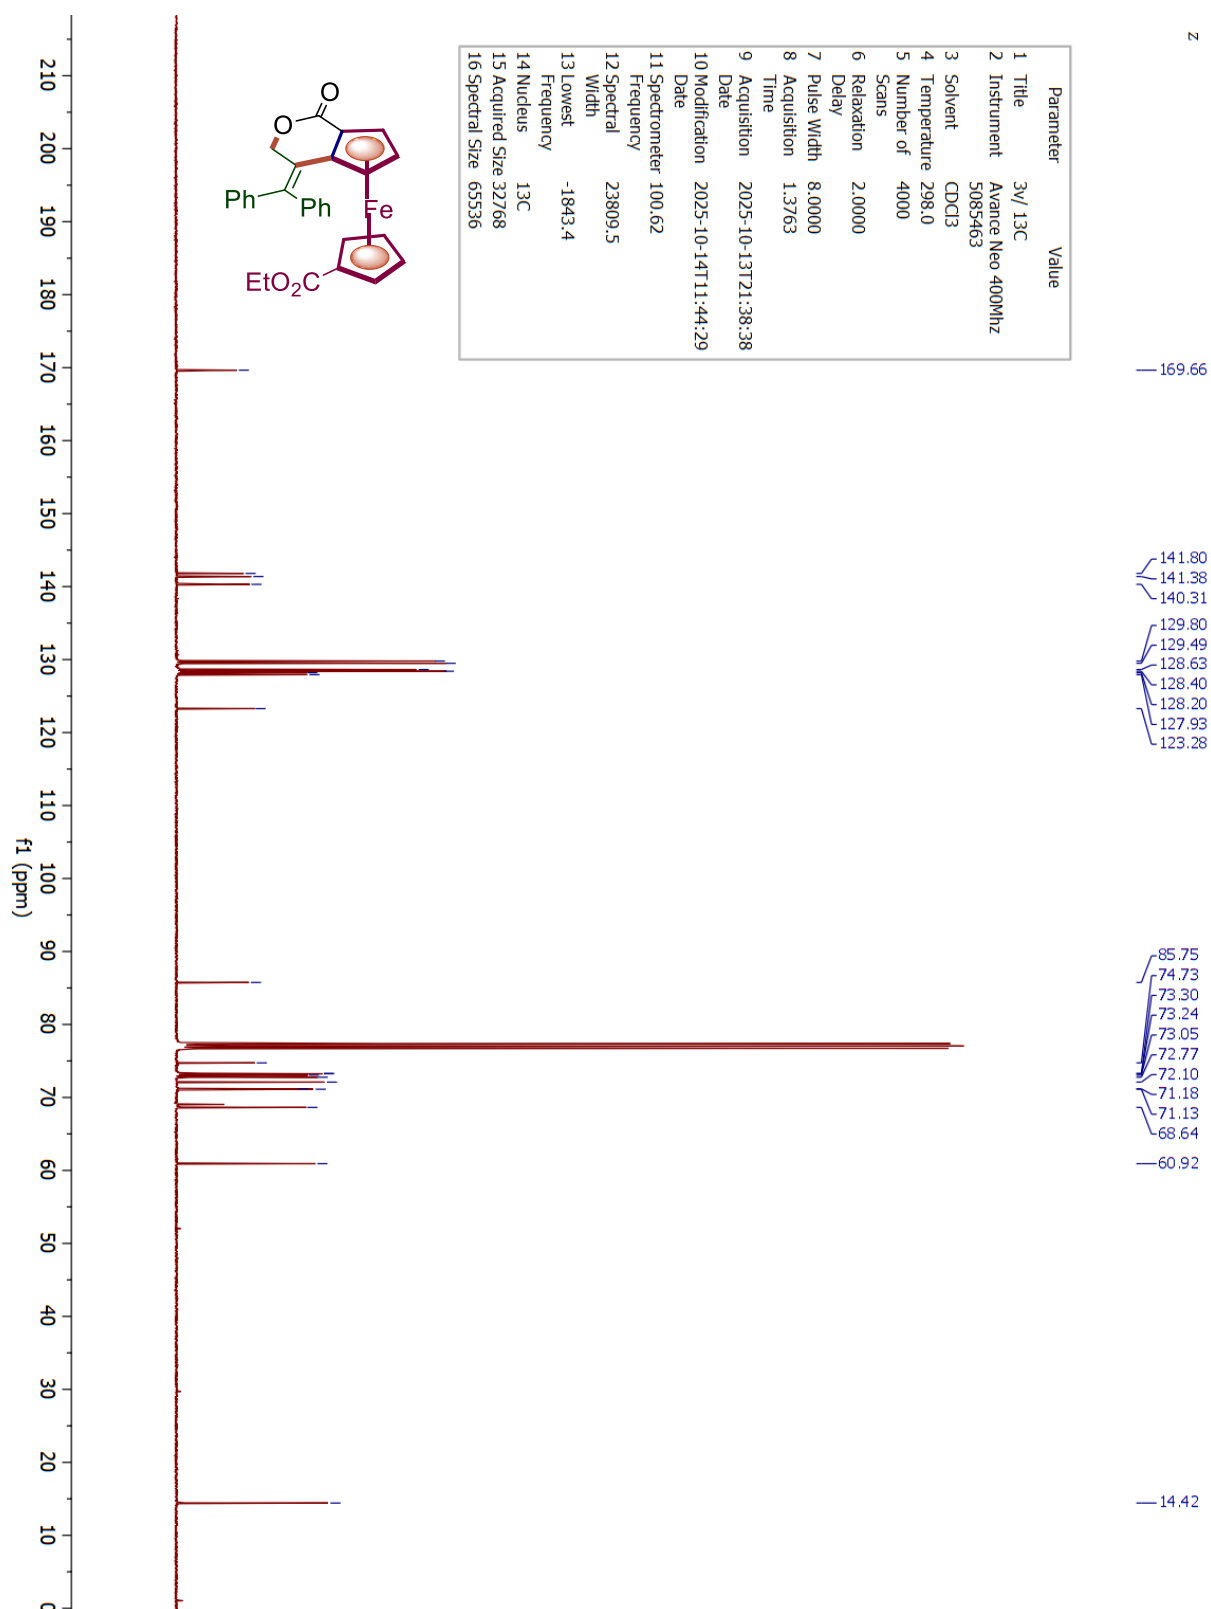

# <sup>1</sup>H NMR Spectrum of 4

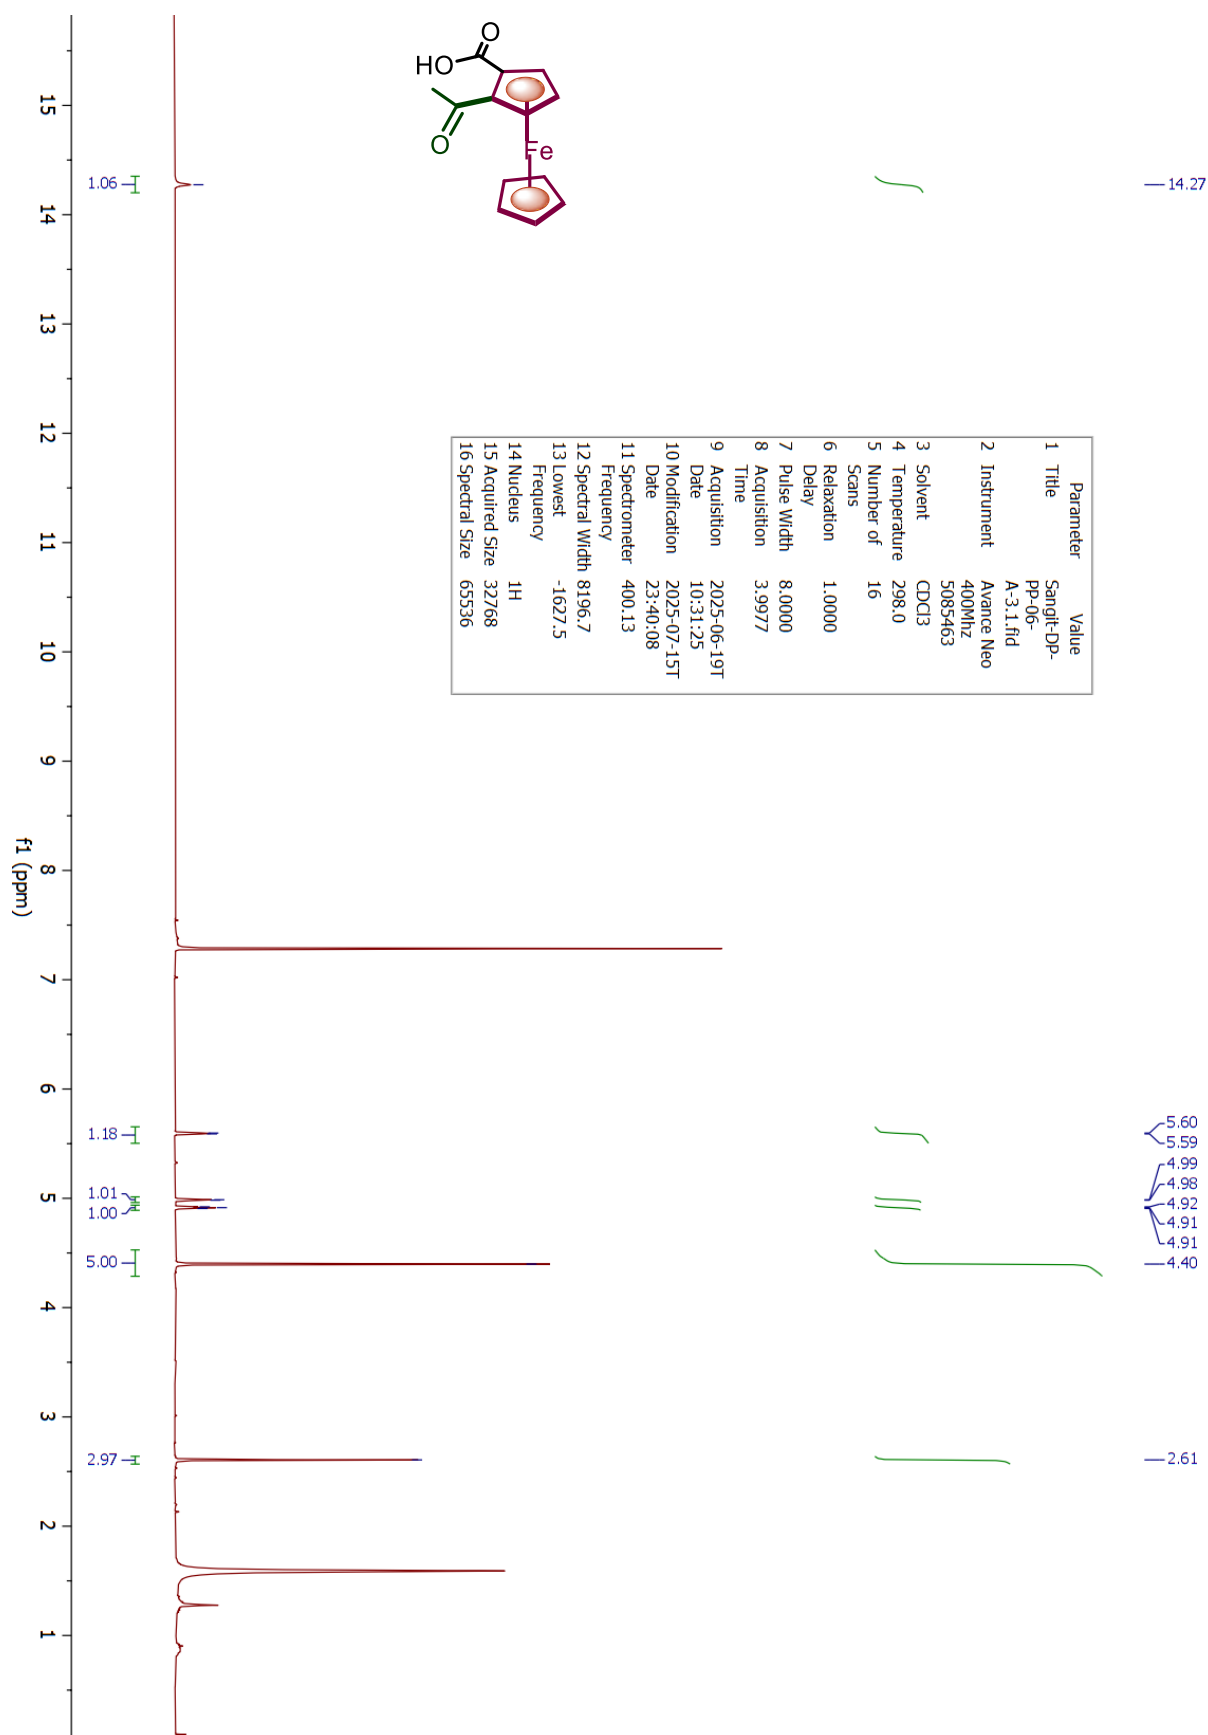

# $^{13}\text{C}\{^1\text{H}\}$ NMR Spectrum of 4

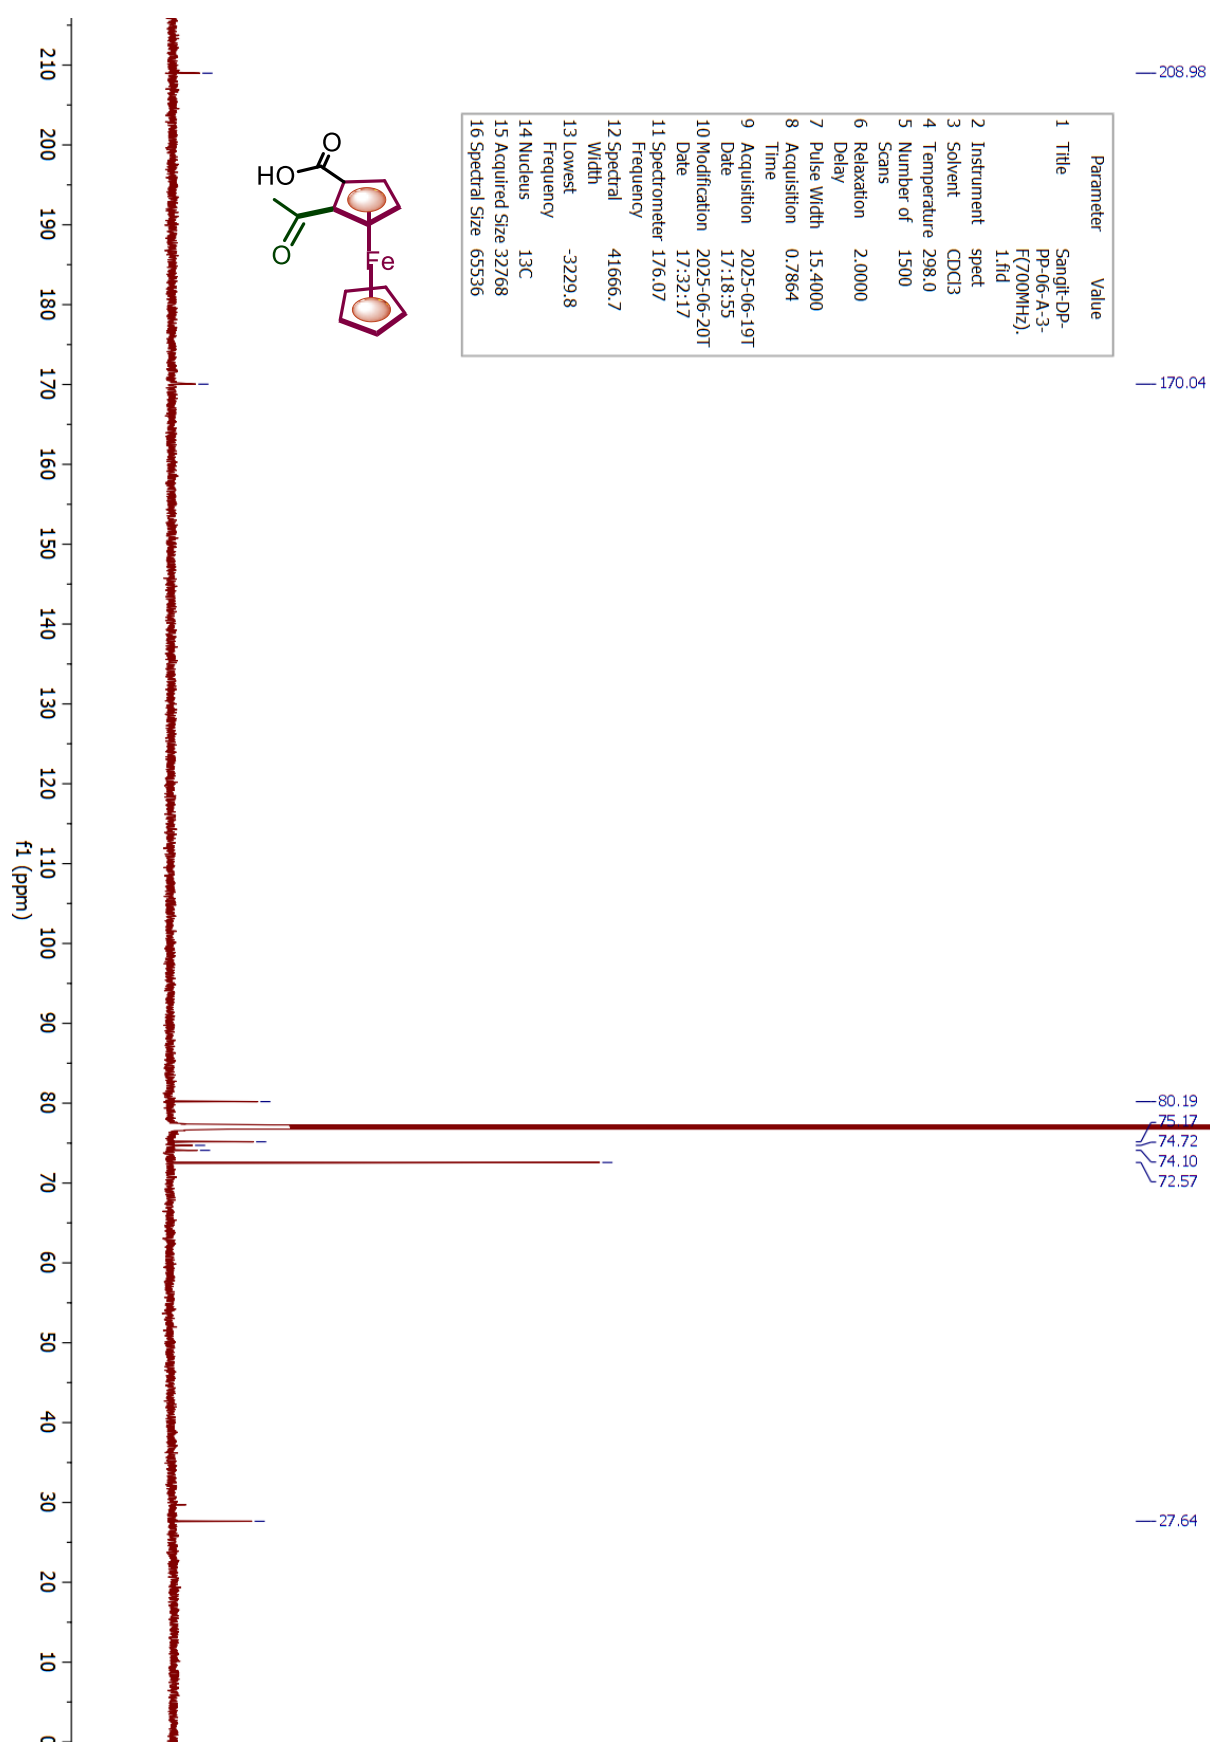



# HRMS analysis of the reaction mixture of the synthesis of 1,2-keto ferrocene acid 4

## Custom Workflow Report

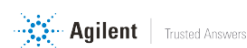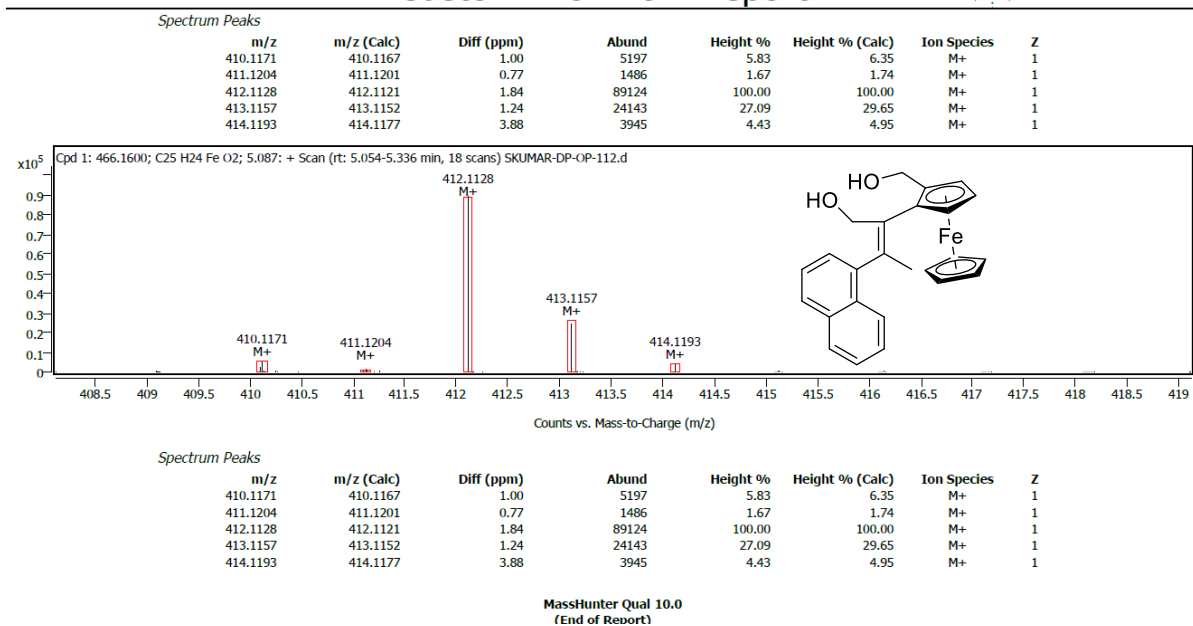

## Custom Workflow Report

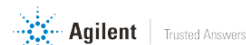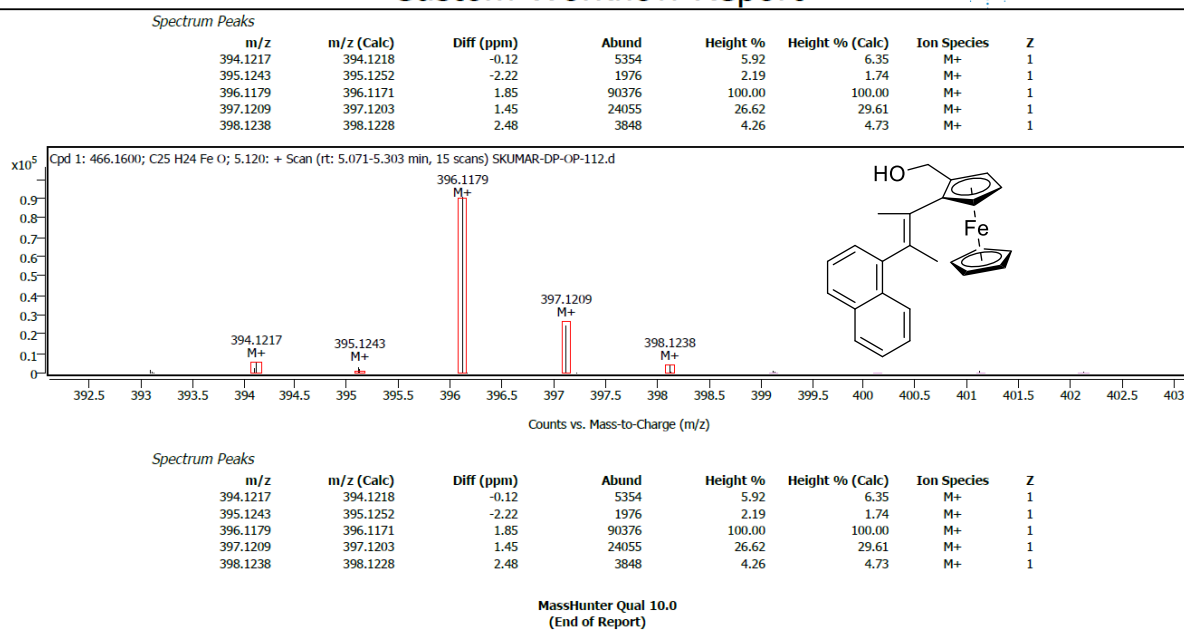

# Custom Workflow Report

## Spectrum Peaks

| m/z      | m/z (Calc) | Diff (ppm) | Abund | Height % | Height % (Calc) | Ion Species | Z |
|----------|------------|------------|-------|----------|-----------------|-------------|---|
| 408.0977 | 408.1010   | -8.21      | 123   | 2.37     | 6.35            | M+          | 1 |
| 409.1019 | 409.1044   | -6.28      | 128   | 2.46     | 1.74            | M+          | 1 |
| 409.1074 | 409.1089   | -3.49      | 1545  | 7.70     | 6.35            | (M+H)+      | 1 |
| 410.0943 | 410.0964   | -5.06      | 5177  | 100.00   | 100.00          | M+          | 1 |
| 410.1099 | 410.1123   | -5.84      | 57    | 0.28     | 1.74            | (M+H)+      | 1 |
| 411.1046 | 411.1042   | 0.87       | 20067 | 100.00   | 100.00          | (M+H)+      | 1 |

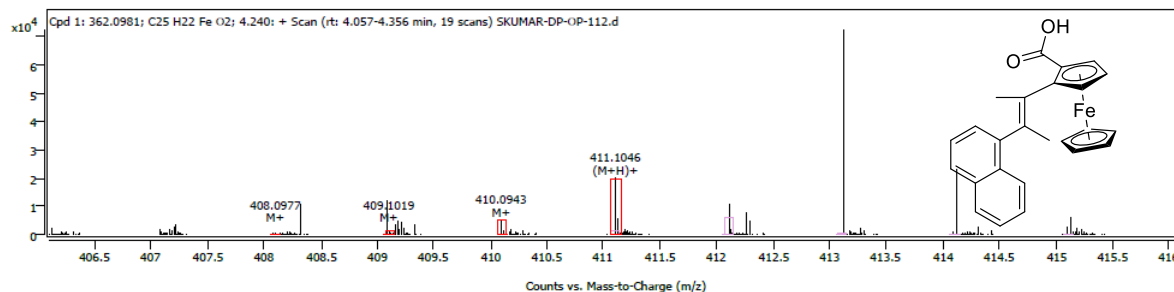

## Spectrum Peaks

| m/z      | m/z (Calc) | Diff (ppm) | Abund | Height % | Height % (Calc) | Ion Species | Z |
|----------|------------|------------|-------|----------|-----------------|-------------|---|
| 408.0977 | 408.1010   | -8.21      | 123   | 2.37     | 6.35            | M+          | 1 |
| 409.1019 | 409.1044   | -6.28      | 128   | 2.46     | 1.74            | M+          | 1 |
| 409.1074 | 409.1089   | -3.49      | 1545  | 7.70     | 6.35            | (M+H)+      | 1 |
| 410.0943 | 410.0964   | -5.06      | 5177  | 100.00   | 100.00          | M+          | 1 |
| 410.1099 | 410.1123   | -5.84      | 57    | 0.28     | 1.74            | (M+H)+      | 1 |
| 411.1046 | 411.1042   | 0.87       | 20067 | 100.00   | 100.00          | (M+H)+      | 1 |

MassHunter Qual 10.0  
(End of Report)

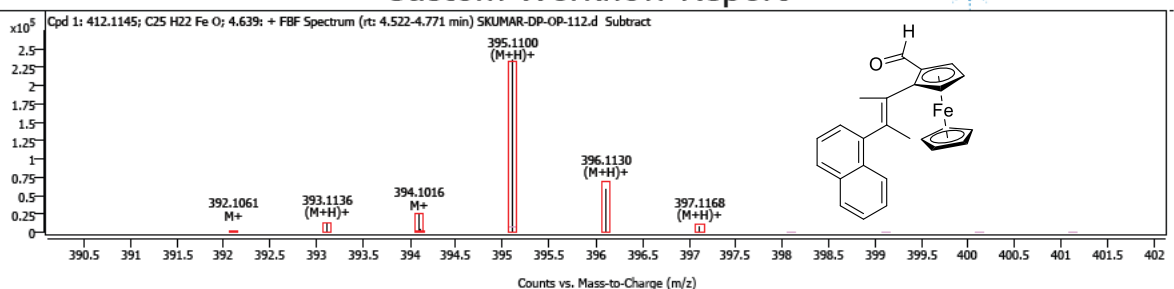

## Spectrum Peaks

| m/z      | m/z (Calc) | Diff (ppm) | Abund  | Height % | Height % (Calc) | Ion Species | Z |
|----------|------------|------------|--------|----------|-----------------|-------------|---|
| 392.1061 | 392.1061   | -0.05      | 1980   | 8.07     | 6.35            | M+          | 1 |
| 393.1136 | 393.1140   | -0.87      | 12484  | 5.34     | 6.35            | (M+H)+      | 1 |
| 394.1016 | 394.1015   | 0.19       | 24550  | 100.00   | 100.00          | M+          | 1 |
| 394.1159 | 394.1173   | -3.70      | 3628   | 1.55     | 1.74            | (M+H)+      | 1 |
| 395.1100 | 395.1093   | 1.64       | 233643 | 100.00   | 100.00          | (M+H)+      | 1 |
| 396.1130 | 396.1124   | 1.43       | 58770  | 25.15    | 29.60           | (M+H)+      | 1 |
| 397.1168 | 397.1150   | 4.57       | 7439   | 3.18     | 4.73            | (M+H)+      | 1 |

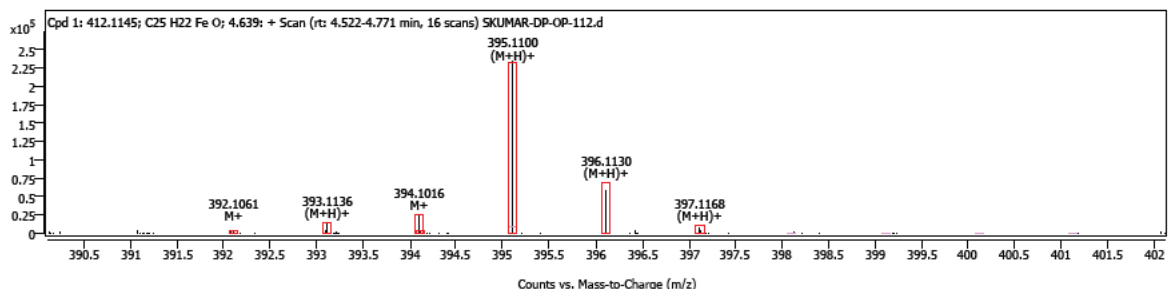

## Spectrum Peaks

| m/z      | m/z (Calc) | Diff (ppm) | Abund  | Height % | Height % (Calc) | Ion Species | Z |
|----------|------------|------------|--------|----------|-----------------|-------------|---|
| 392.1061 | 392.1061   | -0.05      | 1980   | 8.07     | 6.35            | M+          | 1 |
| 393.1136 | 393.1140   | -0.87      | 12484  | 5.34     | 6.35            | (M+H)+      | 1 |
| 394.1016 | 394.1015   | 0.19       | 24550  | 100.00   | 100.00          | M+          | 1 |
| 394.1159 | 394.1173   | -3.70      | 3628   | 1.55     | 1.74            | (M+H)+      | 1 |
| 395.1100 | 395.1093   | 1.64       | 233643 | 100.00   | 100.00          | (M+H)+      | 1 |
| 396.1130 | 396.1124   | 1.43       | 58770  | 25.15    | 29.60           | (M+H)+      | 1 |
| 397.1168 | 397.1150   | 4.57       | 7439   | 3.18     | 4.73            | (M+H)+      | 1 |

MassHunter Qual 10.0  
(End of Report)

# Custom Workflow Report

## Spectrum Peaks

| m/z      | m/z (Calc) | Diff (ppm) | Abund | Height % | Height % (Calc) | Ion Species | Z |
|----------|------------|------------|-------|----------|-----------------|-------------|---|
| 443.1113 | 443.1144   | -6.80      | 70    | 9.10     | 6.35            | (M+H)+      | 1 |
| 444.1028 | 444.1019   | 2.11       | 430   | 100.00   | 100.00          | M+          | 1 |
| 445.1035 | 445.1050   | -3.44      | 209   | 48.58    | 29.73           | M+          | 1 |
| 445.1094 | 445.1097   | -0.70      | 771   | 100.00   | 100.00          | (M+H)+      | 1 |

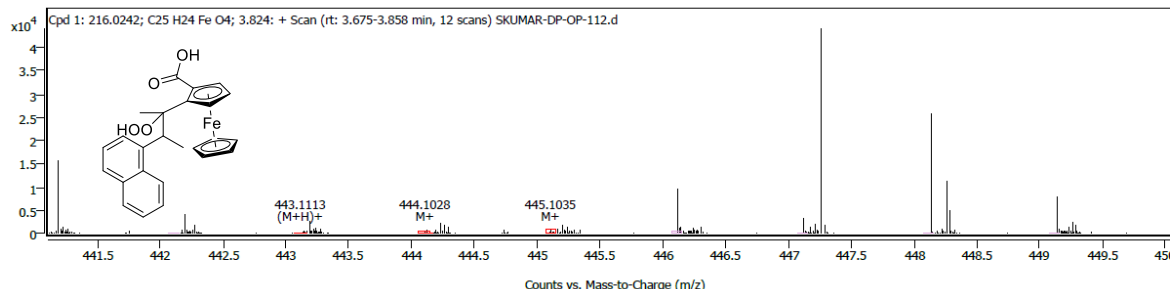

## Spectrum Peaks

| m/z      | m/z (Calc) | Diff (ppm) | Abund | Height % | Height % (Calc) | Ion Species | Z |
|----------|------------|------------|-------|----------|-----------------|-------------|---|
| 443.1113 | 443.1144   | -6.80      | 70    | 9.10     | 6.35            | (M+H)+      | 1 |
| 444.1028 | 444.1019   | 2.11       | 430   | 100.00   | 100.00          | M+          | 1 |
| 445.1035 | 445.1050   | -3.44      | 209   | 48.58    | 29.73           | M+          | 1 |
| 445.1094 | 445.1097   | -0.70      | 771   | 100.00   | 100.00          | (M+H)+      | 1 |

MassHunter Qual 10.0  
(End of Report)

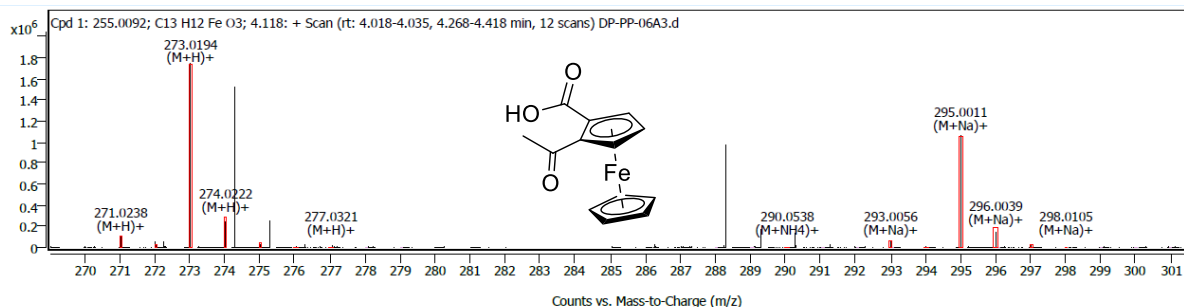

## Spectrum Peaks

| m/z      | m/z (Calc) | Diff (ppm) | Abund   | Height % | Height % (Calc) | Ion Species | Z |
|----------|------------|------------|---------|----------|-----------------|-------------|---|
| 271.0238 | 271.0255   | -6.46      | 93224   | 5.34     | 6.36            | (M+H)+      | 1 |
| 272.0267 | 272.0289   | -8.21      | 16210   | 0.93     | 0.91            | (M+H)+      | 1 |
| 273.0194 | 273.0209   | -5.57      | 1745020 | 100.00   | 100.00          | (M+H)+      | 1 |
| 274.0222 | 274.0239   | -6.07      | 241502  | 13.84    | 16.63           | (M+H)+      | 1 |
| 275.0243 | 275.0253   | -3.66      | 26635   | 1.53     | 2.20            | (M+H)+      | 1 |
| 277.0321 | 277.0294   | 9.76       | 402     | 0.02     | 0.02            | (M+H)+      | 1 |
| 290.0538 | 290.0474   | 21.92      | 77      | 100.00   | 100.00          | (M+NH4)+    | 1 |
| 293.0056 | 293.0075   | -6.48      | 59052   | 5.55     | 6.36            | (M+Na)+     | 1 |
| 294.0089 | 294.0109   | -6.62      | 8388    | 0.79     | 0.91            | (M+Na)+     | 1 |
| 295.0011 | 295.0028   | -5.85      | 1063385 | 100.00   | 100.00          | (M+Na)+     | 1 |
| 296.0039 | 296.0058   | -6.33      | 146370  | 13.76    | 16.61           | (M+Na)+     | 1 |
| 297.0066 | 297.0073   | -2.24      | 15666   | 1.47     | 2.20            | (M+Na)+     | 1 |
| 298.0105 | 298.0094   | 3.64       | 876     | 0.08     | 0.21            | (M+Na)+     | 1 |

MassHunter Qual 10.0  
(End of Report)

## References

- (1) Q. Wang, Y. H. Nie, C. X. Liu, W. W. Zhang, Z. J. Wu, Q. Gu, C. Zheng, and S.-L. You, *ACS Catal.*, 2022, **12**, 3083–3093.
- (2) Z. Zhao, L. Racicot, and G. K. Murphy, *Angew. Chem. Int. Ed.*, 2017, **56**, 11620-11623.
- (3) (a) B. -F. Shi, N. Maugel, Y. H. Zhang, and J. -Q. Yu, *Angew. Chem. Int. Ed.*, 2008, **47**, 4882–4886. (b) J.-M. Gonzalez, X. Vidal, M.-A. Ortunno, J.-L. Mascarennas, and M. Gulias, *J. Am. Chem. Soc.*, 2022, **144**, 21437–21442.
